# Supplementary material
Source: PubMed Central journal article supplement (PMC4024079)
Supplement: NIHMS567627-supplement-Supplemental_Material.pdf [file NIHMS567627-supplement-Supplemental_Material.pdf]

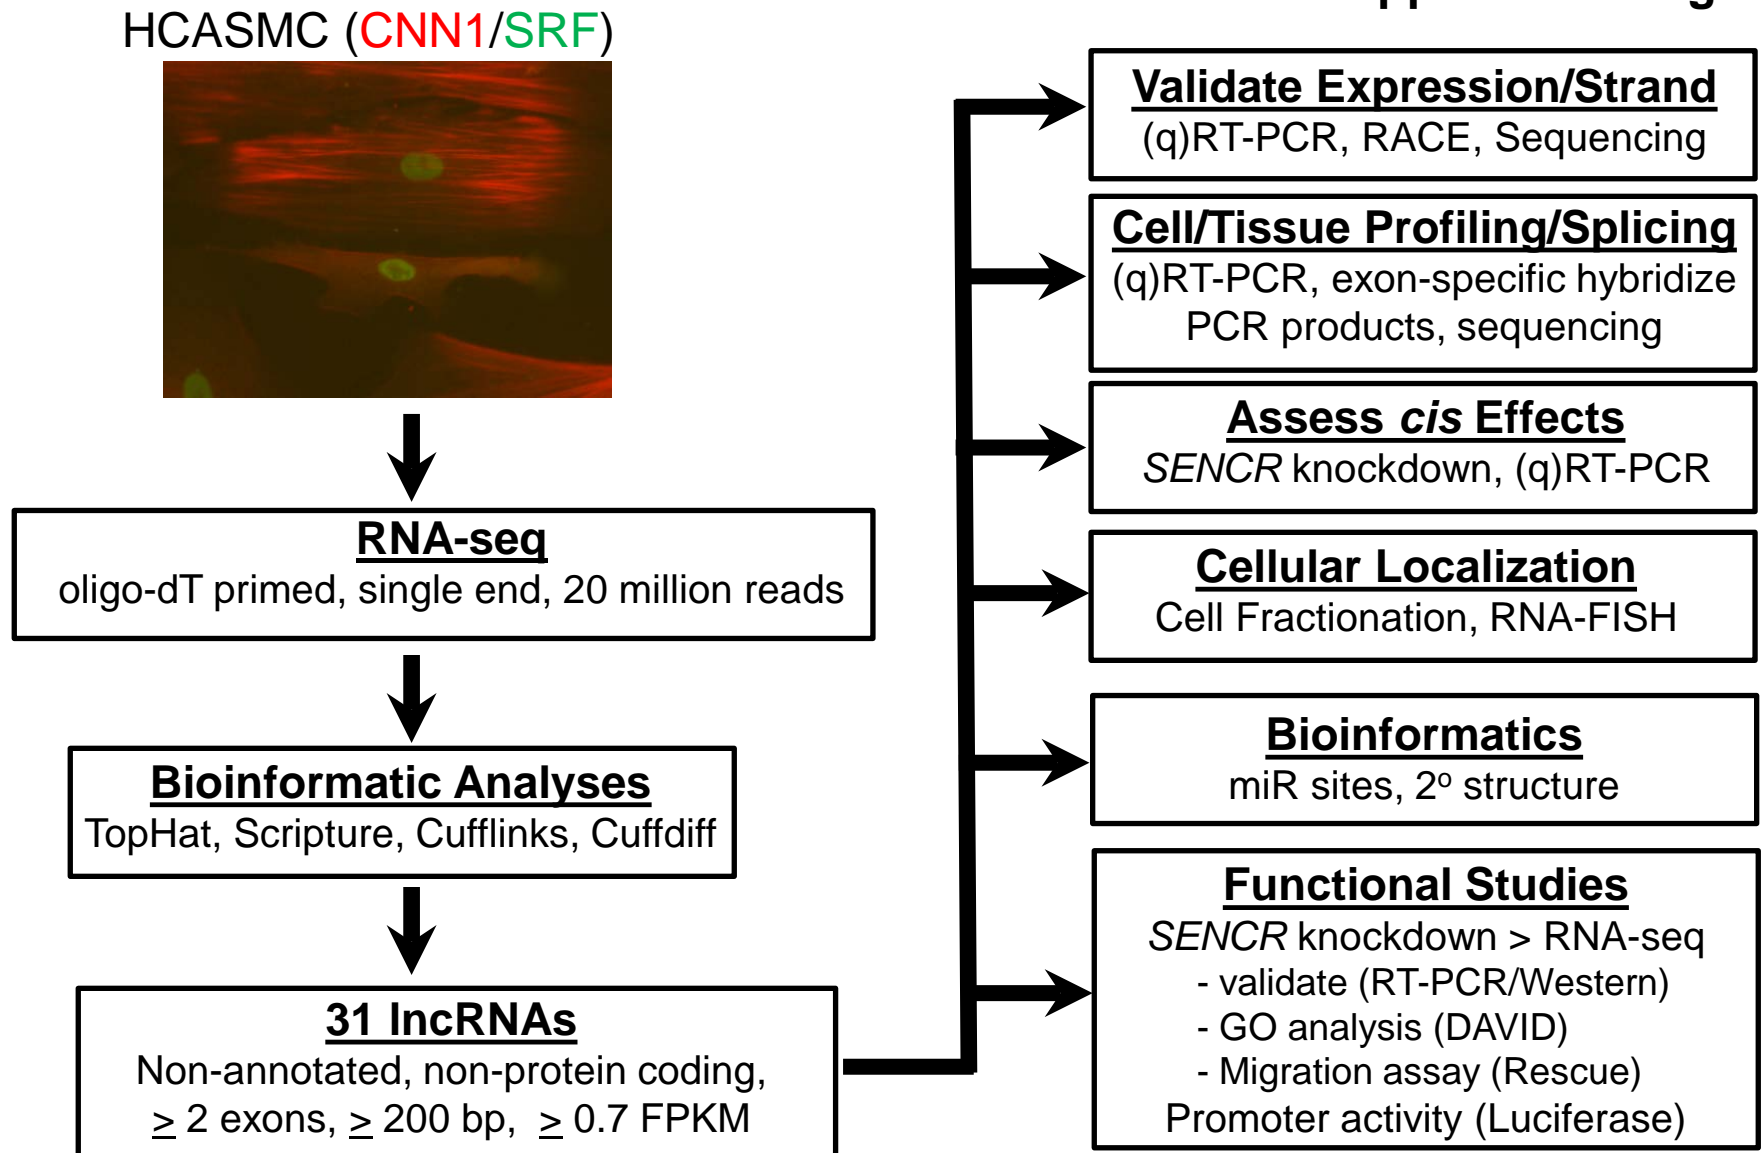

**Supplemental Figure I. Summary of experimental workflow.** We developed this workflow for the study of *SENCR* and other unannotated or uncharacterized lncRNAs. Primary cultures of HCASMC were chosen that express contractile proteins (such as CNN1 in red) as well as the SRF transcription factor (shown in green). See Materials and Methods and Results for further details.

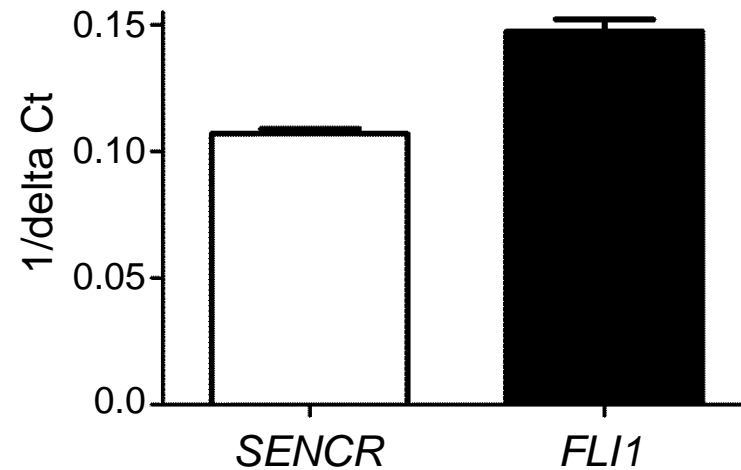

**Supplemental Figure II. Relative level of *SENCR* versus *FLI1* in HCASMC.** One divided by the delta Ct value for *SENCR* (n=9) and *FLI1* (n=9) RNA expression in HCASMC.

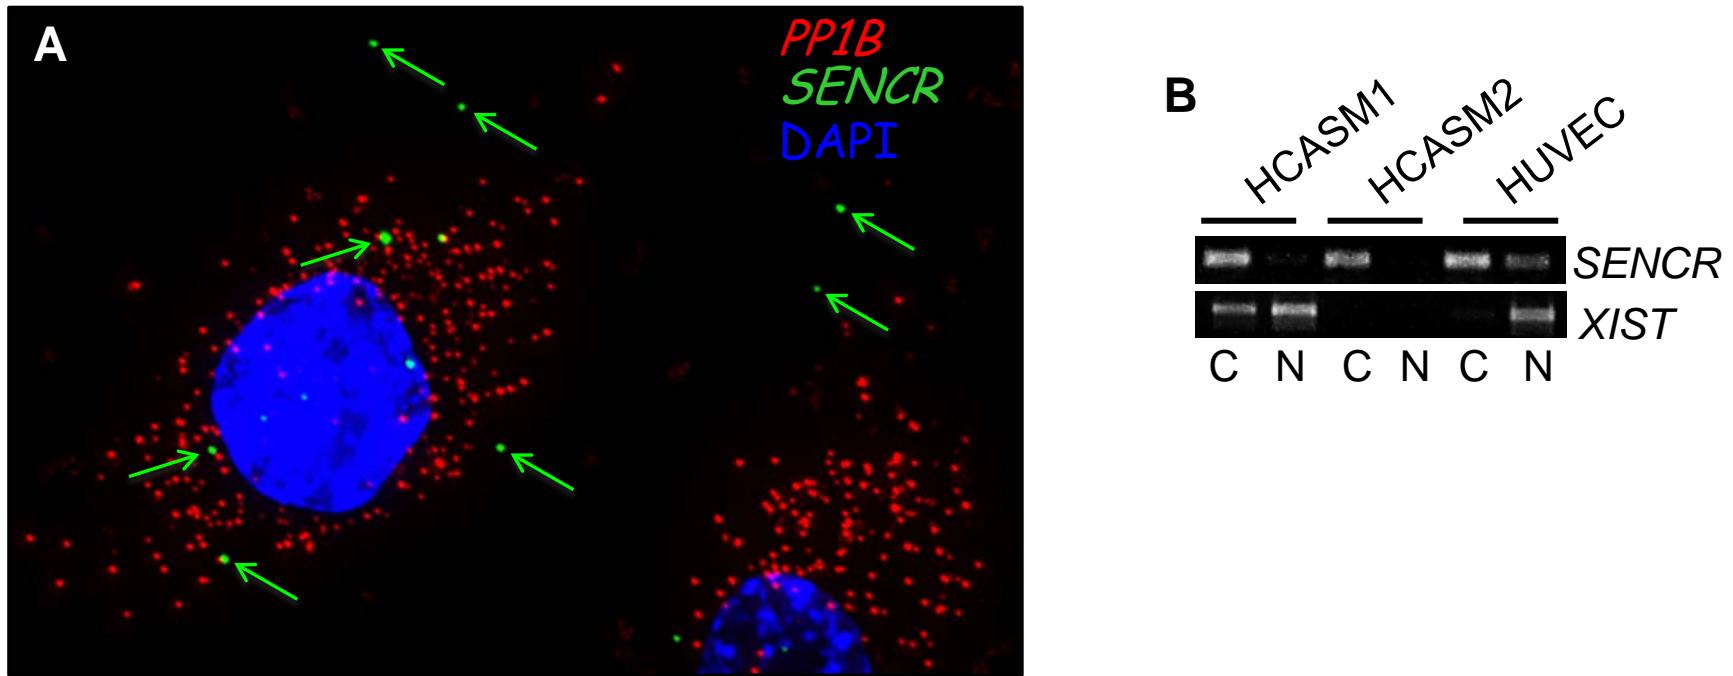

**Supplemental Figure III. Localization of *SENCR*.** (A) Higher magnification image of boxed region in Figure 4A. Arrows indicate *SENCR* transcripts localized to the cytoplasm of two HUVEC. Omission of labeled probes revealed no background fluorescence (not shown). (B) *SENCR* versus *XIST* RNA localization in cytoplasmic (C) or nuclear (N) fractions of the indicated cell types.

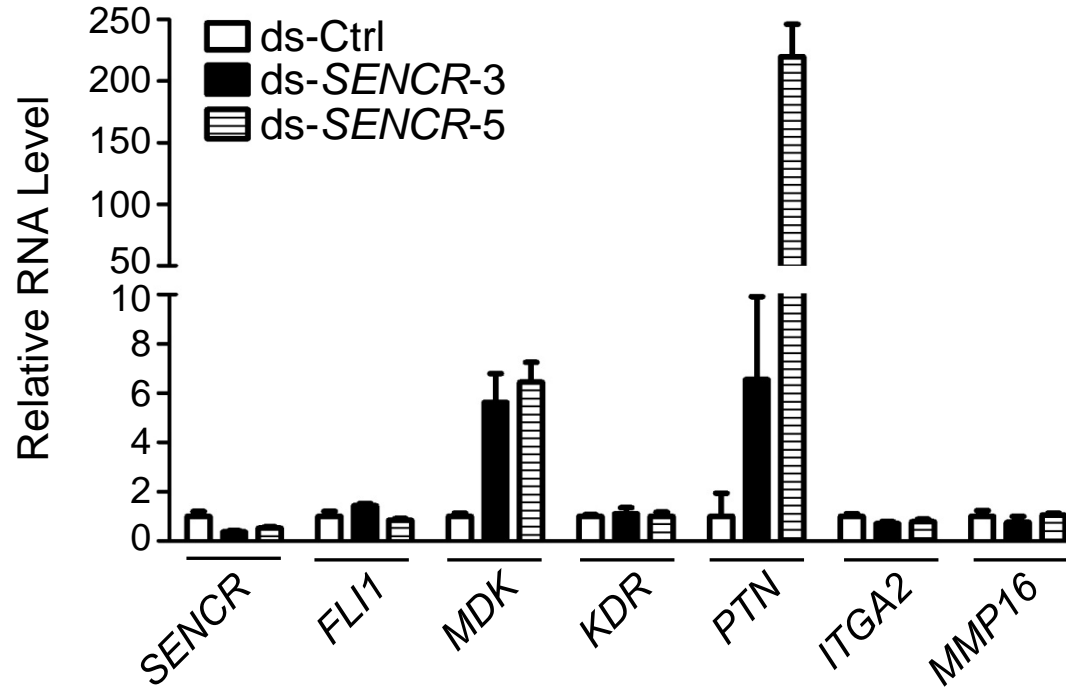

**Supplemental Figure IV. Effect of *SENCR* knockdown on expression of pro-migratory genes in HUVEC.** Quantitative RT-PCR of indicated genes following transfection with either control dicer substrate RNA or either of two dicer substrate RNAs that target different regions of *SENCR*. Note obvious reductions in *SENCR* upon its targeted knockdown with minimal effects on *FLI1*, but associated induction of *PTN* and *MDK*.

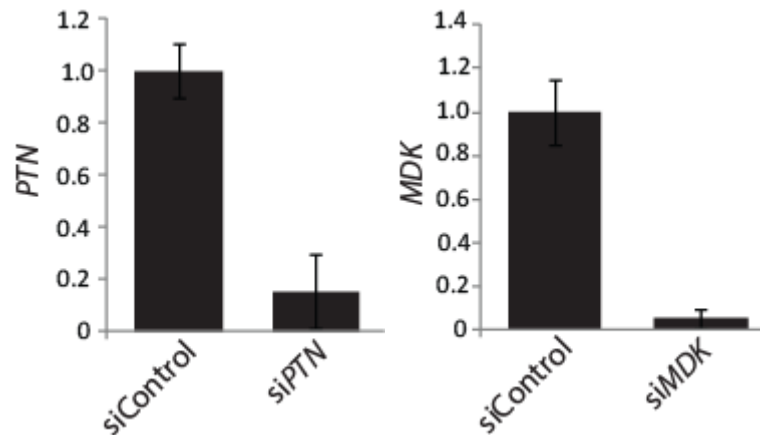

**Supplemental Figure V. siRNA knockdown of *PTN* and *MDK*.** Quantitative RT-PCR analysis of *PTN* (left) and *MDK* (right) mRNA levels after siRNA knockdown. The y-axis represents the normalized levels of each transcript with si-Controls set to 1.

PDGF-BB + ds-Ctrl

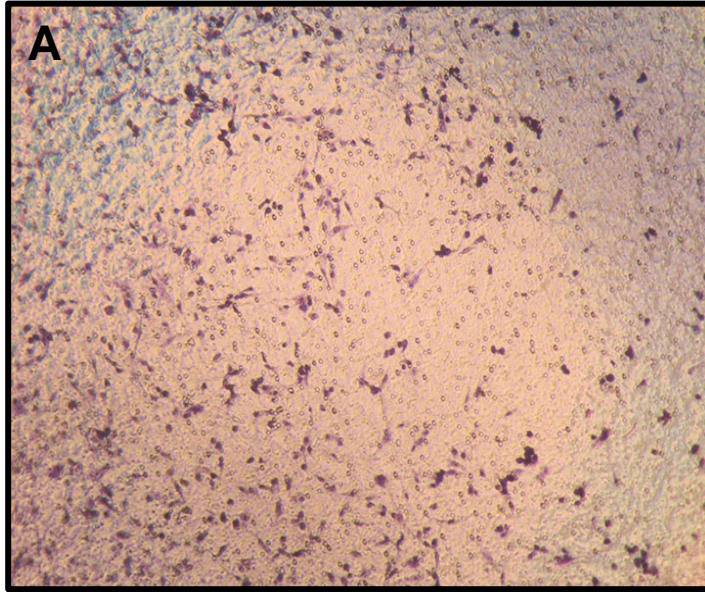

PDGF-BB + ds-*SENCR*-3

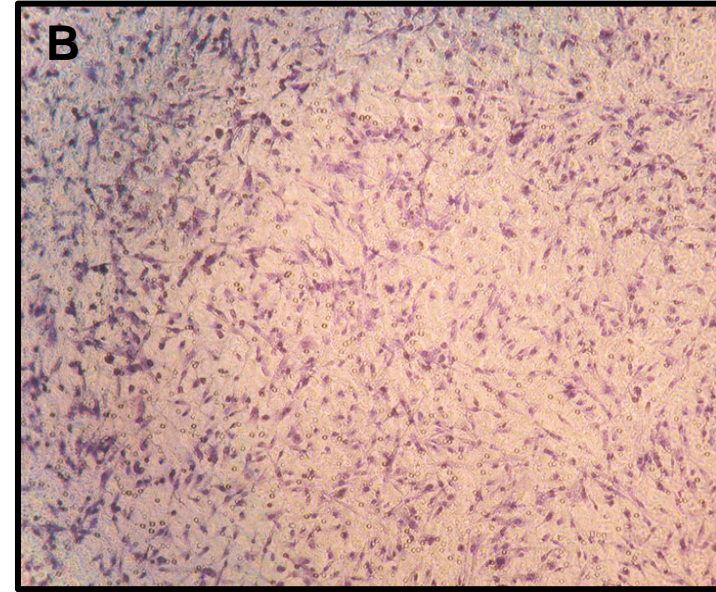

**Supplemental Figure VI. Effect of combined PDGF-BB treatment and *SENCR* knockdown on HCASMC migration.** Boyden chamber assay with HCASMC transfected with either control (A) or *SENCR* (B) dicer substrate RNA followed by 6 hr stimulation with 25 ng/ml PDGF-BB. Note accentuated HCASMC migration with combined PDGF-BB/*SENCR* knockdown.

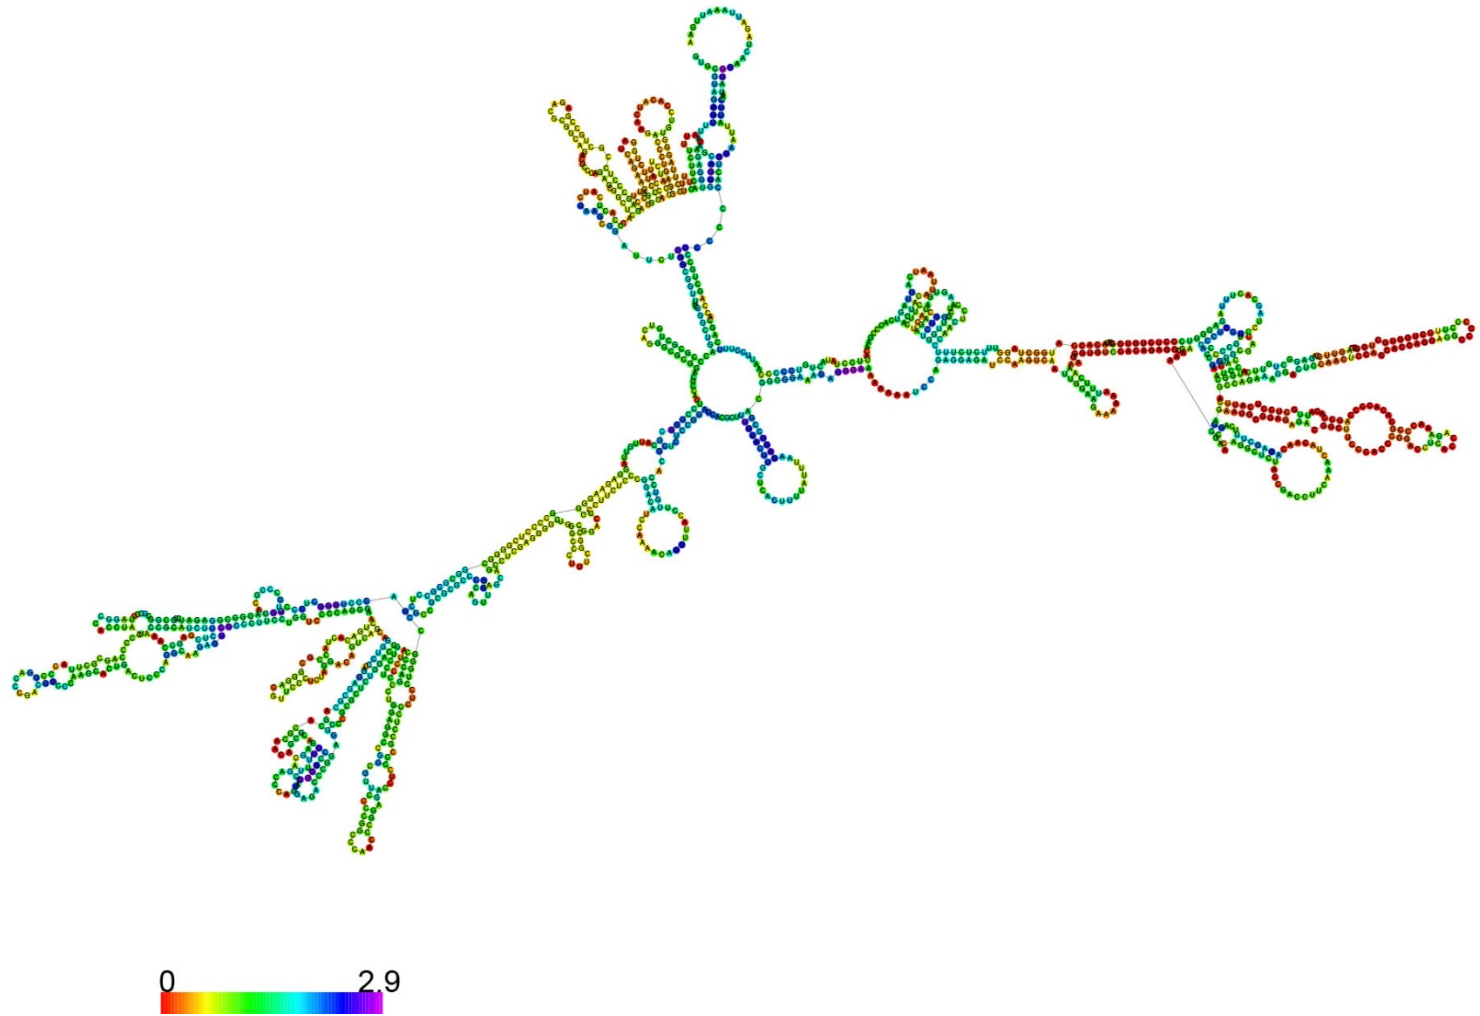

**Supplemental Figure VII. Predicted secondary structure of *SENCR\_V1*.** This secondary structure was generated with the program RNAFold. See Discussion for more details.

**Supplemental Table I: Oligonucleotides**

| Gene               | Strand  | Primer Sequence                     | Size (bp) | Application(s)        |
|--------------------|---------|-------------------------------------|-----------|-----------------------|
| <i>SENCR_V2</i>    | Forward | GTAGAGTTTAAGCAGTGTGGAG              | 259       | RT-PCR, fractionation |
|                    | Reverse | GGTGGTGGAGTTGGAGTC                  |           |                       |
| <i>SENCR_V2</i>    | Forward | TTACCTTGTCACGCTCTCC                 | 209       | qPCR                  |
|                    | Reverse | CCGTCTCTCCGCATTCTCC                 |           |                       |
| <i>FLI1</i>        | Forward | TGTCTCTTTCGCTCCGCTAC                | 211       | qPCR                  |
|                    | Reverse | CTCCTTAATAGTCCCCTCCATTG             |           |                       |
| <i>18S</i>         | Forward | ATGGGCGGCGGAAAATAGC                 | 100       | qPCR                  |
|                    | Reverse | TCTTGGTGAGGTCAATGTCTGC              |           |                       |
| <i>SENCR_V1/V2</i> | Forward | GTGCGTAGAGTTTAAGCAGTGTGGAGAT        | 1288/600  | RT-PCR, cloning       |
|                    | Reverse | AGGGCAAGTCTTCAATTTAATCTAGTTCCATATTG |           |                       |
| <i>NEAT1</i>       | Forward | TTCCTTCTTCCCTTTAAGTTTCAC            | 289       | RT-PCR, fractionation |
|                    | Reverse | CTTACCATACAGAGCAACATACC             |           |                       |
| <i>XIST</i>        | Forward | GAGATAGCTGCCTAGTGGAAATG             | 627       | RT-PCR, fractionation |
|                    | Reverse | CCTATCTGGGACCAGGAAAGTA              |           |                       |
| <i>GAPD</i>        | Forward | CGCTCTCTGCTCCTCCTGTTT               | 103       | qPCR                  |
|                    | Reverse | TTGACTCCGACCTTCACCTTCC              |           |                       |
| <i>ETS1</i>        | Forward | TGGACCAATCCAGCTATGGCAGTT            | 183       | qPCR                  |
|                    | Reverse | AGGCCACGGCTCAGTTTCTCATAA            |           |                       |
| <i>KCNJ1</i>       | Forward | ATCAAAGGTGCAGGGACTTGCTCA            | 105       | qPCR                  |
|                    | Reverse | AGTCCTCATGGATTGCTGGAGT              |           |                       |
| <i>MDK</i>         | Forward | ATTGCGGCGTGGGTTTC                   | 202       | qPCR                  |
|                    | Reverse | TCCTGGCACTGAGCATTGTA                |           |                       |
| <i>PTN</i>         | Forward | GAGCTGAGTGCAAGCAAAC                 | 200       | qPCR                  |
|                    | Reverse | CTTGGAGATGGTGACAGTCTT               |           |                       |
| <i>ITGA2</i>       | Forward | GTGGTTGTGTGTGATGAATCAAATAGT         | 200       | qPCR                  |
|                    | Reverse | GTCTGGGATGTTGCTACAATCATTT           |           |                       |
| <i>MMP16</i>       | Forward | TGCAGAGACCATGCAGTC                  | 210       | qPCR                  |
|                    | Reverse | CTGTAAGTGATGTGCTTGTGC               |           |                       |
|                    | Forward | GCGGCAGAGAAACCAGAC                  |           |                       |



|                     |         |                                |     |               |
|---------------------|---------|--------------------------------|-----|---------------|
| <i>LMOD1</i>        | Reverse | CCACTTGCTTGCTTTTCATCC          | 131 | qPCR          |
| <i>CNN1</i>         | Forward | ATGTCCTCTGCTCACTTCAAC          | 95  | qPCR          |
|                     | Reverse | GCTGGTGGTCATACTTCTGG           |     |               |
| <i>TAGLN</i>        | Forward | CATCCTGTCTGTCCGAACC            | 184 | qPCR          |
|                     | Reverse | CACTATGATCCACTCCACCAG          |     |               |
| <i>MYOCD</i>        | Forward | TGCTGCTGTAAAGTCCAAATCC         | 156 | qPCR          |
|                     | Reverse | GCGTAGGCTGAGTCCATAGG           |     |               |
| <i>Inc1</i>         | Forward | GGTGTCGAGCTTGAACGCTTTCTTAATTGG | 281 | RT-PCR        |
|                     | Reverse | AAGAGCACACCCGTCTATGTAGCA       |     |               |
| <i>Inc2</i>         | Forward | CTGGATTGCCACATGGCTCACATTG      | 262 | RT-PCR        |
|                     | Reverse | CTCCAGCAGCCTTCTTGTCATTGCTTC    |     |               |
| <i>Inc3</i>         | Forward | GCTTCCATTGGTGGGTCATTTT         | 222 | RT-PCR        |
|                     | Reverse | TATTGGCCAAGTGGAGACTGGTGT       |     |               |
| <i>Inc4</i>         | Forward | GGCTACACCCTAGACCAAACCTACGC     | 302 | RT-PCR        |
|                     | Reverse | TAGGGTGGGGCGCATCCATATAGTC      |     |               |
| <i>Inc5</i>         | Forward | ACTTTAGTGGCCTGTCCTGCTCA        | 276 | RT-PCR        |
|                     | Reverse | TGACGCCACCCAGGTTAAGAATA        |     |               |
| <i>Inc6</i>         | Forward | GGTGTGATGTTGGCTGTTGATGCTGTAA   | 415 | RT-PCR        |
|                     | Reverse | CTTCTCCATCAACGTCTTCAGCGA       |     |               |
| <i>Inc7</i>         | Forward | TTCCACCTTCACCACCTGCTGTAT       | 412 | RT-PCR        |
|                     | Reverse | GCACATCTGACAGCATTGCACACT       |     |               |
| <i>Inc8</i>         | Forward | GGTGTCGAGCTTGAACGCTTTCTT       | 282 | RT-PCR        |
|                     | Reverse | AAGAGCACACCCGTCTATGTAGCA       |     |               |
| <i>Inc9 (SENCR)</i> | Forward | CAGCCAGAAAGGACTCCAACCTCC       | 273 | RT-PCR, V1+V2 |
|                     | Reverse | GGAGGCAGCTGGTGCTGAAAG          |     |               |
| <i>Inc10</i>        | Forward | ACAGGTGGTGAAGCTCCTTATGGT       | 481 | RT-PCR        |
|                     | Reverse | AGCAACATGTCACCAGCGTACTCA       |     |               |
| <i>Inc11</i>        | Forward | AGCCAAGGAAGGCATCGAGAAGAT       | 231 | RT-PCR        |
|                     | Reverse | CTGTGATGACACCCTTTCTTCCAACC     |     |               |
| <i>Inc12</i>        | Forward | TACTGGTGGTGCAGTGTTTGGAGA       | 317 | RT-PCR        |
|                     | Reverse | AGGGCATCCGAACCTGTCTTTCT        |     |               |
|                     | Forward | GCAGCTTCACGTTGATGCCATTTT       |     |               |

|                   |            |                              |           |        |
|-------------------|------------|------------------------------|-----------|--------|
| <i>Inc13</i>      | Reverse    | CAAGCAAGAGTAGTCGCTGTTGGA     | 200       | RT-PCR |
|                   | Forward    | ATGTTCAACCTGTGTCCTGACCCT     |           |        |
| <i>Inc14</i>      | Reverse    | TCCAGTTCAGATAACAACCAGGCCA    | 239       | RT-PCR |
|                   | Forward    | CCCATTTGAGTTTCTTCAGATAGATCC  |           |        |
| <i>Inc15</i>      | Reverse    | TCCTGCCTAAATTACATCCAGGACCC   | 206       | RT-PCR |
|                   | Forward    | ATGGTGGAAATTTTCAGAGGAGCCC    |           |        |
| <i>Inc16</i>      | Reverse    | TAGCCACGATTGTTTCCTCGTCCT     | 238       | RT-PCR |
|                   | Forward    | TGGCCAGTACAGTGGTAGCAGTT      |           |        |
| <i>Inc17</i>      | Reverse    | TGGCAGTAGGGCTTACACCTAGTA     | 219       | RT-PCR |
|                   | Forward    | ACCTCACTGAAGCCAAGTCCACAA     |           |        |
| <i>Inc18</i>      | Reverse    | ATCTAGCAATTGGGAGGCAGCAGA     | 251       | RT-PCR |
|                   | Forward    | TAGAAGCATTACCTGCCAGCTCCA     |           |        |
| <i>Inc21</i>      | Reverse    | CAAAGCTGGAAAGGACAGTGGGAA     | 210       | RT-PCR |
|                   | Forward    | ACACTCGGGAGGTGTCTTGAGATT     |           |        |
| <i>Inc22</i>      | Reverse    | AACATTCCCTCCTTTGGCCCTACA     | 384       | RT-PCR |
|                   | Forward    | TTAGCCTTCTGAGCTTTCTGGGCA     |           |        |
| <i>Inc23</i>      | Reverse    | GAAATCTGGTGATGCTGCCATCGT     | 204       | RT-PCR |
|                   | Forward    | ACATGCACACACACGCATACACAC     |           |        |
| <i>Inc24</i>      | Reverse    | TCCTTGAACGTGAAGGACTGGGTT     | 527       | RT-PCR |
|                   | Forward    | TACCGGCAAGATCATCACCTTGA      |           |        |
| <i>Inc26</i>      | Reverse    | TGTAGTCAGAAAGACTGCGGCCAT     | 383       | RT-PCR |
|                   | Forward    | TGGAGTGACGACTTCGGTTTGAGT     |           |        |
| <i>Inc27</i>      | Reverse    | CCCTTCCCAATTCCACAACGCAAT     | 212       | RT-PCR |
|                   | Forward    | AGAGAGGACATGGGTTTCTCTGC      |           |        |
| <i>Inc29</i>      | Reverse    | AAATGGTGGCAGACATGTGCAAGG     | 206       | RT-PCR |
|                   | Forward    | TGAAGGAGACTTGGAACGCACAGA     |           |        |
| <i>Inc30</i>      | Reverse    | ACCGATCTCTCAGCAAACCTCAGCA    | 222       | RT-PCR |
| <i>ds-SENCR-1</i> | Sense      | GUGGCAGACACCAUGGCUAGGUUTC    | Knockdown |        |
|                   | Anti-sense | GAAACCUAGCCAUGGUCUCUGCCACAG  | exon 3    | RT-PCR |
| <i>ds-SENCR-2</i> | Sense      | GCAGUGGUGGAGAUUUUCUUCACTT    | Knockdown |        |
|                   | Anti-sense | AAGUGAAGAAUAUCUCCACACACUGCUU | exon 1    | RT-PCR |

|                          |                     |                                                                            |                        |                              |
|--------------------------|---------------------|----------------------------------------------------------------------------|------------------------|------------------------------|
| ds- <i>SENCR</i> -3      | Sense<br>Anti-sense | CAUUCAGCCAGAAAGGACUCCA<br>AGUUGGAGUCCUUUCUGGCUGAAUGAG                      | Knockdown<br>exon 3    | RT-PCR<br>RNA-FISH, Western  |
| ds- <i>SENCR</i> -4      | Sense<br>Anti-sense | CUUCAACUACAACAGAGCUUUCAG<br>CUGAAAGCUCUGUUGUAGUUUGAAGGU                    | Knockdown<br>exon 3    | RT-PCR,<br>RNA-FISH, Western |
| ds- <i>SENCR</i> -5      | Sense<br>Anti-sense | AGAGGAGAUCCAAGUCAAUUGGAAG<br>CUUCCA AUUGACUUGGAUCUCCUCUGG                  | Knockdown<br>exon 2    | RT-PCR,<br>RNA-FISH, Western |
| si- <i>PTN</i>           | Sense<br>Anti-sense | AAACCUCAAGCAGAAUCUAtt<br>UAGAUUCUGCUUGAGGUUUgg                             | Knockdown<br>exons 4-5 | RT-PCR, Rescue migration     |
| si- <i>MDK</i>           | Sense<br>Anti-sense | CGUUAGCUUUAAUCAAUCAtt<br>UGAUUGAUUAAAGCUAACGag                             | Knockdown<br>exon 5    | RT-PCR, Rescue migration     |
| si- <i>SRF</i>           | Sense<br>Anti-sense | UGAUGUACCCUAGCCCGCA<br>UGC GGCUAGGGUACAUCA                                 | Knockdown<br>exon 5    | RT-PCR                       |
| <i>SENCR</i> promoter(1) | Forward<br>Reverse  | GATACGCTAGCTCACCAAGAGAGCAGAAGAATG<br>GATACAAGCTTGATCCAGAAGGGTGGTAAGATG     | 555                    | Luciferase assay             |
| <i>SENCR</i> promoter(2) | Forward<br>Reverse  | GATACGCTAGCCCATGTCTGTCTTCTCTGTCTC<br>GATACAAGCTTGATCCAGAAGGGTGGTAAGATG     | 1390                   | Luciferase assay             |
| <i>SENCR</i> promoter(3) | Forward<br>Reverse  | GATACGCTAGCCCATGTCTGTCTTCTCTGTCTC<br>GATACAAGCTTAGCCTGGGTCTAGGTTGCAAAGTC   | 2145                   | Luciferase assay             |
| <i>SENCR</i> promoter(4) | Forward<br>Reverse  | GATACAAGCTTCCATGTCTGTCTTCTCTGTCTC<br>GATACGTCGACCTAGCCA ACTCTCCCTCCATAC    | 3804                   | Luciferase assay             |
| <i>DLL4</i> promoter     | Forward<br>Reverse  | GATACCTCGAGTGCTCAGCAAATGTGGGCAAAGCTC<br>GATACAAGCTTCCCCTCGGGCGTCGCTCTCTCCA | 2673                   | Luciferase assay             |
| <i>FLI1</i> promoter     | Forward<br>Reverse  | GATACGTCGACCTAGCCA ACTCTCCCTCCATAC<br>GATACGTCGACACACATTGACCCGGTTACAG      | 730                    | Luciferase assay             |

**Supplemental Table II: HCASMC lncRNA Annotation**

| <b>LncRNA</b> | <b>Chromosomal Coordinates</b> | <b>FPKM</b> | <b>Nearest Gene</b> | <b>Class of LncRNA</b> | <b>Gene (bp)</b> | <b>RNA (bp)</b> | <b>Exons</b> |
|---------------|--------------------------------|-------------|---------------------|------------------------|------------------|-----------------|--------------|
| 1             | chr11:10529961-10530629        | 73.07686    | <i>AMPD3</i>        | Overlapping Antisense  | 670              | 434             | 3            |
| 2             | chr12:44053658-44055300        | 25.7154     | <i>PUS7L</i>        | lincRNA                | 1644             | 1537            | 2            |
| 3             | chr15:53229136-53230825        | 32.0959     | <i>ONECUT1</i>      | lincRNA                | 1691             | 1442            | 2            |
| 4             | chr17:51183035-51183819        | 29.7556     | <i>C17ORF112</i>    | lincRNA                | 786              | 632             | 2            |
| 5             | chr2:85568560-85568968         | 25.7651     | <i>RETSAT</i>       | lincRNA                | 410              | 316             | 2            |
| 6             | chr12:8167668-8170528          | 10.44818    | <i>FOXJ2</i>        | lincRNA                | 2862             | 1763            | 3            |
| 7             | chr1:186503185-186504791       | 2.49228     | <i>PDC</i>          | lincRNA                | 1608             | 188             | 2            |
| 8             | chr11:10530055-10530570        | 10.6143     | <i>AMPD3</i>        | Overlapping Sense      | 517              | 256             | 2            |
| 9             | chr11:128561579-128565159      | 0.817717    | <i>FLI1</i>         | Overlapping Antisense  | 4352             | 1324            | 3            |
| 10            | chr11:3404694-3406064          | 1.05462     | <i>ZNF195</i>       | lincRNA                | 1372             | ND              | 2            |
| 11            | chr12:56905202-56906483        | 1.23896     | <i>RBMS2</i>        | lincRNA                | 1283             | 1019            | 3            |
| 12            | chr12:102267056-102267421      | 6.90622     | <i>DRAM1</i>        | lincRNA                | 367              | 186             | 2            |
| 13            | chr14:21189013-21190323        | 1.38877     | <i>RNASE4</i>       | lincRNA                | 1312             | ND              | 2            |
| 14            | chr14:35899242-35899465        | 7.58485     | <i>NFKBIA</i>       | lincRNA                | 225              | 168             | 2            |
| 15            | chr14:43769419-43769826        | 18.2421     | <i>FSCB</i>         | lincRNA                | 409              | 279             | 2            |
| 16            | chr14:45759231-45759672        | 0.76604     | <i>MIS181</i>       | lincRNA                | 443              | 390             | 2            |
| 17            | chr14:44589064-44589961        | 2.76558     | <i>FSCB</i>         | lincRNA                | 899              | 205             | 2            |
| 18            | chr15:23142469-23145926        | 16.8838     | <i>LOC283683</i>    | lincRNA                | 3459             | ND              | 2            |
| 19            | chr15:97094528-97095952        | 1.88622     | <i>NR2F2</i>        | lincRNA                | 1426             | 476             | 2            |
| 20            | chr15:93277172-93277445        | 1.94676     | <i>FAM174B</i>      | Overlapping Antisense  | 275              | 196             | 2            |
| 21            | chr16:15457519-15458790        | 1.76395     | <i>NPIPA5</i>       | Overlapping Sense      | 1273             | 479             | 2            |
| 22            | chr16:27144448-27145052        | 14.9873     | <i>C16orf82</i>     | lincRNA                | 606              | 437             | 2            |
| 23            | chr16:29223901-29232315        | 1.17883     | <i>RRN3P2</i>       | Intronic Antisense     | 8416             | 3751            | 3            |
| 24            | chr17:58177984-58180097        | 0.785952    | <i>APS12</i>        | Overlapping Antisense  | 2115             | 769             | 2            |
| 25            | chr17:21730708-21731863        | 9.14475     | <i>UBC</i>          | Overlapping Antisense  | 1157             | 1002            | 2            |
| 26            | chr17:40684243-40686068        | 3.43368     | <i>NAGLU</i>        | lincRNA                | 1827             | 1180            | 2            |
| 27            | chr18:12211342-12211882        | 1.34323     | <i>C18ORF61</i>     | Intronic Sense         | 542              | 449             | 2            |
| 28            | chr18:51933119-51933506        | 10.7875     | <i>C18ORF54</i>     | lincRNA                | 389              | 333             | 2            |
| 29            | chr19:42012005-42012823        | 11.747      | <i>LOC100505495</i> | lincRNA                | 820              | 631             | 2            |
| 30            | chr19:18141391-18144200        | 6.79831     | <i>ARRDC2</i>       | lincRNA                | 2811             | 2718            | 2            |
| 31            | chr8:129347866-129355944       | 1.31767     | <i>PVT1</i>         | lincRNA                | 8080             | 5799            | 3            |
| AVG           |                                | 11.11386    |                     |                        | 1532.2           | 835.6           | 2.2          |

**Supplemental Table III: Significantly Regulated Protein Coding Genes Upon *SENCR* Knockdown**  
**Down-regulated genes (those highlighted in red are SMC contractile genes)**

| Gene Symbol  | Chr Coordinates        | Avg FPKM-SI | Avg FRKM-CI | Ratio    | log2 fold | test_stat | p_value  | q_value  | Sig? |
|--------------|------------------------|-------------|-------------|----------|-----------|-----------|----------|----------|------|
| NPPB         | 1:11917520-11918992    | 1.67187     | 6.91744     | 0.241689 | -2.04878  | -7.56067  | 4.02E-14 | 6.36E-12 | yes  |
| AS3MT        | 10:104613966-104661656 | 0.1         | 0.43491     | 0.229933 | -2.12072  | 1.79769e+ | 3.21E-11 | 3.00E-09 | yes  |
| KRT81        | 12:52679696-52685299   | 0.508238    | 1.58705     | 0.320241 | -1.64277  | -6.0158   | 1.79E-09 | 1.25E-07 | yes  |
| SAA2-SAA4    | 11:18252901-18270221   | 1.09508     | 3.28963     | 0.332889 | -1.58689  | -3.4807   | 0.0005   | 0.008951 | yes  |
| KRT83        | 12:52708084-52715182   | 0.320339    | 0.953714    | 0.335886 | -1.57396  | -4.50286  | 6.70E-06 | 0.000215 | yes  |
| INHBE        | 12:57849095-57851791   | 0.801588    | 2.26764     | 0.35349  | -1.50026  | -7.79683  | 6.44E-15 | 1.15E-12 | yes  |
| SAA3P        | 11:18134018-18137679   | 2.45141     | 6.87889     | 0.356367 | -1.48856  | -6.00159  | 1.95E-09 | 1.34E-07 | yes  |
| SAA1         | 11:18287807-18291524   | 5.78412     | 16.0323     | 0.360779 | -1.47081  | -7.22546  | 4.99E-13 | 6.48E-11 | yes  |
| SAA2         | 11:18252901-18270221   | 4.3833      | 11.931      | 0.367387 | -1.44463  | -6.36198  | 1.99E-10 | 1.63E-08 | yes  |
| KRT85        | 12:52753789-52761309   | 0.205943    | 0.558741    | 0.368584 | -1.43993  | -3.81788  | 0.000135 | 0.002998 | yes  |
| KRT86        | 12:52695648-52702947   | 0.318752    | 0.849578    | 0.375189 | -1.41431  | -4.22833  | 2.35E-05 | 0.000663 | yes  |
| LOC100506119 | 9:132099227-132109756  | 1.46674     | 3.79696     | 0.386293 | -1.37223  | -4.56135  | 5.08E-06 | 0.000166 | yes  |
| ACTBL2       | 5:56775842-56778636    | 7.85865     | 20.0093     | 0.39275  | -1.34832  | -17.8567  | 0        | 0        | yes  |
| <b>ACTA2</b> | 10:90694830-90775542   | 86.5123     | 212.557     | 0.407008 | -1.29687  | -16.3592  | 0        | 0        | yes  |
| COL15A1      | 9:101706137-101833068  | 0.195063    | 0.476933    | 0.408995 | -1.28985  | -4.8835   | 1.04E-06 | 3.98E-05 | yes  |
| HAPLN1       | 5:82934016-83016896    | 1.83977     | 4.32533     | 0.425348 | -1.23328  | -12.8233  | 0        | 0        | yes  |
| TNFRSF11B    | 8:119935795-119964383  | 55.2971     | 129.003     | 0.42865  | -1.22213  | -16.0536  | 0        | 0        | yes  |
| HSPB7        | 1:16340522-16345285    | 3.14588     | 7.33526     | 0.428871 | -1.22138  | -12.7874  | 0        | 0        | yes  |
| CHAC1        | 15:41245635-41248717   | 1.70823     | 3.95139     | 0.432311 | -1.20986  | -6.95146  | 3.62E-12 | 4.07E-10 | yes  |
| RAB33A       | X:129305772-129318844  | 1.00234     | 2.31748     | 0.432513 | -1.20918  | -4.35308  | 1.34E-05 | 0.0004   | yes  |
| LOC100131774 | 6:132266629-132272518  | 33.4117     | 77.1881     | 0.432861 | -1.20803  | -3.8935   | 9.88E-05 | 0.002297 | yes  |
| CCL20        | 2:228678557-228682280  | 1.85539     | 4.27492     | 0.434017 | -1.20417  | -4.86084  | 1.17E-06 | 4.43E-05 | yes  |
| ACTC1        | 15:35080296-35087927   | 19.2515     | 41.9828     | 0.458557 | -1.12483  | -15.4256  | 0        | 0        | yes  |
| TIMP3        | 22:32908538-33454377   | 46.4899     | 100.731     | 0.461525 | -1.11552  | -12.026   | 0        | 0        | yes  |
| KRT7         | 12:52626953-52642709   | 3.85443     | 8.32579     | 0.462951 | -1.11107  | -9.86012  | 0        | 0        | yes  |
| CXCR7        | 2:237478379-237490997  | 0.483021    | 1.03894     | 0.464917 | -1.10495  | -3.95532  | 7.64E-05 | 0.001845 | yes  |
| ENC1         | 5:73923233-73937249    | 6.00301     | 12.8552     | 0.466971 | -1.09859  | -15.277   | 0        | 0        | yes  |
| <b>MYLK</b>  | 3:123304402-123603149  | 18.5221     | 39.6366     | 0.467298 | -1.09759  | -11.9095  | 0        | 0        | yes  |
| NOV          | 8:120428551-120436678  | 0.787773    | 1.68063     | 0.468737 | -1.09315  | -5.60636  | 2.07E-08 | 1.11E-06 | yes  |
| KRT8P41      | 11:9115909-9117737     | 0.478481    | 1.00633     | 0.475471 | -1.07257  | -3.52188  | 0.000429 | 0.007865 | yes  |
| IGFBP3       | 7:45951843-45960871    | 191.608     | 402.169     | 0.476437 | -1.06964  | -11.7018  | 0        | 0        | yes  |

|              |                        |          |          |          |          |          |          |          |     |
|--------------|------------------------|----------|----------|----------|----------|----------|----------|----------|-----|
| CSF2RB       | 22:37309674-37336481   | 2.81491  | 5.89889  | 0.477193 | -1.06735 | -12.7188 | 0        | 0        | yes |
| JPH2         | 20:42740336-42816218   | 0.69806  | 1.45422  | 0.480024 | -1.05882 | -6.21476 | 5.14E-10 | 3.94E-08 | yes |
| <b>LMOD1</b> | 1:201865583-201915716  | 2.65474  | 5.51853  | 0.481059 | -1.05571 | -11.5643 | 0        | 0        | yes |
| ODZ2         | 5:166711842-167691162  | 1.06153  | 2.20623  | 0.481151 | -1.05544 | -11.5783 | 0        | 0        | yes |
| C5orf46      | 5:147272270-147286101  | 22.2304  | 45.9869  | 0.483407 | -1.04869 | -10.3974 | 0        | 0        | yes |
| ANKRD1       | 10:92671856-92681032   | 3.54056  | 7.31689  | 0.483889 | -1.04725 | -9.57888 | 0        | 0        | yes |
| SYNPO2       | 4:119809995-119982402  | 1.81866  | 3.72613  | 0.488083 | -1.0348  | -12.0345 | 0        | 0        | yes |
| GPR146       | 7:1036622-1177893      | 0.700562 | 1.43295  | 0.488895 | -1.0324  | -3.77002 | 0.000163 | 0.003542 | yes |
| TAGLN3       | 3:111717585-111732735  | 34.9237  | 70.7745  | 0.49345  | -1.01902 | -14.1732 | 0        | 0        | yes |
| MRVI1        | 11:10562786-10715535   | 0.347498 | 0.70418  | 0.493479 | -1.01894 | -4.08586 | 4.39E-05 | 0.001144 | yes |
| RCAN1        | 21:35888781-35987382   | 29.2689  | 58.5358  | 0.500017 | -0.99995 | -11.0291 | 0        | 0        | yes |
| <b>TAGLN</b> | 11:117070039-117075508 | 368.996  | 735.728  | 0.501539 | -0.99557 | -8.84955 | 0        | 0        | yes |
| LMCD1        | 3:8543510-8609806      | 3.44113  | 6.84249  | 0.502906 | -0.99164 | -8.36276 | 0        | 0        | yes |
| <b>CNN1</b>  | 19:11649578-11661138   | 5.8471   | 11.5633  | 0.50566  | -0.98376 | -9.98346 | 0        | 0        | yes |
| SH3D21       | 1:36771993-36786948    | 1.09867  | 2.12944  | 0.515943 | -0.95472 | -5.0487  | 4.45E-07 | 1.84E-05 | yes |
| IL11         | 19:55875756-55881814   | 8.96239  | 17.3272  | 0.517244 | -0.95108 | -12.2345 | 0        | 0        | yes |
| CTGF         | 6:132266629-132272518  | 64.4106  | 122.406  | 0.526205 | -0.9263  | -11.4823 | 0        | 0        | yes |
| GADD45B      | 19:2476122-2478257     | 4.30825  | 8.15087  | 0.528563 | -0.91985 | -7.55741 | 4.11E-14 | 6.43E-12 | yes |
| AMIGO2       | 12:47469489-47473734   | 30.6569  | 57.8879  | 0.529591 | -0.91705 | -12.1143 | 0        | 0        | yes |
| MIR143HG     | 5:148786439-148812399  | 0.497345 | 0.933624 | 0.532704 | -0.90859 | -6.91726 | 4.60E-12 | 5.04E-10 | yes |
| NEDD9        | 6:11183530-11382581    | 0.531277 | 0.98913  | 0.537115 | -0.8967  | -4.05812 | 4.95E-05 | 0.001266 | yes |
| DDAH1        | 1:85784167-86044046    | 12.6296  | 23.4038  | 0.539639 | -0.88993 | -11.7766 | 0        | 0        | yes |
| <b>ACTG2</b> | 2:74120092-74146780    | 96.373   | 177.743  | 0.542204 | -0.88309 | -9.42404 | 0        | 0        | yes |
| ASNS         | 7:97481428-97501854    | 8.13674  | 14.9365  | 0.544755 | -0.87632 | -8.1206  | 4.44E-16 | 8.89E-14 | yes |
| ERRFI1       | 1:8071778-8086393      | 3.52708  | 6.37954  | 0.552874 | -0.85498 | -9.32079 | 0        | 0        | yes |
| FGF11        | 17:7342688-7348251     | 2.56331  | 4.63438  | 0.553107 | -0.85437 | -7.787   | 6.88E-15 | 1.21E-12 | yes |
| LOC100507632 | 8:57430876-57472382    | 1.87194  | 3.35846  | 0.55738  | -0.84327 | -6.36932 | 1.90E-10 | 1.57E-08 | yes |
| PCSK7        | 11:117075787-117102811 | 8.66224  | 15.3665  | 0.563709 | -0.82698 | -11.3769 | 0        | 0        | yes |
| ALDH1B1      | 9:38392701-38398658    | 4.15765  | 7.3168   | 0.568233 | -0.81544 | -9.26222 | 0        | 0        | yes |
| MFAP5        | 12:8798539-8815433     | 12.1913  | 21.3741  | 0.570377 | -0.81001 | -11.2424 | 0        | 0        | yes |
| LOC442028    | 2:95534429-95613087    | 1.45319  | 2.5378   | 0.572618 | -0.80436 | -6.16914 | 6.87E-10 | 5.18E-08 | yes |
| IL6          | 7:22765013-22771621    | 229.219  | 399.805  | 0.573327 | -0.80257 | -9.80771 | 0        | 0        | yes |
| C1orf198     | 1:230972864-231005335  | 8.83     | 15.4012  | 0.573332 | -0.80256 | -9.65789 | 0        | 0        | yes |
| NRXN3        | 14:78870092-80330762   | 0.445496 | 0.773991 | 0.575583 | -0.7969  | -3.6789  | 0.000234 | 0.004794 | yes |

|              |                        |          |          |          |          |          |          |          |     |
|--------------|------------------------|----------|----------|----------|----------|----------|----------|----------|-----|
| SFRP4        | 7:37945533-37956525    | 3.81677  | 6.58431  | 0.579677 | -0.78668 | -8.61986 | 0        | 0        | yes |
| C7orf68      | 7:128095883-128098472  | 11.2654  | 19.4275  | 0.579869 | -0.7862  | -6.69588 | 2.14E-11 | 2.10E-09 | yes |
| KRT5         | 12:52908358-52914243   | 0.777638 | 1.34052  | 0.580102 | -0.78562 | -3.61473 | 0.000301 | 0.005894 | yes |
| GALNTL2      | 3:16216183-16271253    | 0.6391   | 1.1      | 0.581    | -0.78339 | -4.74781 | 2.06E-06 | 7.30E-05 | yes |
| PIM1         | 6:37137921-37143204    | 1.66177  | 2.85703  | 0.581642 | -0.7818  | -5.7411  | 9.41E-09 | 5.53E-07 | yes |
| ADM2         | 22:50920011-50924866   | 1.21708  | 2.08868  | 0.582703 | -0.77917 | -6.21668 | 5.08E-10 | 3.91E-08 | yes |
| GRAMD3       | 5:125695787-125829853  | 3.53189  | 6.06045  | 0.582777 | -0.77898 | -4.96505 | 6.87E-07 | 2.73E-05 | yes |
| PCK2         | 14:24563482-24573339   | 5.35134  | 9.15045  | 0.584817 | -0.77394 | -7.75219 | 9.10E-15 | 1.58E-12 | yes |
| FHL1         | X:135228860-135293518  | 3.81848  | 6.51074  | 0.586489 | -0.76982 | -4.71288 | 2.44E-06 | 8.52E-05 | yes |
| NR4A1        | 12:52416615-52453291   | 2.71423  | 4.6032   | 0.58964  | -0.76209 | -4.197   | 2.70E-05 | 0.000755 | yes |
| LBH          | 2:30454396-30482899    | 2.45928  | 4.1701   | 0.589741 | -0.76185 | -7.02591 | 2.13E-12 | 2.49E-10 | yes |
| STK38L       | 12:27397077-27478892   | 5.33448  | 8.99421  | 0.593102 | -0.75365 | -10.2689 | 0        | 0        | yes |
| POTEH        | 22:16256331-16287937   | 5.30341  | 8.92885  | 0.593963 | -0.75155 | -7.98588 | 1.33E-15 | 2.53E-13 | yes |
| SORT1        | 1:109852186-109940563  | 1.4335   | 2.41072  | 0.594636 | -0.74992 | -7.31674 | 2.54E-13 | 3.42E-11 | yes |
| COL4A3       | 2:228029280-228189936  | 0.291942 | 0.490896 | 0.594713 | -0.74974 | -4.0634  | 4.84E-05 | 0.001244 | yes |
| LOC100128164 | 3:169661771-169684522  | 1.4763   | 2.48136  | 0.594956 | -0.74915 | -7.58895 | 3.22E-14 | 5.21E-12 | yes |
| NUAK1        | 12:106457124-106533811 | 6.97374  | 11.6955  | 0.596275 | -0.74595 | -10.4316 | 0        | 0        | yes |
| TGFBR1       | 9:101867411-101916474  | 4.26062  | 7.13381  | 0.597243 | -0.74361 | -9.47429 | 0        | 0        | yes |
| SLC7A5       | 16:87863628-87903100   | 14.2379  | 23.7992  | 0.598251 | -0.74118 | -7.40368 | 1.33E-13 | 1.91E-11 | yes |
| C8orf4       | 8:40010988-40012821    | 21.9927  | 36.7101  | 0.599091 | -0.73915 | -10.2989 | 0        | 0        | yes |
| GPT2         | 16:46918307-46965201   | 2.81567  | 4.69091  | 0.60024  | -0.73639 | -6.70313 | 2.04E-11 | 2.01E-09 | yes |
| CRISPLD2     | 16:84853586-84943116   | 1.07183  | 1.78392  | 0.600829 | -0.73497 | -5.69975 | 1.20E-08 | 6.81E-07 | yes |
| USP54        | 10:75257295-75335433   | 0.849015 | 1.40984  | 0.602207 | -0.73167 | -5.88401 | 4.00E-09 | 2.55E-07 | yes |
| SLC7A5P2     | 16:21529213-21531765   | 2.26612  | 3.75014  | 0.604276 | -0.72672 | -5.99186 | 2.07E-09 | 1.42E-07 | yes |
| ACTA1        | 1:229566991-229569843  | 169.81   | 279.852  | 0.606785 | -0.72074 | -8.96577 | 0        | 0        | yes |
| PDLIM3       | 4:186421813-186456712  | 5.74601  | 9.46597  | 0.607018 | -0.72019 | -8.15494 | 4.44E-16 | 8.89E-14 | yes |
| NEGR1        | 1:71868624-72748277    | 3.99009  | 6.53264  | 0.610793 | -0.71124 | -9.44943 | 0        | 0        | yes |
| SLC7A5P1     | 16:29624423-29625038   | 12.368   | 20.2202  | 0.611666 | -0.70919 | -5.71927 | 1.07E-08 | 6.17E-07 | yes |
| MTHFD2       | 2:74425689-74442425    | 17.1286  | 27.9676  | 0.612444 | -0.70735 | -8.83224 | 0        | 0        | yes |
| COL12A1      | 6:75794041-75915623    | 35.3785  | 57.7294  | 0.612833 | -0.70643 | -7.92224 | 2.44E-15 | 4.51E-13 | yes |
| LOC284561    | 1:147751385-147763967  | 0.604675 | 0.983316 | 0.614935 | -0.7015  | -3.99698 | 6.42E-05 | 0.001594 | yes |
| HAS1         | 19:52216364-52227221   | 1.04949  | 1.70604  | 0.615161 | -0.70096 | -3.51112 | 0.000446 | 0.008138 | yes |
| CSRP2        | 12:77252495-77272799   | 7.05078  | 11.4299  | 0.616872 | -0.69696 | -5.50975 | 3.59E-08 | 1.83E-06 | yes |
| ADM          | 11:10326641-10328923   | 28.3778  | 45.8628  | 0.618754 | -0.69256 | -9.65167 | 0        | 0        | yes |

|              |                        |          |         |          |          |          |          |          |     |
|--------------|------------------------|----------|---------|----------|----------|----------|----------|----------|-----|
| C9orf3       | 9:97488950-97849500    | 2.28999  | 3.69514 | 0.61973  | -0.69029 | -5.53137 | 3.18E-08 | 1.64E-06 | yes |
| F3           | 1:94994731-95007413    | 24.497   | 39.5184 | 0.619888 | -0.68992 | -9.62199 | 0        | 0        | yes |
| VGLL3        | 3:86987122-87040257    | 1.95168  | 3.14827 | 0.619921 | -0.68984 | -8.98063 | 0        | 0        | yes |
| KIAA1199     | 15:81071711-81243999   | 69.922   | 112.79  | 0.619931 | -0.68982 | -7.49181 | 6.79E-14 | 1.04E-11 | yes |
| EDIL3        | 5:83238125-83680611    | 15.65    | 25.2432 | 0.619969 | -0.68973 | -9.64712 | 0        | 0        | yes |
| ITGB3        | 17:45331207-45390077   | 3.19285  | 5.14619 | 0.62043  | -0.68866 | -8.33993 | 0        | 0        | yes |
| ZNF503       | 10:77157601-77168740   | 2.94729  | 4.74955 | 0.620541 | -0.6884  | -6.91697 | 4.61E-12 | 5.04E-10 | yes |
| KCTD11       | 17:7255207-7258263     | 5.16098  | 8.30621 | 0.62134  | -0.68655 | -8.28321 | 2.22E-16 | 4.64E-14 | yes |
| BCYRN1       | 2:47562453-47562653    | 73.6527  | 118.024 | 0.624048 | -0.68027 | -3.61579 | 0.000299 | 0.005878 | yes |
| C3orf58      | 3:143690639-143711210  | 3.01281  | 4.82682 | 0.624181 | -0.67996 | -4.65806 | 3.19E-06 | 0.000108 | yes |
| PSAT1        | 9:80912058-80945009    | 12.79    | 20.4607 | 0.625101 | -0.67784 | -6.18064 | 6.38E-10 | 4.84E-08 | yes |
| TUFT1        | 1:151512780-151556059  | 1.53846  | 2.45135 | 0.627597 | -0.67209 | -3.89303 | 9.90E-05 | 0.002297 | yes |
| COL4A1       | 13:110801309-110959496 | 60.9007  | 96.567  | 0.630657 | -0.66507 | -7.56744 | 3.80E-14 | 6.08E-12 | yes |
| BDNF         | 11:27528398-27743605   | 5.11372  | 8.07897 | 0.632967 | -0.6598  | -5.48087 | 4.23E-08 | 2.14E-06 | yes |
| PCDH10       | 4:134070469-134112732  | 5.9721   | 9.41657 | 0.634212 | -0.65696 | -6.58229 | 4.63E-11 | 4.20E-09 | yes |
| LOC100287562 | 17:38596273-38613982   | 138.386  | 218.199 | 0.634219 | -0.65695 | -4.3166  | 1.58E-05 | 0.000461 | yes |
| CPE          | 4:166300096-166419482  | 2.44693  | 3.8548  | 0.634775 | -0.65568 | -5.41089 | 6.27E-08 | 3.00E-06 | yes |
| FAM124A      | 13:51796469-51858377   | 0.615036 | 0.96612 | 0.636604 | -0.65153 | -3.54149 | 0.000398 | 0.007426 | yes |
| PAWR         | 12:79985744-80084790   | 3.86918  | 6.07703 | 0.636689 | -0.65134 | -5.96291 | 2.48E-09 | 1.65E-07 | yes |
| FNDC1        | 6:159590428-159693140  | 27.3832  | 42.8348 | 0.639275 | -0.64549 | -8.2997  | 0        | 0        | yes |
| HAS3         | 16:69139466-69166493   | 1.92438  | 2.99925 | 0.64162  | -0.64021 | -3.6399  | 0.000273 | 0.00545  | yes |
| KCTD16       | 5:143550436-143856944  | 0.798758 | 1.24328 | 0.64246  | -0.63832 | -4.49643 | 6.91E-06 | 0.000221 | yes |
| ASS1         | 9:133320093-133376661  | 7.27298  | 11.3122 | 0.642932 | -0.63726 | -6.76087 | 1.37E-11 | 1.43E-09 | yes |
| FILIP1L      | 3:99536677-99897476    | 8.09264  | 12.5776 | 0.643417 | -0.63617 | -8.37938 | 0        | 0        | yes |
| MYOCD        | 17:12569206-12670651   | 3.96819  | 6.15508 | 0.644702 | -0.6333  | -6.64049 | 3.13E-11 | 2.94E-09 | yes |
| KCTD20       | 6:36358327-36458319    | 10.1864  | 15.7901 | 0.645113 | -0.63238 | -8.84233 | 0        | 0        | yes |
| FAM167A      | 8:11197145-11324276    | 2.35264  | 3.61814 | 0.650235 | -0.62097 | -6.27043 | 3.60E-10 | 2.83E-08 | yes |
| CYR61        | 1:86046443-86049650    | 108.658  | 167.038 | 0.650499 | -0.62038 | -7.71783 | 1.18E-14 | 2.02E-12 | yes |
| MAP3K8       | 10:30722865-30750761   | 1.27623  | 1.95935 | 0.651354 | -0.61849 | -4.18685 | 2.83E-05 | 0.000779 | yes |
| PPP1R3C      | 10:93388198-93392858   | 9.49528  | 14.5764 | 0.651415 | -0.61835 | -8.23758 | 2.22E-16 | 4.64E-14 | yes |
| NEXN         | 1:78347032-78409580    | 6.94943  | 10.6658 | 0.651562 | -0.61803 | -7.36445 | 1.78E-13 | 2.44E-11 | yes |
| NUDT18       | 8:21964382-21966932    | 2.10553  | 3.22624 | 0.652627 | -0.61567 | -3.61344 | 0.000302 | 0.005915 | yes |
| COL4A4       | 2:227867426-228029275  | 2.04299  | 3.12457 | 0.653847 | -0.61298 | -8.02856 | 8.88E-16 | 1.73E-13 | yes |
| SNTB1        | 8:121547984-121824309  | 1.52126  | 2.32632 | 0.653934 | -0.61278 | -5.76539 | 8.15E-09 | 4.89E-07 | yes |



|           |                        |          |         |          |          |          |          |          |     |
|-----------|------------------------|----------|---------|----------|----------|----------|----------|----------|-----|
| TPM1      | 15:63334837-63364114   | 421.155  | 643.819 | 0.654151 | -0.6123  | -5.36426 | 8.13E-08 | 3.77E-06 | yes |
| INHBA     | 7:41728600-41818976    | 55.8217  | 84.9592 | 0.657041 | -0.60594 | -8.13955 | 4.44E-16 | 8.89E-14 | yes |
| GABARAPL3 | 15:90889758-90892679   | 22.7483  | 34.5248 | 0.658897 | -0.60187 | -8.41196 | 0        | 0        | yes |
| ELN       | 7:73442426-73484237    | 6.78584  | 10.2781 | 0.660223 | -0.59897 | -5.68141 | 1.34E-08 | 7.52E-07 | yes |
| MYL3      | 3:46899356-46904973    | 4.30902  | 6.52644 | 0.66024  | -0.59894 | -3.7261  | 0.000194 | 0.004096 | yes |
| FER1L4    | 20:34146506-34195484   | 1.25189  | 1.88939 | 0.66259  | -0.59381 | -5.79708 | 6.75E-09 | 4.12E-07 | yes |
| HERPUD1   | 16:56965747-56977793   | 20.1093  | 30.3464 | 0.662659 | -0.59366 | -7.26201 | 3.81E-13 | 5.00E-11 | yes |
| BNIP3     | 10:133781203-133795435 | 70.3039  | 105.556 | 0.666034 | -0.58633 | -7.99743 | 1.33E-15 | 2.53E-13 | yes |
| FAM162A   | 3:122103022-122128961  | 24.7724  | 37.1675 | 0.666507 | -0.58531 | -7.14974 | 8.70E-13 | 1.08E-10 | yes |
| DHRS3     | 1:12627938-12677820    | 7.30747  | 10.9315 | 0.668478 | -0.58105 | -6.48052 | 9.14E-11 | 8.08E-09 | yes |
| INSIG2    | 2:118846049-118867597  | 6.83617  | 10.2132 | 0.669347 | -0.57917 | -7.13858 | 9.43E-13 | 1.16E-10 | yes |
| NUPR1     | 16:28548661-28550495   | 28.6662  | 42.8156 | 0.669527 | -0.57879 | -4.88329 | 1.04E-06 | 3.98E-05 | yes |
| PFKFB4    | 3:48555116-48594227    | 4.97112  | 7.42377 | 0.669622 | -0.57858 | -7.13003 | 1.00E-12 | 1.23E-10 | yes |
| PLOD2     | 3:145787226-145879282  | 231.589  | 345.014 | 0.671245 | -0.57509 | -4.70867 | 2.49E-06 | 8.68E-05 | yes |
| WDR69     | 2:228736326-228789026  | 3.49771  | 5.20606 | 0.671854 | -0.57378 | -4.55139 | 5.33E-06 | 0.000173 | yes |
| FST       | 5:52776263-52782304    | 15.2873  | 22.7127 | 0.673073 | -0.57117 | -6.0322  | 1.62E-09 | 1.14E-07 | yes |
| ALPK2     | 18:56148478-56296189   | 1.06674  | 1.58483 | 0.673094 | -0.57112 | -5.44792 | 5.10E-08 | 2.52E-06 | yes |
| POSTN     | 13:38136718-38172981   | 299.681  | 443.557 | 0.675631 | -0.56569 | -5.26911 | 1.37E-07 | 6.13E-06 | yes |
| MYL9      | 20:35169896-35178226   | 209.111  | 309.292 | 0.676096 | -0.5647  | -7.1265  | 1.03E-12 | 1.24E-10 | yes |
| CALD1     | 7:134464163-134655480  | 116.282  | 171.794 | 0.676869 | -0.56305 | -4.94776 | 7.51E-07 | 2.98E-05 | yes |
| VLDLR     | 9:2535651-2654485      | 4.82593  | 7.12623 | 0.677207 | -0.56233 | -4.85336 | 1.21E-06 | 4.57E-05 | yes |
| MYL10     | 7:101256604-101272576  | 22.9946  | 33.9314 | 0.677679 | -0.56133 | -7.15403 | 8.43E-13 | 1.06E-10 | yes |
| SIRPG     | 20:1609797-1638425     | 14.72    | 21.7044 | 0.678203 | -0.56021 | -7.43033 | 1.08E-13 | 1.59E-11 | yes |
| CSRP1     | 1:201452657-201476387  | 53.8389  | 79.2873 | 0.679036 | -0.55844 | -7.51099 | 5.86E-14 | 9.08E-12 | yes |
| ERMP1     | 9:5784571-5833081      | 0.877664 | 1.29236 | 0.679117 | -0.55827 | -4.14204 | 3.44E-05 | 0.000929 | yes |
| POTEM     | 14:19983953-20020272   | 58.2372  | 85.7506 | 0.679146 | -0.55821 | -6.40466 | 1.51E-10 | 1.28E-08 | yes |
| NUAK2     | 1:205271190-205290883  | 1.11567  | 1.64222 | 0.679367 | -0.55774 | -3.68097 | 0.000232 | 0.004762 | yes |
| SIRPB1    | 20:1545028-1600689     | 23.1855  | 34.1212 | 0.679504 | -0.55745 | -6.36939 | 1.90E-10 | 1.57E-08 | yes |
| CTPS      | 1:41445006-41478235    | 4.9542   | 7.27946 | 0.680572 | -0.55518 | -6.65621 | 2.81E-11 | 2.68E-09 | yes |
| TES       | 7:115850546-115898837  | 4.71821  | 6.9194  | 0.681881 | -0.55241 | -4.34327 | 1.40E-05 | 0.000415 | yes |
| CRIM1     | 2:36583369-36778278    | 32.3243  | 47.3953 | 0.682015 | -0.55212 | -7.12664 | 1.03E-12 | 1.24E-10 | yes |
| POTEKP    | 2:132349267-132384999  | 234.709  | 343.773 | 0.682744 | -0.55058 | -5.75743 | 8.54E-09 | 5.11E-07 | yes |
| FMOD      | 1:203309751-203320289  | 2.22705  | 3.26082 | 0.682972 | -0.5501  | -4.77878 | 1.76E-06 | 6.34E-05 | yes |
| LOC644936 | 5:79594903-79596297    | 217.316  | 317.968 | 0.683452 | -0.54909 | -6.72286 | 1.78E-11 | 1.81E-09 | yes |

|           |                        |         |         |          |          |          |          |          |     |
|-----------|------------------------|---------|---------|----------|----------|----------|----------|----------|-----|
| MYH10     | 17:8377529-8534036     | 19.95   | 29.1857 | 0.683554 | -0.54887 | -7.21753 | 5.29E-13 | 6.81E-11 | yes |
| SLC6A9    | 1:44457279-44497134    | 1.64985 | 2.41318 | 0.683683 | -0.5486  | -4.13244 | 3.59E-05 | 0.000959 | yes |
| GABARAPL1 | 12:10365488-10375727   | 24.6208 | 36.0053 | 0.68381  | -0.54833 | -7.67061 | 1.71E-14 | 2.86E-12 | yes |
| PHGDH     | 1:120254418-120286849  | 9.43262 | 13.7941 | 0.683816 | -0.54832 | -6.83696 | 8.09E-12 | 8.57E-10 | yes |
| LMO7      | 13:76194569-76434006   | 4.54695 | 6.64284 | 0.684489 | -0.5469  | -6.14449 | 8.02E-10 | 5.99E-08 | yes |
| MXI1      | 10:111967362-112047123 | 8.93061 | 13.0451 | 0.684595 | -0.54668 | -5.06542 | 4.08E-07 | 1.70E-05 | yes |
| IL8       | 4:74606222-74609433    | 1131.2  | 1651.84 | 0.684812 | -0.54622 | -4.83518 | 1.33E-06 | 4.97E-05 | yes |
| TPM2      | 9:35681989-35690053    | 240.637 | 351.275 | 0.685039 | -0.54574 | -6.58908 | 4.43E-11 | 4.06E-09 | yes |
| MTRNR2L1  | 17:22022436-22023991   | 315.626 | 460.427 | 0.685507 | -0.54476 | -6.12869 | 8.86E-10 | 6.58E-08 | yes |
| MTRNR2L6  | 7:142374130-142375525  | 200.78  | 292.87  | 0.68556  | -0.54464 | -6.7508  | 1.47E-11 | 1.52E-09 | yes |
| SLC1A5    | 19:47278139-47291842   | 20.6916 | 30.1766 | 0.685684 | -0.54439 | -4.80139 | 1.58E-06 | 5.75E-05 | yes |
| MTRNR2L2  | 5:79922044-80172634    | 483.808 | 704.411 | 0.686826 | -0.54198 | -5.98369 | 2.18E-09 | 1.47E-07 | yes |
| PDLIM5    | 4:95373037-95589377    | 13.4831 | 19.6296 | 0.686876 | -0.54188 | -7.00956 | 2.39E-12 | 2.76E-10 | yes |
| MTRNR2L8  | 11:10529433-10530723   | 454.426 | 660.587 | 0.687912 | -0.5397  | -5.90661 | 3.49E-09 | 2.26E-07 | yes |
| IL1A      | 2:113531491-113542971  | 25.3552 | 36.8025 | 0.688953 | -0.53752 | -7.44879 | 9.41E-14 | 1.40E-11 | yes |
| SLC2A4    | 17:7185053-7191367     | 1.57212 | 2.28063 | 0.689336 | -0.53672 | -4.02422 | 5.72E-05 | 0.001437 | yes |
| MXRA7     | 17:74671808-74707056   | 104.185 | 151.091 | 0.689551 | -0.53627 | -5.92806 | 3.07E-09 | 2.02E-07 | yes |
| POTEG     | 14:19553364-19584942   | 11.3717 | 16.4879 | 0.6897   | -0.53596 | -6.89989 | 5.20E-12 | 5.63E-10 | yes |
| GYS1      | 19:49471381-49496610   | 13.9779 | 20.2541 | 0.690127 | -0.53507 | -6.54893 | 5.80E-11 | 5.22E-09 | yes |
| POTEJ     | 2:131369105-131415450  | 205.867 | 297.79  | 0.691316 | -0.53258 | -5.63815 | 1.72E-08 | 9.49E-07 | yes |
| ADAM19    | 5:156904311-157002783  | 6.27006 | 9.06243 | 0.691874 | -0.53142 | -7.41765 | 1.19E-13 | 1.74E-11 | yes |
| SLC39A8   | 4:103172197-103266655  | 6.31605 | 9.11168 | 0.693182 | -0.52869 | -5.60722 | 2.06E-08 | 1.11E-06 | yes |
| MTRNR2L9  | 6:62284007-62284534    | 414.608 | 597.918 | 0.693419 | -0.5282  | -7.01141 | 2.36E-12 | 2.74E-10 | yes |
| DDIT4     | 10:74033676-74035797   | 64.2195 | 92.5042 | 0.694233 | -0.52651 | -7.15316 | 8.48E-13 | 1.06E-10 | yes |
| POTEI     | 2:131220388-131266808  | 211.813 | 305.072 | 0.694305 | -0.52636 | -5.51143 | 3.56E-08 | 1.82E-06 | yes |
| CNN2      | 19:1026297-1039064     | 20.5256 | 29.5608 | 0.694352 | -0.52626 | -7.36487 | 1.77E-13 | 2.44E-11 | yes |
| POTEF     | 2:130831107-130886795  | 185.661 | 267.319 | 0.69453  | -0.52589 | -5.34135 | 9.23E-08 | 4.21E-06 | yes |
| KIAA0564  | 13:42140960-42535221   | 2.40492 | 3.46198 | 0.694666 | -0.52561 | -6.36628 | 1.94E-10 | 1.59E-08 | yes |
| IGFBP4    | 17:38596273-38613982   | 96.2089 | 138.361 | 0.695347 | -0.5242  | -4.81513 | 1.47E-06 | 5.46E-05 | yes |
| NDUFA4L2  | 12:57623355-57634545   | 11.5391 | 16.5827 | 0.695852 | -0.52315 | -3.61783 | 0.000297 | 0.00584  | yes |
| PGK1      | X:77359665-77382324    | 150.923 | 216.75  | 0.6963   | -0.52222 | -5.50928 | 3.60E-08 | 1.83E-06 | yes |
| POTEE     | 2:131975923-132022416  | 228.934 | 328.605 | 0.696684 | -0.52142 | -5.32756 | 9.95E-08 | 4.48E-06 | yes |
| AMY1B     | 1:104230040-104238889  | 30.9262 | 44.3715 | 0.696983 | -0.5208  | -7.28303 | 3.26E-13 | 4.31E-11 | yes |
| DNAJB2    | 2:220144039-220151622  | 5.44206 | 7.80423 | 0.697322 | -0.5201  | -3.70536 | 0.000211 | 0.004408 | yes |

|              |                       |         |         |          |          |          |          |          |     |
|--------------|-----------------------|---------|---------|----------|----------|----------|----------|----------|-----|
| PGK2         | 6:49753363-49755053   | 163.641 | 234.233 | 0.698625 | -0.51741 | -6.39885 | 1.57E-10 | 1.31E-08 | yes |
| SIRPA        | 20:1874812-1920540    | 23.8587 | 34.1101 | 0.699461 | -0.51568 | -6.91784 | 4.59E-12 | 5.04E-10 | yes |
| LOC124685    | 17:69617121-69617577  | 694.493 | 992.871 | 0.69948  | -0.51565 | -6.64922 | 2.95E-11 | 2.79E-09 | yes |
| RNF41        | 12:56596287-56615753  | 3.55152 | 5.07192 | 0.700232 | -0.5141  | -4.17103 | 3.03E-05 | 0.000829 | yes |
| LOX          | 5:121398889-121414055 | 92.4893 | 132.054 | 0.70039  | -0.51377 | -5.56759 | 2.58E-08 | 1.36E-06 | yes |
| CBS          | 21:44473300-44496472  | 5.7311  | 8.18095 | 0.700542 | -0.51346 | -5.87889 | 4.13E-09 | 2.62E-07 | yes |
| MYL6         | 12:56552044-56555366  | 363.978 | 519.378 | 0.700796 | -0.51293 | -5.18794 | 2.13E-07 | 9.15E-06 | yes |
| CTDSPL2      | 15:44719578-44819430  | 1.61778 | 2.30703 | 0.701239 | -0.51202 | -4.85538 | 1.20E-06 | 4.54E-05 | yes |
| LOC648740    | 1:104068577-104122151 | 217.108 | 309.331 | 0.701863 | -0.51074 | -5.82979 | 5.55E-09 | 3.48E-07 | yes |
| MYL1         | 2:211154867-211179895 | 43.5422 | 61.9576 | 0.702774 | -0.50887 | -6.9822  | 2.91E-12 | 3.30E-10 | yes |
| STBD1        | 4:77227676-77232283   | 3.88109 | 5.51494 | 0.703741 | -0.50688 | -5.08306 | 3.71E-07 | 1.56E-05 | yes |
| LOC644961    | 1:27648635-27662891   | 174.846 | 248.283 | 0.704221 | -0.5059  | -5.63569 | 1.74E-08 | 9.59E-07 | yes |
| ACTG1        | 17:79476996-79479892  | 635.316 | 901.546 | 0.704696 | -0.50493 | -4.80225 | 1.57E-06 | 5.74E-05 | yes |
| SLC1A4       | 2:65215578-65250999   | 1.77829 | 2.52281 | 0.704885 | -0.50454 | -4.29583 | 1.74E-05 | 0.000502 | yes |
| LOC148709    | 1:202830881-202844369 | 18.1512 | 25.7339 | 0.705342 | -0.50361 | -7.03393 | 2.01E-12 | 2.37E-10 | yes |
| AMY1C        | 1:104292440-104301310 | 33.8166 | 47.8485 | 0.706743 | -0.50074 | -6.98765 | 2.80E-12 | 3.20E-10 | yes |
| INMT         | 7:30791750-30932002   | 6.11368 | 8.645   | 0.707193 | -0.49982 | -5.82419 | 5.74E-09 | 3.58E-07 | yes |
| THBS4        | 5:79331169-79379110   | 2.14899 | 3.03703 | 0.707596 | -0.499   | -4.40494 | 1.06E-05 | 0.000325 | yes |
| MTRNR2L10    | X:55207823-55208944   | 65.1668 | 92.078  | 0.707735 | -0.49872 | -6.94671 | 3.74E-12 | 4.18E-10 | yes |
| PPFIA4       | 1:203020310-203047864 | 2.18069 | 3.08083 | 0.707825 | -0.49853 | -5.32947 | 9.85E-08 | 4.45E-06 | yes |
| PLIN2        | 9:19115758-19127604   | 102.091 | 144.135 | 0.708301 | -0.49757 | -6.2228  | 4.88E-10 | 3.78E-08 | yes |
| MYL4         | 17:45286427-45301045  | 56.7508 | 79.9754 | 0.709603 | -0.49492 | -6.89904 | 5.24E-12 | 5.63E-10 | yes |
| EPDR1        | 7:37960162-37991543   | 5.6807  | 7.99754 | 0.710306 | -0.49349 | -5.72924 | 1.01E-08 | 5.86E-07 | yes |
| ITGA1        | 5:52083773-52249485   | 5.5866  | 7.85624 | 0.711104 | -0.49187 | -5.35478 | 8.57E-08 | 3.94E-06 | yes |
| MTRNR2L7     | 10:37890365-37891859  | 17.7076 | 24.8957 | 0.711271 | -0.49153 | -6.52987 | 6.58E-11 | 5.89E-09 | yes |
| STC2         | 5:172741725-172756506 | 49.1266 | 69.0484 | 0.711481 | -0.4911  | -6.04539 | 1.49E-09 | 1.06E-07 | yes |
| ACTB         | 7:5566778-5573677     | 746.834 | 1049.64 | 0.711514 | -0.49104 | -4.3976  | 1.09E-05 | 0.000333 | yes |
| FERMT2       | 14:53323988-53417815  | 16.783  | 23.5411 | 0.712923 | -0.48818 | -6.72367 | 1.77E-11 | 1.81E-09 | yes |
| GAPDH        | 12:6643656-6647536    | 881.806 | 1236.83 | 0.712957 | -0.48811 | -4.76787 | 1.86E-06 | 6.64E-05 | yes |
| AMY1A        | 1:104198140-104207173 | 29.5685 | 41.4382 | 0.713557 | -0.4869  | -6.70534 | 2.01E-11 | 2.00E-09 | yes |
| WNT5A        | 3:55499742-55521331   | 9.90302 | 13.8681 | 0.714086 | -0.48583 | -6.77592 | 1.24E-11 | 1.30E-09 | yes |
| LOC100130331 | 1:238025474-238091621 | 92.8914 | 130.056 | 0.714242 | -0.48552 | -5.91403 | 3.34E-09 | 2.18E-07 | yes |
| CD55         | 1:207494816-207534311 | 6.16526 | 8.63012 | 0.714389 | -0.48522 | -4.70244 | 2.57E-06 | 8.93E-05 | yes |
| ZNF281       | 1:200375419-200379166 | 7.09456 | 9.92682 | 0.714686 | -0.48462 | -6.46917 | 9.85E-11 | 8.61E-09 | yes |

|          |                        |         |         |          |          |          |          |          |     |
|----------|------------------------|---------|---------|----------|----------|----------|----------|----------|-----|
| FAM36A   | 1:244998638-245010243  | 4.52396 | 6.32551 | 0.715193 | -0.4836  | -3.84859 | 0.000119 | 0.002695 | yes |
| RBM3     | X:48432740-48439553    | 8.77194 | 12.253  | 0.715901 | -0.48217 | -6.72081 | 1.81E-11 | 1.82E-09 | yes |
| CNN3     | 1:95362506-95392735    | 37.0523 | 51.7519 | 0.71596  | -0.48205 | -6.68105 | 2.37E-11 | 2.28E-09 | yes |
| ADAMTS12 | 5:33527285-33892124    | 17.3835 | 24.2747 | 0.716116 | -0.48173 | -6.62665 | 3.43E-11 | 3.19E-09 | yes |
| THBS1    | 15:39873279-39889668   | 713.254 | 995.572 | 0.716426 | -0.48111 | -3.66723 | 0.000245 | 0.004961 | yes |
| WSB1     | 17:25621105-25640645   | 24.1835 | 33.7399 | 0.716763 | -0.48043 | -6.68282 | 2.34E-11 | 2.27E-09 | yes |
| ITGBL1   | 13:102104965-102368794 | 15.908  | 22.1908 | 0.716874 | -0.48021 | -6.69122 | 2.21E-11 | 2.15E-09 | yes |
| BAG2     | 6:57037103-57050013    | 6.95278 | 9.68296 | 0.718043 | -0.47786 | -5.44403 | 5.21E-08 | 2.57E-06 | yes |
| MTRNR2L5 | 10:57358749-57360488   | 17.1633 | 23.8793 | 0.718752 | -0.47643 | -6.47177 | 9.69E-11 | 8.51E-09 | yes |
| MTRNR2L4 | 16:3421052-3422283     | 17.9126 | 24.879  | 0.719989 | -0.47395 | -6.00409 | 1.92E-09 | 1.33E-07 | yes |
| ENO2     | 12:7023613-7032859     | 58.5167 | 81.2349 | 0.720339 | -0.47325 | -6.30934 | 2.80E-10 | 2.24E-08 | yes |
| SNTA1    | 20:31995762-32031698   | 2.32953 | 3.22926 | 0.721382 | -0.47116 | -3.6294  | 0.000284 | 0.00563  | yes |
| LDHAL6B  | 15:59428562-59665071   | 57.4091 | 79.5247 | 0.721903 | -0.47012 | -5.74933 | 8.96E-09 | 5.31E-07 | yes |
| DDX41    | 5:176938577-176943967  | 6.93934 | 9.60042 | 0.722816 | -0.4683  | -5.37245 | 7.77E-08 | 3.65E-06 | yes |
| TST      | 22:37406905-37415491   | 6.81583 | 9.42903 | 0.722856 | -0.46822 | -4.05961 | 4.92E-05 | 0.00126  | yes |
| RGNEF    | 5:72921982-73237818    | 1.1292  | 1.5598  | 0.723939 | -0.46606 | -4.20287 | 2.64E-05 | 0.000737 | yes |
| MTRNR2L3 | 20:55926144-55953519   | 61.139  | 84.3901 | 0.724481 | -0.46498 | -6.18736 | 6.12E-10 | 4.66E-08 | yes |
| C6orf145 | 6:3722835-3752246      | 10.1143 | 13.9584 | 0.724603 | -0.46474 | -6.01078 | 1.85E-09 | 1.28E-07 | yes |
| LDHC     | 11:18433852-18472793   | 78.4234 | 108.204 | 0.724774 | -0.4644  | -6.39934 | 1.56E-10 | 1.31E-08 | yes |
| BNIP3L   | 8:26240522-26270644    | 44.8552 | 61.8854 | 0.724811 | -0.46432 | -6.12013 | 9.35E-10 | 6.90E-08 | yes |
| SCAND2   | 15:85174690-85185694   | 1.40308 | 1.93568 | 0.724851 | -0.46424 | -3.92852 | 8.55E-05 | 0.002032 | yes |
| SIAH2    | 3:150458909-150481263  | 4.25221 | 5.86379 | 0.725164 | -0.46362 | -4.90023 | 9.57E-07 | 3.72E-05 | yes |
| LDHA     | 11:18415935-18429765   | 332.797 | 458.864 | 0.725263 | -0.46342 | -4.79294 | 1.64E-06 | 5.96E-05 | yes |
| OAS3     | 12:113376248-113411054 | 8.88438 | 12.2456 | 0.725516 | -0.46292 | -6.4492  | 1.12E-10 | 9.76E-09 | yes |
| TMEM45A  | 3:100211462-100296285  | 26.4281 | 36.4189 | 0.72567  | -0.46261 | -6.44192 | 1.18E-10 | 1.02E-08 | yes |
| MYL5     | 4:671710-682973        | 24.6617 | 33.9767 | 0.725842 | -0.46227 | -4.93479 | 8.02E-07 | 3.17E-05 | yes |
| ATF4     | 22:39916568-39918691   | 99.2281 | 136.693 | 0.725919 | -0.46212 | -6.08205 | 1.19E-09 | 8.55E-08 | yes |
| FOXD1    | 5:72742082-72744352    | 5.49426 | 7.54709 | 0.727997 | -0.458   | -5.00162 | 5.68E-07 | 2.30E-05 | yes |
| RCOR1    | 14:103059232-103196913 | 2.44332 | 3.35459 | 0.728351 | -0.45729 | -5.21699 | 1.82E-07 | 7.94E-06 | yes |
| ZNF395   | 8:28203101-28243977    | 6.28094 | 8.62316 | 0.72838  | -0.45724 | -6.26505 | 3.73E-10 | 2.92E-08 | yes |
| IDH2     | 15:90627209-90645708   | 3.94547 | 5.41366 | 0.728799 | -0.45641 | -3.86399 | 0.000112 | 0.002543 | yes |
| NDUFA4   | 7:10971579-10979813    | 13.2671 | 18.1849 | 0.729567 | -0.45489 | -6.10637 | 1.02E-09 | 7.45E-08 | yes |
| LOXL3    | 2:74753774-74784678    | 19.3264 | 26.4687 | 0.730161 | -0.45371 | -5.24362 | 1.57E-07 | 6.98E-06 | yes |
| ARID5B   | 10:63661012-63856707   | 6.10666 | 8.3583  | 0.73061  | -0.45283 | -6.33244 | 2.41E-10 | 1.95E-08 | yes |

|              |                        |         |         |          |          |          |          |          |     |
|--------------|------------------------|---------|---------|----------|----------|----------|----------|----------|-----|
| GPR176       | 15:40092930-40213093   | 15.6113 | 21.3386 | 0.731599 | -0.45087 | -6.30487 | 2.88E-10 | 2.30E-08 | yes |
| SCG5         | 15:32933869-32989298   | 9.18554 | 12.5503 | 0.731898 | -0.45029 | -4.58458 | 4.55E-06 | 0.00015  | yes |
| STON1        | 2:48757063-49003656    | 1.12055 | 1.52974 | 0.73251  | -0.44908 | -3.57057 | 0.000356 | 0.006784 | yes |
| PTTG1IP      | 21:46269499-46293818   | 39.5738 | 53.9889 | 0.732999 | -0.44812 | -6.08351 | 1.18E-09 | 8.51E-08 | yes |
| FGF2         | 4:123747862-123844123  | 82.8179 | 112.895 | 0.733583 | -0.44697 | -4.81131 | 1.50E-06 | 5.51E-05 | yes |
| DPYSL4       | 10:134000413-134019280 | 2.95641 | 4.02999 | 0.733602 | -0.44693 | -4.1811  | 2.90E-05 | 0.000796 | yes |
| LIMS2        | 2:128395995-128439360  | 5.78178 | 7.8771  | 0.733999 | -0.44615 | -4.10525 | 4.04E-05 | 0.001062 | yes |
| EIF4EBP1     | 8:37888019-37917883    | 17.2904 | 23.5477 | 0.734271 | -0.44561 | -4.86268 | 1.16E-06 | 4.40E-05 | yes |
| HEG1         | 3:124684553-124774802  | 22.7278 | 30.9499 | 0.734342 | -0.44548 | -5.66773 | 1.45E-08 | 8.08E-07 | yes |
| ATF5         | 19:50392910-50437193   | 17.0538 | 23.218  | 0.734508 | -0.44515 | -5.01891 | 5.20E-07 | 2.11E-05 | yes |
| MYL6B        | 12:56546203-56551771   | 94.8446 | 128.983 | 0.735326 | -0.44354 | -6.10394 | 1.03E-09 | 7.53E-08 | yes |
| TRIB3        | 20:361307-378203       | 6.46291 | 8.77332 | 0.736655 | -0.44094 | -5.20037 | 1.99E-07 | 8.61E-06 | yes |
| BTG1         | 12:92534053-92539673   | 5.99009 | 8.13096 | 0.736701 | -0.44085 | -5.98638 | 2.15E-09 | 1.45E-07 | yes |
| RAB23        | 6:57053580-57087078    | 10.1472 | 13.7442 | 0.73829  | -0.43774 | -4.40525 | 1.06E-05 | 0.000325 | yes |
| SCD          | 10:102106771-102124588 | 22.6416 | 30.667  | 0.738305 | -0.43771 | -5.6824  | 1.33E-08 | 7.50E-07 | yes |
| ANKZF1       | 2:220094478-220101391  | 3.99551 | 5.41105 | 0.738398 | -0.43753 | -3.5656  | 0.000363 | 0.006837 | yes |
| PDLIM2       | 8:22436253-22455538    | 12.307  | 16.6427 | 0.739483 | -0.43541 | -3.75393 | 0.000174 | 0.003731 | yes |
| ITGA4        | 2:182321618-182521834  | 3.08936 | 4.17742 | 0.739538 | -0.4353  | -5.36933 | 7.90E-08 | 3.69E-06 | yes |
| BOK          | 2:242483798-242513553  | 15.0956 | 20.3868 | 0.74046  | -0.43351 | -6.0192  | 1.75E-09 | 1.23E-07 | yes |
| HAS2         | 8:122625270-122657565  | 35.6404 | 48.1133 | 0.74076  | -0.43292 | -5.73513 | 9.74E-09 | 5.71E-07 | yes |
| PKDCC        | 2:42275160-42285668    | 4.55051 | 6.14058 | 0.741055 | -0.43235 | -4.58378 | 4.57E-06 | 0.00015  | yes |
| FSTL1        | 3:120113060-120169918  | 249.864 | 336.954 | 0.741537 | -0.43141 | -4.26344 | 2.01E-05 | 0.000575 | yes |
| JMJD6        | 17:74708913-74722881   | 6.75535 | 9.10033 | 0.742319 | -0.42989 | -4.0358  | 5.44E-05 | 0.001378 | yes |
| LDHAL6A      | 11:18477373-18501147   | 31.9483 | 43.0274 | 0.742511 | -0.42952 | -5.99032 | 2.09E-09 | 1.42E-07 | yes |
| AVEN         | 15:34158427-34357287   | 5.07971 | 6.83911 | 0.742744 | -0.42906 | -3.82185 | 0.000132 | 0.002968 | yes |
| SRGN         | 10:70847827-70864567   | 91.0891 | 122.631 | 0.74279  | -0.42897 | -5.84309 | 5.12E-09 | 3.22E-07 | yes |
| ERO1L        | 14:53108604-53162419   | 21.9603 | 29.519  | 0.743938 | -0.42675 | -5.92141 | 3.19E-09 | 2.09E-07 | yes |
| MEGF6        | 1:3404505-3528059      | 2.62333 | 3.52546 | 0.74411  | -0.42641 | -5.41309 | 6.19E-08 | 2.99E-06 | yes |
| C12orf11     | 12:27058111-27091254   | 3.5294  | 4.73848 | 0.744838 | -0.425   | -4.4035  | 1.07E-05 | 0.000326 | yes |
| ITGA11       | 15:68594041-68724492   | 26.5191 | 35.5967 | 0.744988 | -0.42471 | -5.67926 | 1.35E-08 | 7.58E-07 | yes |
| LOC100335030 | 12:49760687-49921207   | 4.36356 | 5.85589 | 0.745157 | -0.42438 | -3.91869 | 8.90E-05 | 0.00211  | yes |
| LOC653562    | 16:33778248-33786529   | 7.77623 | 10.4241 | 0.745986 | -0.42278 | -5.32968 | 9.84E-08 | 4.45E-06 | yes |
| CEBPG        | 19:33864608-33873592   | 3.41538 | 4.5752  | 0.746499 | -0.42179 | -4.68325 | 2.82E-06 | 9.71E-05 | yes |
| SERPINE1     | 7:100770378-100782547  | 784.353 | 1050.71 | 0.746498 | -0.42179 | -3.54691 | 0.00039  | 0.007293 | yes |

|           |                        |         |         |          |          |          |          |          |     |
|-----------|------------------------|---------|---------|----------|----------|----------|----------|----------|-----|
| ENO3      | 17:4854383-4860426     | 81.2582 | 108.839 | 0.746591 | -0.42161 | -5.73228 | 9.91E-09 | 5.78E-07 | yes |
| LIMA1     | 12:50569562-50677353   | 27.9841 | 37.4573 | 0.747093 | -0.42064 | -5.13241 | 2.86E-07 | 1.22E-05 | yes |
| KCNK6     | 19:38810483-38819654   | 2.74194 | 3.66987 | 0.747149 | -0.42053 | -3.74078 | 0.000183 | 0.003887 | yes |
| NMD3      | 3:160939098-160969795  | 6.41008 | 8.57699 | 0.747358 | -0.42013 | -5.11344 | 3.16E-07 | 1.34E-05 | yes |
| FLNA      | X:153576899-153603006  | 84.9516 | 113.64  | 0.74755  | -0.41976 | -4.32823 | 1.50E-05 | 0.000442 | yes |
| CCDC80    | 3:112323406-112359977  | 52.8051 | 70.5544 | 0.748431 | -0.41806 | -5.23976 | 1.61E-07 | 7.11E-06 | yes |
| SLC2A1    | 1:43391045-43449029    | 19.1205 | 25.5398 | 0.748655 | -0.41763 | -5.7937  | 6.89E-09 | 4.19E-07 | yes |
| SLC6A10P  | 16:32888796-32896463   | 4.64381 | 6.19981 | 0.749025 | -0.41692 | -5.13103 | 2.88E-07 | 1.22E-05 | yes |
| PYGL      | 14:51371934-51411248   | 7.45404 | 9.94779 | 0.749316 | -0.41635 | -5.20668 | 1.92E-07 | 8.34E-06 | yes |
| TMEM47    | X:34645180-34675405    | 12.3334 | 16.4443 | 0.750011 | -0.41502 | -5.80634 | 6.39E-09 | 3.91E-07 | yes |
| SDC2      | 8:97505881-97624037    | 6.82852 | 9.09707 | 0.750628 | -0.41383 | -5.45892 | 4.79E-08 | 2.40E-06 | yes |
| FNIP2     | 4:159690181-159956333  | 1.49575 | 1.99121 | 0.751176 | -0.41278 | -4.0015  | 6.29E-05 | 0.001572 | yes |
| RIOK3     | 18:21032786-21063101   | 7.65195 | 10.1832 | 0.751429 | -0.41229 | -5.65793 | 1.53E-08 | 8.52E-07 | yes |
| MTHFD1L   | 6:151186814-151473355  | 8.97544 | 11.9345 | 0.752058 | -0.41108 | -3.62358 | 0.000291 | 0.005727 | yes |
| COL4A2    | 13:110959630-111165374 | 51.8889 | 68.9528 | 0.752528 | -0.41018 | -4.90194 | 9.49E-07 | 3.70E-05 | yes |
| SNHG5     | 6:86386724-86388451    | 74.2457 | 98.647  | 0.75264  | -0.40997 | -5.41047 | 6.29E-08 | 3.00E-06 | yes |
| ITGB8     | 7:20367923-20455382    | 2.72463 | 3.61584 | 0.753526 | -0.40827 | -5.42006 | 5.96E-08 | 2.89E-06 | yes |
| PHF17     | 4:129730778-129796379  | 1.32689 | 1.75975 | 0.754022 | -0.40732 | -3.5293  | 0.000417 | 0.007696 | yes |
| DUSP1     | 5:172195092-172198203  | 13.9021 | 18.4214 | 0.754671 | -0.40608 | -5.45833 | 4.81E-08 | 2.40E-06 | yes |
| SLC38A1   | 12:46576837-46663208   | 7.62296 | 10.1009 | 0.754681 | -0.40606 | -4.22841 | 2.35E-05 | 0.000663 | yes |
| DSTN      | 20:17550598-17588652   | 83.7018 | 110.852 | 0.755077 | -0.4053  | -5.4121  | 6.23E-08 | 2.99E-06 | yes |
| DNAJB9    | 7:108210188-108215294  | 10.9017 | 14.4204 | 0.755992 | -0.40356 | -5.44266 | 5.25E-08 | 2.57E-06 | yes |
| RORA      | 15:60780482-61521502   | 2.43902 | 3.22561 | 0.756142 | -0.40327 | -5.03713 | 4.73E-07 | 1.94E-05 | yes |
| FTX       | X:73164158-73513409    | 6.19788 | 8.194   | 0.756392 | -0.40279 | -3.69643 | 0.000219 | 0.004527 | yes |
| ENAH      | 1:225674533-225840845  | 4.78026 | 6.31881 | 0.756513 | -0.40256 | -5.60554 | 2.08E-08 | 1.12E-06 | yes |
| FAM57A    | 17:635846-646075       | 5.33553 | 7.04855 | 0.756968 | -0.40169 | -4.18701 | 2.83E-05 | 0.000779 | yes |
| DSTNP2    | 12:6993845-6994950     | 78.1724 | 103.265 | 0.757008 | -0.40162 | -5.5688  | 2.57E-08 | 1.35E-06 | yes |
| NNMT      | 11:114166534-114183238 | 41.8429 | 55.2189 | 0.757764 | -0.40018 | -5.57951 | 2.41E-08 | 1.28E-06 | yes |
| LOC729454 | 3:39244497-39256163    | 124.703 | 164.428 | 0.758405 | -0.39896 | -5.57657 | 2.45E-08 | 1.30E-06 | yes |
| RPSA      | 3:39448203-39454033    | 140.907 | 185.686 | 0.758846 | -0.39812 | -5.18888 | 2.12E-07 | 9.13E-06 | yes |
| SLC6A8    | X:152953751-152962048  | 8.78341 | 11.5654 | 0.759456 | -0.39696 | -4.38915 | 1.14E-05 | 0.000346 | yes |
| EDARADD   | 1:236557679-236648008  | 203.46  | 267.796 | 0.759757 | -0.39639 | -4.32237 | 1.54E-05 | 0.000452 | yes |
| RPL10L    | 14:47120215-47121028   | 212.622 | 279.811 | 0.759877 | -0.39616 | -5.29079 | 1.22E-07 | 5.47E-06 | yes |
| TPI1P2    | 7:128695276-128697293  | 158.547 | 208.252 | 0.761323 | -0.39342 | -4.76894 | 1.85E-06 | 6.62E-05 | yes |

|           |                        |         |         |          |          |          |          |          |     |
|-----------|------------------------|---------|---------|----------|----------|----------|----------|----------|-----|
| TPI1      | 12:6976583-6982521     | 213.361 | 280.081 | 0.761783 | -0.39255 | -4.85409 | 1.21E-06 | 4.56E-05 | yes |
| CBLB      | 3:105377108-105587887  | 5.01342 | 6.57946 | 0.76198  | -0.39217 | -4.97291 | 6.60E-07 | 2.63E-05 | yes |
| PPP1R3B   | 8:8993763-9009152      | 6.29082 | 8.25413 | 0.762142 | -0.39187 | -5.55802 | 2.73E-08 | 1.42E-06 | yes |
| RPL10     | X:153626570-153650065  | 74.4107 | 97.5549 | 0.762757 | -0.3907  | -4.89797 | 9.68E-07 | 3.74E-05 | yes |
| ENO1      | 1:8921058-8939944      | 242.002 | 317.156 | 0.763038 | -0.39017 | -4.25296 | 2.11E-05 | 0.0006   | yes |
| PDK1      | 2:173420778-173463862  | 2.85911 | 3.7465  | 0.763142 | -0.38998 | -4.37032 | 1.24E-05 | 0.000373 | yes |
| TPI1P3    | 6:116262692-116381921  | 290.272 | 380.322 | 0.763227 | -0.38982 | -4.6936  | 2.68E-06 | 9.28E-05 | yes |
| ANKRD13A  | 12:110437234-110477237 | 9.93568 | 13.0067 | 0.763889 | -0.38856 | -5.41347 | 6.18E-08 | 2.99E-06 | yes |
| RPSAP58   | 19:23945815-24010937   | 150.47  | 196.744 | 0.764801 | -0.38684 | -5.00108 | 5.70E-07 | 2.30E-05 | yes |
| RPSAP9    | 9:79013514-79014954    | 108.118 | 141.364 | 0.76482  | -0.38681 | -5.15545 | 2.53E-07 | 1.08E-05 | yes |
| TNS1      | 2:218664511-218808796  | 17.0494 | 22.29   | 0.76489  | -0.38668 | -5.02855 | 4.94E-07 | 2.02E-05 | yes |
| MME       | 3:154797435-154901518  | 64.0046 | 83.5975 | 0.765628 | -0.38528 | -4.00486 | 6.21E-05 | 0.001552 | yes |
| AK4       | 1:65613231-65697828    | 7.52971 | 9.81661 | 0.767038 | -0.38263 | -4.55458 | 5.25E-06 | 0.000171 | yes |
| PIK3IP1   | 22:31677578-31688520   | 3.8392  | 5.00506 | 0.767064 | -0.38258 | -3.76682 | 0.000165 | 0.003582 | yes |
| MYL12A    | 18:3247527-3261845     | 220.754 | 287.779 | 0.767096 | -0.38252 | -4.74412 | 2.09E-06 | 7.41E-05 | yes |
| KCNMB3    | 3:178957536-178984838  | 8.24445 | 10.7476 | 0.767097 | -0.38252 | -4.11035 | 3.95E-05 | 0.001043 | yes |
| SMYD2     | 1:214454564-214510477  | 5.5927  | 7.28827 | 0.767356 | -0.38203 | -3.71416 | 0.000204 | 0.004288 | yes |
| GARS      | 7:30634180-30673649    | 37.1564 | 48.3956 | 0.767764 | -0.38127 | -5.21508 | 1.84E-07 | 8.00E-06 | yes |
| LOC283693 | 15:83394631-83408532   | 8.79271 | 11.4507 | 0.767875 | -0.38106 | -4.31084 | 1.63E-05 | 0.000471 | yes |
| C4orf3    | 4:120217573-120225600  | 27.7163 | 36.0425 | 0.768989 | -0.37896 | -5.23786 | 1.62E-07 | 7.16E-06 | yes |
| FLNB      | 3:57994126-58157982    | 24.0884 | 31.2704 | 0.770326 | -0.37646 | -3.79526 | 0.000147 | 0.003254 | yes |
| HSPB6     | 19:36245469-36247930   | 8.47452 | 10.9939 | 0.770838 | -0.3755  | -3.98286 | 6.81E-05 | 0.00168  | yes |
| HSP90B3P  | 1:92100567-92109335    | 192.945 | 250.121 | 0.771407 | -0.37444 | -4.71443 | 2.42E-06 | 8.48E-05 | yes |
| PYCR1     | 17:79890266-79894968   | 11.2343 | 14.5327 | 0.773036 | -0.37139 | -4.81151 | 1.50E-06 | 5.51E-05 | yes |
| GAS5      | 1:173832385-173837125  | 24.6607 | 31.9007 | 0.773046 | -0.37137 | -3.89007 | 0.0001   | 0.002321 | yes |
| HSP90B1   | 12:104324188-104341703 | 173.276 | 224.133 | 0.773095 | -0.37128 | -4.17314 | 3.00E-05 | 0.000823 | yes |
| SGK1      | 6:134490383-134639196  | 22.1743 | 28.6393 | 0.774261 | -0.36911 | -4.6979  | 2.63E-06 | 9.10E-05 | yes |
| PAQR7     | 1:26187974-26197744    | 2.76596 | 3.57211 | 0.774321 | -0.369   | -3.49585 | 0.000473 | 0.008564 | yes |
| COL5A2    | 2:189896640-190044605  | 89.3504 | 115.31  | 0.774871 | -0.36797 | -3.90128 | 9.57E-05 | 0.002238 | yes |
| P4HA1     | 10:74766974-74856732   | 86.8348 | 112.057 | 0.774916 | -0.36789 | -4.54111 | 5.60E-06 | 0.000181 | yes |
| ATP2A2    | 12:110719031-110788898 | 23.4274 | 30.2263 | 0.775067 | -0.36761 | -3.567   | 0.000361 | 0.006834 | yes |
| PGRMC2    | 4:129179949-129209984  | 9.90028 | 12.7706 | 0.77524  | -0.36729 | -3.94684 | 7.92E-05 | 0.001895 | yes |
| IGFBP5    | 2:217536827-217560272  | 36.7526 | 47.3996 | 0.775378 | -0.36703 | -4.62704 | 3.71E-06 | 0.000124 | yes |
| MYL12B    | 18:3262110-3278282     | 304.183 | 392.277 | 0.775429 | -0.36693 | -4.6133  | 3.96E-06 | 0.000131 | yes |

|           |                        |         |         |          |          |          |          |          |     |
|-----------|------------------------|---------|---------|----------|----------|----------|----------|----------|-----|
| RAB8B     | 15:63481727-63559975   | 7.7359  | 9.97227 | 0.775741 | -0.36635 | -5.09832 | 3.43E-07 | 1.44E-05 | yes |
| B4GALT1   | 9:33110638-33167356    | 49.4304 | 63.7119 | 0.775843 | -0.36616 | -4.68916 | 2.74E-06 | 9.46E-05 | yes |
| GBE1      | 3:81538849-81810950    | 49.3895 | 63.6351 | 0.776136 | -0.36562 | -4.84865 | 1.24E-06 | 4.65E-05 | yes |
| MYADM     | 19:54369610-54379689   | 46.4151 | 59.7578 | 0.77672  | -0.36453 | -4.11889 | 3.81E-05 | 0.001012 | yes |
| DDX50     | 10:70661033-70706603   | 5.61742 | 7.23203 | 0.776742 | -0.36449 | -4.14013 | 3.47E-05 | 0.000935 | yes |
| SLC3A2    | 11:62623483-62656355   | 26.7448 | 34.4284 | 0.776824 | -0.36434 | -3.80498 | 0.000142 | 0.003134 | yes |
| CD200     | 3:112051915-112085485  | 16.1955 | 20.8462 | 0.776904 | -0.36419 | -4.80079 | 1.58E-06 | 5.75E-05 | yes |
| MYCT1     | 6:153019029-153045717  | 5.79749 | 7.45964 | 0.777181 | -0.36368 | -4.43116 | 9.37E-06 | 0.000292 | yes |
| MIR22HG   | 17:1614797-1619566     | 12.4894 | 16.0686 | 0.777255 | -0.36354 | -3.7597  | 0.00017  | 0.003664 | yes |
| TXNDC12   | 1:52485802-52521047    | 13.2778 | 17.0825 | 0.777275 | -0.3635  | -4.40677 | 1.05E-05 | 0.000324 | yes |
| PLP2      | X:49028183-49031469    | 22.0844 | 28.3946 | 0.777768 | -0.36259 | -4.57444 | 4.77E-06 | 0.000157 | yes |
| AGPAT5    | 8:6565877-6619024      | 2.05714 | 2.64406 | 0.778023 | -0.36211 | -3.84148 | 0.000122 | 0.002757 | yes |
| FLJ44635  | X:71364033-71381600    | 242.731 | 311.943 | 0.778126 | -0.36192 | -3.99042 | 6.60E-05 | 0.001633 | yes |
| UGCG      | 9:114659205-114695439  | 11.5    | 14.7705 | 0.778579 | -0.36108 | -4.39793 | 1.09E-05 | 0.000333 | yes |
| DLC1      | 8:12940871-13372429    | 7.89025 | 10.13   | 0.778899 | -0.36049 | -3.48722 | 0.000488 | 0.008779 | yes |
| MYO10     | 5:16662015-16936385    | 9.31505 | 11.9525 | 0.779339 | -0.35968 | -4.89356 | 9.90E-07 | 3.81E-05 | yes |
| UAP1      | 1:162531295-162569633  | 23.8927 | 30.6577 | 0.779338 | -0.35968 | -5.02506 | 5.03E-07 | 2.05E-05 | yes |
| RPL39L    | 3:186838740-186857263  | 40.8228 | 52.3384 | 0.779978 | -0.35849 | -4.62307 | 3.78E-06 | 0.000126 | yes |
| PRKAB2    | 1:146626684-146644129  | 3.1892  | 4.08845 | 0.780051 | -0.35836 | -4.37922 | 1.19E-05 | 0.00036  | yes |
| CD2AP     | 6:47445524-47594999    | 4.64713 | 5.95736 | 0.780065 | -0.35833 | -4.78397 | 1.72E-06 | 6.19E-05 | yes |
| C18orf10  | 18:34376033-34805288   | 7.80032 | 9.98608 | 0.781119 | -0.35639 | -4.13726 | 3.51E-05 | 0.000945 | yes |
| TPT1      | 13:45911000-45965618   | 677.672 | 867.042 | 0.781591 | -0.35551 | -3.66286 | 0.000249 | 0.005033 | yes |
| SLC25A4   | 4:186064416-186071538  | 3.99791 | 5.11137 | 0.78216  | -0.35446 | -4.34518 | 1.39E-05 | 0.000413 | yes |
| GPAM      | 10:113909621-113943525 | 2.96509 | 3.79044 | 0.782255 | -0.35429 | -4.4299  | 9.43E-06 | 0.000293 | yes |
| CCNG2     | 4:78078356-78091213    | 4.204   | 5.36903 | 0.783009 | -0.3529  | -4.63216 | 3.62E-06 | 0.000122 | yes |
| KIAA1191  | 5:175773064-175788809  | 22.945  | 29.2894 | 0.783389 | -0.3522  | -3.57526 | 0.00035  | 0.006704 | yes |
| MYH11     | 16:15737123-15950887   | 21.7362 | 27.6784 | 0.785313 | -0.34866 | -4.55064 | 5.35E-06 | 0.000174 | yes |
| RPS8      | 1:45241245-45244412    | 215.658 | 274.545 | 0.785511 | -0.3483  | -4.72015 | 2.36E-06 | 8.28E-05 | yes |
| LMAN1     | 18:56995054-57026508   | 37.279  | 47.3272 | 0.787687 | -0.34431 | -4.48013 | 7.46E-06 | 0.000238 | yes |
| CEBPD     | 8:48649475-48650726    | 15.3625 | 19.4888 | 0.788273 | -0.34323 | -4.14473 | 3.40E-05 | 0.000921 | yes |
| FSTL3     | 19:676388-683392       | 20.6121 | 26.1444 | 0.788394 | -0.34301 | -4.79192 | 1.65E-06 | 5.98E-05 | yes |
| FLNC      | 7:128470482-128499328  | 27.8336 | 35.2813 | 0.788905 | -0.34208 | -4.27874 | 1.88E-05 | 0.000539 | yes |
| LOC391722 | 4:185220281-185238554  | 199.804 | 253.139 | 0.789305 | -0.34134 | -4.40326 | 1.07E-05 | 0.000326 | yes |
| SLC16A1   | 1:113454468-113498975  | 19.8607 | 25.1344 | 0.79018  | -0.33975 | -4.47636 | 7.59E-06 | 0.000241 | yes |



|         |                        |         |         |          |          |          |          |          |     |
|---------|------------------------|---------|---------|----------|----------|----------|----------|----------|-----|
| MYADML  | 2:33951127-33953284    | 28.8406 | 36.4898 | 0.790374 | -0.33939 | -4.73593 | 2.18E-06 | 7.68E-05 | yes |
| MYH9    | 22:36677322-36784063   | 80.761  | 102.149 | 0.79062  | -0.33894 | -3.63878 | 0.000274 | 0.005463 | yes |
| GLS     | 2:191745546-191829776  | 6.9186  | 8.75069 | 0.790635 | -0.33892 | -4.62814 | 3.69E-06 | 0.000124 | yes |
| WNK4    | 17:40932648-40949084   | 3.50668 | 4.43329 | 0.790988 | -0.33827 | -3.90847 | 9.29E-05 | 0.002183 | yes |
| ALDH1L2 | 12:105413561-105478341 | 10.2204 | 12.9122 | 0.79153  | -0.33728 | -4.67032 | 3.01E-06 | 0.000103 | yes |
| DSP     | 6:7540683-7586946      | 2.19096 | 2.76712 | 0.791784 | -0.33682 | -4.04663 | 5.20E-05 | 0.001327 | yes |
| SEC61G  | 7:54819939-54826939    | 128.471 | 162.239 | 0.791863 | -0.33668 | -4.6646  | 3.09E-06 | 0.000105 | yes |
| RARRES2 | 7:150035406-150038763  | 75.2888 | 95.0285 | 0.792276 | -0.33592 | -4.66404 | 3.10E-06 | 0.000105 | yes |
| UGP2    | 2:64068097-64118696    | 22.5203 | 28.4205 | 0.792396 | -0.33571 | -4.41635 | 1.00E-05 | 0.000311 | yes |
| PPP2R5B | 11:64692142-64703360   | 4.16737 | 5.2591  | 0.792411 | -0.33568 | -3.50976 | 0.000449 | 0.008159 | yes |
| PALLD   | 4:169418216-169849608  | 22.4636 | 28.348  | 0.792423 | -0.33566 | -3.90211 | 9.54E-05 | 0.002234 | yes |
| PLEKHA2 | 8:38758752-38831431    | 2.66555 | 3.35867 | 0.793633 | -0.33346 | -3.89933 | 9.65E-05 | 0.002249 | yes |
| AK2     | 1:33473540-33502512    | 11.1194 | 14.0102 | 0.793665 | -0.3334  | -4.1875  | 2.82E-05 | 0.000779 | yes |
| IFRD1   | 7:112063198-112117258  | 5.03023 | 6.32838 | 0.794869 | -0.33121 | -3.68409 | 0.00023  | 0.004724 | yes |
| PTGS2   | 1:186640943-186649559  | 37.0875 | 46.6396 | 0.795193 | -0.33062 | -4.3189  | 1.57E-05 | 0.000457 | yes |
| EIF2S2  | 20:32676114-32700085   | 20.5928 | 25.8904 | 0.795384 | -0.33028 | -4.61668 | 3.90E-06 | 0.000129 | yes |
| LOXL2   | 8:23154409-23261722    | 97.6083 | 122.715 | 0.795406 | -0.33024 | -3.87321 | 0.000107 | 0.002456 | yes |
| GLIPR1  | 12:75874512-75905418   | 21.7385 | 27.326  | 0.795524 | -0.33002 | -4.16209 | 3.15E-05 | 0.000859 | yes |
| FAM69A  | 1:93307720-93427079    | 4.71118 | 5.91977 | 0.795838 | -0.32945 | -3.5493  | 0.000386 | 0.007237 | yes |
| MYH14   | 19:50706884-50813801   | 11.778  | 14.7885 | 0.79643  | -0.32838 | -4.54117 | 5.59E-06 | 0.000181 | yes |
| RDH10   | 8:74207264-74237516    | 3.25137 | 4.08202 | 0.79651  | -0.32824 | -3.48457 | 0.000493 | 0.008856 | yes |
| LRRFIP1 | 2:238536223-238690290  | 15.8295 | 19.8679 | 0.796737 | -0.32782 | -3.58561 | 0.000336 | 0.006478 | yes |
| DACT1   | 14:59104756-59115039   | 25.8789 | 32.4573 | 0.797321 | -0.32677 | -3.44576 | 0.000569 | 0.009969 | yes |
| OSMR    | 5:38845959-38935743    | 22.0667 | 27.646  | 0.798188 | -0.3252  | -4.09749 | 4.18E-05 | 0.001096 | yes |
| HSPB1   | 7:75931874-75933614    | 74.9859 | 93.8373 | 0.799105 | -0.32354 | -4.52003 | 6.18E-06 | 0.000198 | yes |
| RPS27A  | 2:55399682-55462989    | 125.882 | 157.417 | 0.799672 | -0.32252 | -4.36119 | 1.29E-05 | 0.000386 | yes |
| IER3    | 6:30710975-30712327    | 168.786 | 210.826 | 0.800594 | -0.32086 | -4.1642  | 3.12E-05 | 0.000853 | yes |
| RNF187  | 1:228675067-228683889  | 15.019  | 18.7379 | 0.801531 | -0.31917 | -4.46138 | 8.14E-06 | 0.000258 | yes |
| CHSY1   | 15:101715927-101792137 | 9.47247 | 11.8147 | 0.801753 | -0.31877 | -4.44725 | 8.70E-06 | 0.000274 | yes |
| TOMM7   | 7:22852250-22862421    | 34.2586 | 42.6866 | 0.802561 | -0.31732 | -3.95386 | 7.69E-05 | 0.001853 | yes |
| RPL21   | 13:27825691-27830705   | 144.857 | 180.483 | 0.802607 | -0.31723 | -4.42899 | 9.47E-06 | 0.000294 | yes |
| AMOTL2  | 3:134074189-134093406  | 8.33255 | 10.3756 | 0.803091 | -0.31636 | -4.41437 | 1.01E-05 | 0.000313 | yes |
| EFEMP1  | 2:56093096-56151298    | 138.487 | 172.308 | 0.803718 | -0.31524 | -3.63536 | 0.000278 | 0.005517 | yes |
| ZNF470  | 19:57078889-57094262   | 2.11272 | 2.62693 | 0.804254 | -0.31428 | -3.6819  | 0.000232 | 0.004751 | yes |

|          |                        |         |         |          |          |          |          |          |     |
|----------|------------------------|---------|---------|----------|----------|----------|----------|----------|-----|
| SYNE1    | 6:152442818-152958534  | 2.1712  | 2.69842 | 0.804619 | -0.31362 | -4.36094 | 1.30E-05 | 0.000386 | yes |
| CLIC4    | 1:25071759-25170815    | 84.388  | 104.704 | 0.805967 | -0.31121 | -3.6609  | 0.000251 | 0.005065 | yes |
| NPTN     | 15:73735498-73925753   | 31.0895 | 38.5592 | 0.80628  | -0.31065 | -4.3293  | 1.50E-05 | 0.000441 | yes |
| RPLP0    | 12:120634502-120639014 | 193.405 | 239.72  | 0.806795 | -0.30973 | -3.63651 | 0.000276 | 0.0055   | yes |
| GAS6     | 13:114523521-114567046 | 56.9231 | 70.5533 | 0.80681  | -0.3097  | -3.90023 | 9.61E-05 | 0.002244 | yes |
| RPL7     | 8:74202873-74205869    | 175.601 | 217.566 | 0.807116 | -0.30915 | -4.18721 | 2.82E-05 | 0.000779 | yes |
| ATP2A1   | 16:28889808-28936532   | 4.37921 | 5.42541 | 0.807167 | -0.30906 | -3.47349 | 0.000514 | 0.009178 | yes |
| ZRANB1   | 10:126630691-126676005 | 4.65613 | 5.76597 | 0.807519 | -0.30843 | -4.03298 | 5.51E-05 | 0.00139  | yes |
| MAP1LC3B | 16:87425800-87438380   | 38.8774 | 48.1401 | 0.807589 | -0.30831 | -4.25346 | 2.10E-05 | 0.0006   | yes |
| KLF9     | 9:72999512-73029573    | 3.21732 | 3.98219 | 0.807927 | -0.3077  | -3.70761 | 0.000209 | 0.004375 | yes |
| WDR45L   | 17:80572437-80606411   | 13.1312 | 16.248  | 0.808173 | -0.30726 | -4.23024 | 2.33E-05 | 0.000659 | yes |
| EIF3L    | 22:38245378-38284789   | 23.8815 | 29.5486 | 0.808211 | -0.3072  | -4.29479 | 1.75E-05 | 0.000503 | yes |
| FIBIN    | 11:27015627-27018634   | 7.87506 | 9.74332 | 0.808252 | -0.30712 | -4.01297 | 6.00E-05 | 0.001502 | yes |
| RPS23    | 5:81569138-81574235    | 32.1344 | 39.7497 | 0.808419 | -0.30683 | -4.18814 | 2.81E-05 | 0.000779 | yes |
| SLC16A3  | 17:80186281-80197375   | 64.2668 | 79.4474 | 0.808923 | -0.30593 | -4.1516  | 3.30E-05 | 0.000896 | yes |
| C7orf60  | 7:112459201-112579932  | 5.72388 | 7.06803 | 0.809827 | -0.30431 | -3.9531  | 7.71E-05 | 0.001856 | yes |
| RPL21P28 | 1:212113740-212278187  | 312.177 | 385.284 | 0.810252 | -0.30356 | -3.98101 | 6.86E-05 | 0.001687 | yes |
| PFKP     | 10:3109711-3178997     | 37.9049 | 46.7812 | 0.810259 | -0.30354 | -4.13321 | 3.58E-05 | 0.000958 | yes |
| GFPT1    | 2:69546904-69614382    | 8.73715 | 10.7777 | 0.810669 | -0.30281 | -4.19655 | 2.71E-05 | 0.000755 | yes |
| ISG15    | 1:948846-949920        | 149.468 | 184.28  | 0.811092 | -0.30206 | -4.18941 | 2.80E-05 | 0.000778 | yes |
| RPLPOP2  | 11:61382507-61406921   | 74.6682 | 92.043  | 0.811232 | -0.30181 | -3.7565  | 0.000172 | 0.003705 | yes |
| XBP1     | 22:29190547-29196560   | 25.9938 | 32.0378 | 0.811348 | -0.30161 | -4.21145 | 2.54E-05 | 0.000711 | yes |
| TMSB10   | 2:85132762-85133799    | 994.528 | 1225.7  | 0.811396 | -0.30152 | -3.6892  | 0.000225 | 0.00465  | yes |
| RPS15A   | 16:18794276-18801656   | 198.354 | 244.446 | 0.811443 | -0.30144 | -3.96127 | 7.46E-05 | 0.001805 | yes |
| NEK7     | 1:198126107-198291550  | 31.9787 | 39.3873 | 0.811904 | -0.30062 | -4.03765 | 5.40E-05 | 0.00137  | yes |
| RPL9     | 4:39455743-39460568    | 153.982 | 189.624 | 0.812039 | -0.30038 | -3.97871 | 6.93E-05 | 0.001701 | yes |
| SARS     | 1:109756514-109780804  | 25.2561 | 31.0983 | 0.812138 | -0.3002  | -3.81439 | 0.000137 | 0.003031 | yes |
| COX7C    | 5:85913783-85916583    | 120.502 | 148.281 | 0.81266  | -0.29928 | -3.9979  | 6.39E-05 | 0.00159  | yes |
| PTPRF    | 1:43996546-44089343    | 12.6942 | 15.6072 | 0.813355 | -0.29804 | -4.0817  | 4.47E-05 | 0.001163 | yes |
| PNRC1    | 6:89790428-89794879    | 10.5338 | 12.9503 | 0.813402 | -0.29796 | -3.82134 | 0.000133 | 0.002969 | yes |
| SERTAD2  | 2:64858754-64881046    | 5.73076 | 7.04017 | 0.814009 | -0.29688 | -4.07484 | 4.60E-05 | 0.001193 | yes |
| FOXN3    | 14:89622515-90085494   | 3.79509 | 4.66177 | 0.814088 | -0.29674 | -3.47051 | 0.000519 | 0.009246 | yes |
| TBL2     | 7:72983273-72993013    | 5.74949 | 7.06032 | 0.814338 | -0.2963  | -3.58121 | 0.000342 | 0.00657  | yes |
| HINT1    | 5:130494874-130501034  | 49.7761 | 61.0991 | 0.814678 | -0.2957  | -3.74474 | 0.000181 | 0.003833 | yes |

|              |                        |         |         |          |          |          |          |          |     |
|--------------|------------------------|---------|---------|----------|----------|----------|----------|----------|-----|
| TRAM1L1      | 4:118004709-118006736  | 30.4018 | 37.3129 | 0.81478  | -0.29552 | -4.12609 | 3.69E-05 | 0.000984 | yes |
| RPS3A        | 4:152020753-152025804  | 152.811 | 187.252 | 0.816071 | -0.29323 | -3.97486 | 7.04E-05 | 0.00172  | yes |
| MYH7         | 14:23881946-23903496   | 2.58266 | 3.1636  | 0.816367 | -0.29271 | -3.44849 | 0.000564 | 0.009905 | yes |
| TRAM1        | 8:71485452-71520694    | 51.8694 | 63.5356 | 0.816383 | -0.29268 | -3.86925 | 0.000109 | 0.002493 | yes |
| PTRF         | 17:40554466-40575338   | 82.7658 | 101.325 | 0.816835 | -0.29188 | -3.56641 | 0.000362 | 0.006834 | yes |
| LOC100652914 | 12:93397533-93771512   | 1048.45 | 1283.43 | 0.816912 | -0.29175 | -3.7016  | 0.000214 | 0.004461 | yes |
| RAB3B        | 1:52373627-52456436    | 3.9699  | 4.85716 | 0.817329 | -0.29101 | -4.06798 | 4.74E-05 | 0.001225 | yes |
| TMEM2        | 9:74298281-74383800    | 8.95897 | 10.9605 | 0.817387 | -0.29091 | -4.06003 | 4.91E-05 | 0.00126  | yes |
| PACSIN2      | 22:43265771-43411184   | 7.39069 | 9.03392 | 0.818104 | -0.28964 | -3.67298 | 0.00024  | 0.004879 | yes |
| LOC400590    | 17:29332139-29361715   | 799.506 | 976.836 | 0.818465 | -0.28901 | -3.57002 | 0.000357 | 0.006785 | yes |
| RPL13AP3     | 14:56232962-56234435   | 84.9582 | 103.801 | 0.818472 | -0.289   | -3.9261  | 8.63E-05 | 0.002049 | yes |
| CALM2        | 2:47387220-47403740    | 132.885 | 162.35  | 0.818509 | -0.28893 | -3.82925 | 0.000129 | 0.002885 | yes |
| SLC7A2       | 8:17354596-17428077    | 3.94012 | 4.8114  | 0.818913 | -0.28822 | -3.62812 | 0.000285 | 0.005642 | yes |
| RPS5         | 19:58898635-58906171   | 97.5307 | 119.083 | 0.819014 | -0.28804 | -4.0233  | 5.74E-05 | 0.001441 | yes |
| RPL26        | 17:8280833-8286565     | 229.987 | 280.761 | 0.819156 | -0.28779 | -3.95672 | 7.60E-05 | 0.001837 | yes |
| LOC100652998 | 7:137074384-137531609  | 1032.7  | 1260.58 | 0.819226 | -0.28767 | -3.56628 | 0.000362 | 0.006834 | yes |
| VDAC2        | 10:76969911-76991206   | 29.5868 | 36.0931 | 0.819736 | -0.28677 | -3.52091 | 0.00043  | 0.007873 | yes |
| RPS6         | 9:19376253-19380235    | 247.946 | 302.439 | 0.819822 | -0.28662 | -3.7761  | 0.000159 | 0.003472 | yes |
| RPS12        | 6:133135707-133138703  | 185.78  | 226.546 | 0.820054 | -0.28621 | -3.98702 | 6.69E-05 | 0.001654 | yes |
| SLC35E1      | 19:16660647-16683193   | 7.95875 | 9.6979  | 0.820667 | -0.28513 | -3.9748  | 7.04E-05 | 0.00172  | yes |
| FKBP8        | 19:18642567-18654383   | 25      | 30.4625 | 0.820681 | -0.28511 | -3.97106 | 7.16E-05 | 0.001744 | yes |
| RPL13A       | 19:49990864-49995565   | 151.797 | 184.955 | 0.820724 | -0.28503 | -3.78687 | 0.000153 | 0.003356 | yes |
| WDR1         | 4:10075962-10118573    | 54.3199 | 66.178  | 0.820815 | -0.28487 | -3.74467 | 0.000181 | 0.003833 | yes |
| SLC25A6      | Y:1455044-1461039      | 44.7368 | 54.4796 | 0.821166 | -0.28425 | -3.5155  | 0.000439 | 0.008025 | yes |
| DNAJB4       | 1:78470635-78482998    | 13.4347 | 16.356  | 0.821393 | -0.28386 | -3.84817 | 0.000119 | 0.002696 | yes |
| LOC653075    | 15:30427989-30439395   | 5.18266 | 6.30821 | 0.821574 | -0.28354 | -3.45989 | 0.00054  | 0.009577 | yes |
| RAP2A        | 13:98086474-98120252   | 4.04283 | 4.91931 | 0.821829 | -0.28309 | -3.44709 | 0.000567 | 0.009945 | yes |
| NUCB2        | 11:17298285-17353070   | 29.6461 | 36.0633 | 0.822057 | -0.28269 | -3.94713 | 7.91E-05 | 0.001895 | yes |
| RPL38        | 17:72199794-72206019   | 167.389 | 203.468 | 0.82268  | -0.2816  | -3.49439 | 0.000475 | 0.008589 | yes |
| RPL3         | 22:39708886-39715670   | 182.881 | 222.231 | 0.822932 | -0.28115 | -3.6001  | 0.000318 | 0.006177 | yes |
| ICAM1        | 19:10381516-10397291   | 21.146  | 25.6945 | 0.822978 | -0.28107 | -3.9093  | 9.26E-05 | 0.002179 | yes |
| GLTP         | 12:110288747-110318293 | 8.98278 | 10.9049 | 0.823738 | -0.27974 | -3.53937 | 0.000401 | 0.007466 | yes |
| GALNT10      | 5:153570294-153825382  | 9.26429 | 11.2338 | 0.82468  | -0.27809 | -3.83455 | 0.000126 | 0.002828 | yes |
| IKBIP        | 12:99007181-99038589   | 30.3834 | 36.8388 | 0.824766 | -0.27794 | -3.70235 | 0.000214 | 0.004454 | yes |

|              |                        |         |         |          |          |          |          |          |     |
|--------------|------------------------|---------|---------|----------|----------|----------|----------|----------|-----|
| TNFAIP2      | 14:103592663-103603776 | 5.79093 | 7.02022 | 0.824893 | -0.27772 | -3.64842 | 0.000264 | 0.005287 | yes |
| C7orf74      | 7:106297210-106301634  | 5.58365 | 6.76744 | 0.825076 | -0.2774  | -3.66757 | 0.000245 | 0.004961 | yes |
| HMOX1        | 22:35777059-35790207   | 79.5338 | 96.347  | 0.825493 | -0.27667 | -3.74033 | 0.000184 | 0.003888 | yes |
| LOC100652902 | 20:21735848-21736174   | 1594.15 | 1930.6  | 0.825728 | -0.27626 | -3.53635 | 0.000406 | 0.007532 | yes |
| OST4         | 2:27274490-27294567    | 135.775 | 164.166 | 0.827059 | -0.27394 | -3.59611 | 0.000323 | 0.006255 | yes |
| RPL23P8      | 7:20866916-20867439    | 384.509 | 464.782 | 0.827289 | -0.27354 | -3.67799 | 0.000235 | 0.004804 | yes |
| ARPC2        | 2:219081873-219119071  | 94.8255 | 114.614 | 0.827347 | -0.27344 | -3.65149 | 0.000261 | 0.005232 | yes |
| PCYOX1       | 2:70485230-70508317    | 9.0546  | 10.9377 | 0.827834 | -0.27259 | -3.8123  | 0.000138 | 0.003047 | yes |
| RPS29        | 14:50044038-50053094   | 302.526 | 365.248 | 0.828276 | -0.27182 | -3.48294 | 0.000496 | 0.008887 | yes |
| CITED2       | 6:139693395-139695785  | 19.6832 | 23.7558 | 0.828564 | -0.27132 | -3.44972 | 0.000561 | 0.009884 | yes |
| RPL31P11     | 1:161653484-161655042  | 57.9736 | 69.9551 | 0.828726 | -0.27103 | -3.74469 | 0.000181 | 0.003833 | yes |
| EIF1         | 17:39845126-39847898   | 100.513 | 121.252 | 0.82896  | -0.27063 | -3.6669  | 0.000246 | 0.004961 | yes |
| CNOT8        | 5:154238197-154256352  | 11.3161 | 13.6381 | 0.829742 | -0.26927 | -3.61799 | 0.000297 | 0.00584  | yes |
| DHX40        | 17:57642885-57685713   | 6.08992 | 7.3383  | 0.829882 | -0.26902 | -3.47035 | 0.00052  | 0.009246 | yes |
| RPS17        | 15:82821160-82824865   | 284.589 | 342.826 | 0.830127 | -0.2686  | -3.70891 | 0.000208 | 0.004359 | yes |
| RPS17L       | 15:83205503-83209208   | 284.239 | 342.199 | 0.830625 | -0.26773 | -3.69703 | 0.000218 | 0.004527 | yes |
| UBE2J1       | 6:90036343-90062619    | 7.89108 | 9.49676 | 0.830923 | -0.26721 | -3.6879  | 0.000226 | 0.004661 | yes |
| HIVEP2       | 6:143072603-143266338  | 6.03976 | 7.26765 | 0.831047 | -0.267   | -3.72621 | 0.000194 | 0.004096 | yes |
| RPL29P2      | 17:7623038-7737058     | 86.7852 | 104.387 | 0.831379 | -0.26642 | -3.67138 | 0.000241 | 0.004902 | yes |
| MAP1LC3B2    | 12:116997185-117014425 | 57.9099 | 69.6388 | 0.831575 | -0.26608 | -3.69642 | 0.000219 | 0.004527 | yes |
| SVEP1        | 9:113127527-113342160  | 5.41851 | 6.50278 | 0.833261 | -0.26316 | -3.65776 | 0.000254 | 0.005113 | yes |
| HSPA13       | 21:15743435-15755509   | 13.2589 | 15.9098 | 0.833379 | -0.26295 | -3.67641 | 0.000237 | 0.00482  | yes |
| PPIAL4B      | 1:144363461-144364246  | 57.0811 | 68.4821 | 0.833519 | -0.26271 | -3.62867 | 0.000285 | 0.005638 | yes |
| RPL18A       | 19:17970730-17974124   | 191.655 | 229.878 | 0.833725 | -0.26236 | -3.62366 | 0.00029  | 0.005727 | yes |
| RPS14        | 5:149823791-149829319  | 215.93  | 258.915 | 0.83398  | -0.26191 | -3.56249 | 0.000367 | 0.006901 | yes |
| RPL23        | 17:37006320-37010053   | 268.432 | 321.715 | 0.834378 | -0.26123 | -3.56395 | 0.000365 | 0.006871 | yes |
| DRAM1        | 12:102271104-102317401 | 37.1749 | 44.5512 | 0.834431 | -0.26114 | -3.51351 | 0.000442 | 0.008075 | yes |
| PPAP2A       | 5:54603575-54830873    | 12.004  | 14.3826 | 0.83462  | -0.26081 | -3.60591 | 0.000311 | 0.006065 | yes |
| RPL8         | 8:146015153-146017805  | 195.785 | 234.32  | 0.835545 | -0.25921 | -3.44578 | 0.000569 | 0.009969 | yes |
| ACTR3        | 2:114588759-114716167  | 39.082  | 46.6986 | 0.836899 | -0.25688 | -3.51058 | 0.000447 | 0.008144 | yes |
| RPS27        | 1:153963238-153964631  | 339.288 | 405.293 | 0.837143 | -0.25645 | -3.5822  | 0.000341 | 0.006554 | yes |
| TEAD1        | 11:12695968-12966284   | 7.05372 | 8.42523 | 0.837214 | -0.25633 | -3.56608 | 0.000362 | 0.006834 | yes |
| RPS16        | 19:39923846-39926618   | 146.61  | 175.062 | 0.837475 | -0.25588 | -3.56699 | 0.000361 | 0.006834 | yes |
| RPL12        | 9:130209952-130213711  | 80.9397 | 96.5647 | 0.838191 | -0.25465 | -3.53368 | 0.00041  | 0.00759  | yes |

|         |                       |         |         |          |          |          |          |          |     |
|---------|-----------------------|---------|---------|----------|----------|----------|----------|----------|-----|
| SLC31A1 | 9:115983807-116026772 | 6.98466 | 8.3279  | 0.838706 | -0.25376 | -3.49206 | 0.000479 | 0.008643 | yes |
| EGLN1   | 1:231499496-231560790 | 6.46792 | 7.71144 | 0.838743 | -0.2537  | -3.54488 | 0.000393 | 0.00734  | yes |

### Up-regulated genes (those highlighted in red are associated with cell migration)

| Gene Symbol    | Chr Coordinates        | Avg FPKM-SI | Avg FRKM-CI | Ratio    | log2 fold | test_stat  | p_value  | q_value  | Sig? |
|----------------|------------------------|-------------|-------------|----------|-----------|------------|----------|----------|------|
| C10orf32-AS3MT | 10:104613966-104661656 | 0.396633    | 0.06297     | 6.298761 | 2.655068  | -1.79769e- | 6.03E-09 | 3.71E-07 | yes  |
| CCDC102B       | 18:66382490-66722426   | 0.502518    | 0.130317    | 3.85612  | 1.94715   | 3.76098    | 0.000169 | 0.003654 | yes  |
| FAIM2          | 12:50260678-50297760   | 0.71242     | 0.190738    | 3.735071 | 1.901136  | 7.15878    | 8.14E-13 | 1.04E-10 | yes  |
| COLEC12        | 18:319354-500729       | 1.09535     | 0.3697      | 2.962808 | 1.566965  | 6.42172    | 1.35E-10 | 1.15E-08 | yes  |
| THBD           | 20:23026269-23030301   | 1.93042     | 0.698657    | 2.763044 | 1.466259  | 9.35384    | 0        | 0        | yes  |
| OLFML2B        | 1:161952981-161993644  | 0.505418    | 0.203372    | 2.48519  | 1.313356  | 3.91366    | 9.09E-05 | 0.002147 | yes  |
| <b>KDR</b>     | 4:55944425-55991762    | 0.764623    | 0.311649    | 2.453475 | 1.294827  | 6.70552    | 2.01E-11 | 2.00E-09 | yes  |
| VAT1L          | 16:77822482-78014001   | 1.78394     | 0.740952    | 2.407632 | 1.267615  | 7.87685    | 3.33E-15 | 6.07E-13 | yes  |
| C4B            | 6:31982571-32003195    | 0.422388    | 0.190638    | 2.215655 | 1.147733  | 4.32409    | 1.53E-05 | 0.000449 | yes  |
| <b>ANK3</b>    | 10:61786055-62493284   | 0.254212    | 0.115109    | 2.208446 | 1.143031  | 4.23612    | 2.27E-05 | 0.000644 | yes  |
| HECW2          | 2:197063976-197457335  | 5.89637     | 2.7008      | 2.183194 | 1.12644   | 14.3688    | 0        | 0        | yes  |
| C4A            | 6:31949833-31970457    | 0.419527    | 0.19364     | 2.166531 | 1.115387  | 4.2196     | 2.45E-05 | 0.000687 | yes  |
| COL22A1        | 8:139600477-139926236  | 0.659831    | 0.305568    | 2.159359 | 1.110603  | 5.72066    | 1.06E-08 | 6.14E-07 | yes  |
| <b>AIM1</b>    | 6:106959729-107018335  | 0.358271    | 0.168813    | 2.122295 | 1.085625  | 4.53353    | 5.80E-06 | 0.000187 | yes  |
| SYT14L         | 4:68918915-68995587    | 0.715295    | 0.350409    | 2.041315 | 1.029499  | 3.52487    | 0.000424 | 0.007796 | yes  |
| FER1L6         | 8:124953960-125132302  | 0.845457    | 0.422283    | 2.00211  | 1.001521  | 5.74983    | 8.93E-09 | 5.31E-07 | yes  |
| RAB27B         | 18:52495707-52562747   | 2.38977     | 1.20421     | 1.984513 | 0.988785  | 10.1118    | 0        | 0        | yes  |
| ASF1B          | 19:14230320-14247440   | 1.21721     | 0.620799    | 1.960715 | 0.97138   | 3.50169    | 0.000462 | 0.008389 | yes  |
| MID1           | X:10413349-10851809    | 1.11223     | 0.56732     | 1.960498 | 0.971221  | 4.09503    | 4.22E-05 | 0.001104 | yes  |
| SYT14          | 1:210111537-210337636  | 0.640449    | 0.327976    | 1.952731 | 0.965493  | 3.97632    | 7.00E-05 | 0.001715 | yes  |
| KIFC1          | 6:33359312-33377701    | 0.802355    | 0.414097    | 1.937602 | 0.954272  | 3.58759    | 0.000334 | 0.006437 | yes  |
| <b>SEMA3A</b>  | 7:83587658-83824217    | 1.57747     | 0.817408    | 1.929844 | 0.948484  | 7.36954    | 1.71E-13 | 2.39E-11 | yes  |
| F2RL1          | 5:76114832-76131140    | 4.14153     | 2.1638      | 1.914008 | 0.936597  | 8.18572    | 2.22E-16 | 4.64E-14 | yes  |
| FRMD5          | 15:44165729-44487429   | 1.0916      | 0.585335    | 1.864915 | 0.89911   | 3.60217    | 0.000316 | 0.006136 | yes  |
| COL13A1        | 10:71561643-71718904   | 4.01725     | 2.16221     | 1.857937 | 0.893702  | 5.74318    | 9.29E-09 | 5.49E-07 | yes  |
| C6orf105       | 6:11713887-11779280    | 2.68042     | 1.44386     | 1.856427 | 0.892528  | 5.02237    | 5.10E-07 | 2.08E-05 | yes  |
| FOXRED2        | 22:36883232-36903148   | 1.2762      | 0.691523    | 1.845492 | 0.884005  | 3.52757    | 0.000419 | 0.007737 | yes  |
| TJP2           | 9:71736223-71870124    | 1.20231     | 0.657339    | 1.829056 | 0.871099  | 3.89299    | 9.90E-05 | 0.002297 | yes  |
| EFNA5          | 5:106712589-107006596  | 0.758232    | 0.41549     | 1.82491  | 0.867826  | 4.62443    | 3.76E-06 | 0.000126 | yes  |

|           |                        |          |          |          |          |         |          |          |     |
|-----------|------------------------|----------|----------|----------|----------|---------|----------|----------|-----|
| MDK       | 11:46402617-46405375   | 23.6992  | 13.0124  | 1.821278 | 0.864951 | 7.70934 | 1.27E-14 | 2.15E-12 | yes |
| PPAP2B    | 1:56960418-57045257    | 10.3843  | 5.72659  | 1.813348 | 0.858656 | 10.9651 | 0        | 0        | yes |
| LOC154822 | 7:158801044-158818929  | 0.822098 | 0.45516  | 1.806174 | 0.852937 | 4.0957  | 4.21E-05 | 0.001103 | yes |
| ALDH1A3   | 15:101420008-101610317 | 16.5924  | 9.19227  | 1.805038 | 0.85203  | 10.5189 | 0        | 0        | yes |
| DIO2      | 14:80663867-80921810   | 1.11387  | 0.619964 | 1.796669 | 0.845325 | 5.81927 | 5.91E-09 | 3.65E-07 | yes |
| CALCRL    | 2:188207845-188313021  | 0.496976 | 0.277136 | 1.793257 | 0.842582 | 3.53732 | 0.000404 | 0.007515 | yes |
| PLAU      | 10:75669726-75682535   | 2.84444  | 1.58908  | 1.789992 | 0.839953 | 5.36797 | 7.96E-08 | 3.70E-06 | yes |
| DUSP10    | 1:221874763-221915516  | 3.34895  | 1.87493  | 1.786173 | 0.836872 | 5.04441 | 4.55E-07 | 1.87E-05 | yes |
| PTN       | 7:136912087-137028546  | 6.42444  | 3.60595  | 1.781622 | 0.833191 | 5.9099  | 3.42E-09 | 2.22E-07 | yes |
| E2F7      | 12:77415025-77459360   | 2.19282  | 1.24021  | 1.768104 | 0.822203 | 7.66326 | 1.82E-14 | 3.02E-12 | yes |
| MCM5      | 22:35796115-35820495   | 1.48353  | 0.842836 | 1.760164 | 0.81571  | 4.16076 | 3.17E-05 | 0.000862 | yes |
| MSX1      | 4:4861391-4865663      | 1.90864  | 1.08963  | 1.75164  | 0.808707 | 4.03539 | 5.45E-05 | 0.001378 | yes |
| DOCK4     | 7:111366163-111846462  | 0.556459 | 0.318998 | 1.744397 | 0.802728 | 4.67971 | 2.87E-06 | 9.86E-05 | yes |
| AKR1C4    | 10:5238797-5260910     | 27.7957  | 15.9399  | 1.743781 | 0.802219 | 9.97906 | 0        | 0        | yes |
| AKR1C1    | 10:5005453-5020158     | 30.5206  | 17.7637  | 1.718144 | 0.780851 | 10.2397 | 0        | 0        | yes |
| HSD11B1   | 1:209859524-209908295  | 9.74382  | 5.69075  | 1.712221 | 0.775869 | 7.30581 | 2.76E-13 | 3.68E-11 | yes |
| SLC6A15   | 12:85253266-85306606   | 2.92193  | 1.70712  | 1.711614 | 0.775357 | 6.11961 | 9.38E-10 | 6.90E-08 | yes |
| AKR1C3    | 10:5136567-5149878     | 32.4446  | 18.9717  | 1.710158 | 0.774129 | 10.0245 | 0        | 0        | yes |
| PODXL     | 7:131185020-131241376  | 0.994479 | 0.582804 | 1.70637  | 0.77093  | 5.05233 | 4.36E-07 | 1.81E-05 | yes |
| AKR1C2    | 10:5031964-5060207     | 28.611   | 16.7682  | 1.706265 | 0.770842 | 9.64899 | 0        | 0        | yes |
| TAKR      | 10:4913858-4958465     | 2.22318  | 1.30417  | 1.70467  | 0.769493 | 3.46603 | 0.000528 | 0.009384 | yes |
| NPTXR     | 22:39214455-39240017   | 0.669527 | 0.393393 | 1.701929 | 0.767171 | 4.11065 | 3.95E-05 | 0.001043 | yes |
| ABCA9     | 17:66970772-67057136   | 3.50095  | 2.0574   | 1.701638 | 0.766924 | 8.97017 | 0        | 0        | yes |
| GEM       | 8:95261480-95274547    | 4.65609  | 2.7541   | 1.690603 | 0.757538 | 3.68342 | 0.00023  | 0.00473  | yes |
| PREX1     | 20:47240792-47444420   | 1.01226  | 0.600197 | 1.686546 | 0.754072 | 5.33281 | 9.67E-08 | 4.40E-06 | yes |
| FAM65C    | 20:49202644-49253426   | 0.739215 | 0.438899 | 1.684249 | 0.752105 | 3.57153 | 0.000355 | 0.006773 | yes |
| RRM2      | 2:10262694-10271546    | 3.02627  | 1.80452  | 1.67705  | 0.745926 | 5.78029 | 7.46E-09 | 4.51E-07 | yes |
| GRB14     | 2:165349322-165478360  | 1.53209  | 0.914768 | 1.67484  | 0.744023 | 3.78192 | 0.000156 | 0.003407 | yes |
| AKR1CL1   | 10:5196654-5227150     | 2.26676  | 1.3566   | 1.670913 | 0.740636 | 4.30137 | 1.70E-05 | 0.000491 | yes |
| MELK      | 9:36572904-36677679    | 1.44043  | 0.87027  | 1.655153 | 0.726965 | 3.63858 | 0.000274 | 0.005463 | yes |
| TNXB      | 6:32006092-32077151    | 0.291891 | 0.176461 | 1.654139 | 0.72608  | 3.45011 | 0.00056  | 0.009882 | yes |
| CLSPN     | 1:36197712-36235551    | 0.400198 | 0.242857 | 1.647875 | 0.720607 | 3.59111 | 0.000329 | 0.006368 | yes |
| STEAP3    | 2:119981383-120023228  | 3.584    | 2.19077  | 1.635954 | 0.710133 | 4.81348 | 1.48E-06 | 5.48E-05 | yes |
| TMEM119   | 12:108983621-108991894 | 4.03039  | 2.46684  | 1.633827 | 0.708255 | 6.22395 | 4.85E-10 | 3.78E-08 | yes |

|              |                        |          |          |          |          |         |          |          |     |
|--------------|------------------------|----------|----------|----------|----------|---------|----------|----------|-----|
| LRP4         | 11:46867961-46940173   | 0.704852 | 0.432339 | 1.630323 | 0.705157 | 4.64279 | 3.44E-06 | 0.000116 | yes |
| SHCBP1       | 16:46614465-46655311   | 1.29329  | 0.793813 | 1.629212 | 0.704175 | 3.9067  | 9.36E-05 | 0.002196 | yes |
| DCBLD2       | 3:98514813-98620533    | 43.3509  | 26.7977  | 1.61771  | 0.693953 | 8.86138 | 0        | 0        | yes |
| MMP16        | 8:89049459-89339717    | 4.33342  | 2.68206  | 1.615706 | 0.692165 | 8.65347 | 0        | 0        | yes |
| APCDD1L      | 20:57034425-57089949   | 2.24462  | 1.39306  | 1.611287 | 0.688214 | 4.94462 | 7.63E-07 | 3.02E-05 | yes |
| NAV2         | 11:19372270-20143147   | 3.10926  | 1.9427   | 1.600484 | 0.678508 | 5.70235 | 1.18E-08 | 6.73E-07 | yes |
| CDH6         | 5:31193761-31329253    | 1.43108  | 0.89755  | 1.594429 | 0.67304  | 6.42839 | 1.29E-10 | 1.11E-08 | yes |
| ITGA2        | 5:52285155-52390609    | 43.0837  | 27.06    | 1.592154 | 0.67098  | 8.2837  | 2.22E-16 | 4.64E-14 | yes |
| MCM3         | 6:52128811-52149582    | 3.30652  | 2.07677  | 1.592145 | 0.670972 | 5.82126 | 5.84E-09 | 3.63E-07 | yes |
| TMEM132B     | 12:125811161-126143589 | 5.63993  | 3.55953  | 1.584459 | 0.66399  | 8.93753 | 0        | 0        | yes |
| LOC643723    | 1:219254314-219347130  | 3.22156  | 2.04194  | 1.577696 | 0.657819 | 3.9911  | 6.58E-05 | 0.001631 | yes |
| SERPINB2     | 18:61554938-61571124   | 6.20319  | 3.94279  | 1.5733   | 0.653793 | 5.86546 | 4.48E-09 | 2.83E-07 | yes |
| AKAP1        | 17:55162552-55198710   | 1.01019  | 0.64255  | 1.572158 | 0.652746 | 3.60527 | 0.000312 | 0.006071 | yes |
| DSEL         | 18:65173818-65566856   | 9.57568  | 6.10176  | 1.569331 | 0.65015  | 8.96105 | 0        | 0        | yes |
| LOC100130009 | 2:74645221-74645569    | 92.5258  | 59.0825  | 1.566044 | 0.647125 | 6.5834  | 4.60E-11 | 4.19E-09 | yes |
| TNFRSF1B     | 1:12227059-12269277    | 1.36189  | 0.874141 | 1.557975 | 0.639672 | 3.93882 | 8.19E-05 | 0.001953 | yes |
| NCAPG        | 4:17812524-18023483    | 1.19116  | 0.764637 | 1.557811 | 0.63952  | 3.88682 | 0.000102 | 0.002345 | yes |
| C2orf81      | 2:74641302-74644844    | 6.32247  | 4.05999  | 1.557262 | 0.639012 | 6.33092 | 2.44E-10 | 1.96E-08 | yes |
| C12orf35     | 12:32112352-32146041   | 2.36312  | 1.51766  | 1.557081 | 0.638844 | 6.62466 | 3.48E-11 | 3.21E-09 | yes |
| EVC          | 4:5712923-5816031      | 32.0223  | 20.5835  | 1.555727 | 0.637589 | 8.34466 | 0        | 0        | yes |
| PLA2G4A      | 1:186798031-186958113  | 3.40606  | 2.19423  | 1.55228  | 0.634389 | 5.45832 | 4.81E-08 | 2.40E-06 | yes |
| BDKRB1       | 14:96722558-96731100   | 24.1233  | 15.5423  | 1.552106 | 0.634227 | 7.95661 | 1.78E-15 | 3.32E-13 | yes |
| SCG2         | 2:224461657-224467217  | 2.67058  | 1.75643  | 1.520459 | 0.604507 | 4.35086 | 1.36E-05 | 0.000403 | yes |
| SDC1         | 2:20400557-20427748    | 5.73657  | 3.7805   | 1.51741  | 0.601611 | 6.72421 | 1.77E-11 | 1.81E-09 | yes |
| DRP2         | X:100474932-100519485  | 1.49607  | 0.988982 | 1.512737 | 0.597162 | 3.81534 | 0.000136 | 0.003024 | yes |
| HMGA1        | 6:34204576-34214008    | 37.7608  | 25.0092  | 1.509876 | 0.59443  | 5.48735 | 4.08E-08 | 2.07E-06 | yes |
| CFB          | 6:31913720-31919861    | 17.1619  | 11.3757  | 1.508646 | 0.593254 | 8.03028 | 8.88E-16 | 1.73E-13 | yes |
| CHAF1A       | 19:4402659-4443394     | 1.34371  | 0.893419 | 1.504009 | 0.588813 | 3.47175 | 0.000517 | 0.00922  | yes |
| UHRF1        | 19:4909509-4962165     | 1.38534  | 0.921921 | 1.502667 | 0.587525 | 3.91518 | 9.03E-05 | 0.002137 | yes |
| ARL4C        | 2:235401684-235405693  | 2.96582  | 1.9744   | 1.502137 | 0.587017 | 5.55861 | 2.72E-08 | 1.42E-06 | yes |
| NAV3         | 12:78225068-78606790   | 2.79497  | 1.86879  | 1.495604 | 0.580728 | 7.33883 | 2.15E-13 | 2.93E-11 | yes |
| MCM2         | 3:127317252-127341279  | 1.36272  | 0.912179 | 1.493917 | 0.5791   | 3.49543 | 0.000473 | 0.008567 | yes |
| OAF          | 11:120081746-120100650 | 17.7937  | 11.9132  | 1.493612 | 0.578806 | 7.4852  | 7.15E-14 | 1.08E-11 | yes |
| TIMELESS     | 12:56810156-56843200   | 0.878326 | 0.58858  | 1.49228  | 0.577518 | 3.45893 | 0.000542 | 0.009599 | yes |

|          |                       |          |          |          |          |         |          |          |     |
|----------|-----------------------|----------|----------|----------|----------|---------|----------|----------|-----|
| LAMA5    | 20:60884120-60942368  | 0.952993 | 0.63885  | 1.491732 | 0.576988 | 5.34145 | 9.22E-08 | 4.21E-06 | yes |
| NES      | 1:156638554-156647189 | 3.27173  | 2.19478  | 1.490687 | 0.575977 | 6.49636 | 8.23E-11 | 7.32E-09 | yes |
| HMGA1P7  | 6:134435099-134438818 | 14.1505  | 9.49992  | 1.489539 | 0.574866 | 7.37479 | 1.65E-13 | 2.32E-11 | yes |
| ODZ4     | 11:78364327-79151695  | 0.833253 | 0.559504 | 1.489271 | 0.574606 | 5.37664 | 7.59E-08 | 3.57E-06 | yes |
| F2R      | 5:76011867-76031595   | 14.7738  | 9.94247  | 1.485929 | 0.571365 | 7.87228 | 3.55E-15 | 6.40E-13 | yes |
| CDC25B   | 20:3776400-3786762    | 3.27509  | 2.20756  | 1.483579 | 0.569082 | 3.78493 | 0.000154 | 0.003377 | yes |
| C6orf174 | 6:127759550-127840500 | 0.663155 | 0.447288 | 1.482613 | 0.568142 | 4.33798 | 1.44E-05 | 0.000425 | yes |
| GPR125   | 4:22388998-22517672   | 2.94599  | 1.98843  | 1.481566 | 0.567123 | 5.70225 | 1.18E-08 | 6.73E-07 | yes |
| KIF11    | 10:94352824-94415152  | 0.939755 | 0.63486  | 1.480255 | 0.565846 | 3.4925  | 0.000479 | 0.00864  | yes |
| RGMB     | 5:98104998-98132198   | 18.0053  | 12.1865  | 1.477479 | 0.563138 | 7.62034 | 2.53E-14 | 4.14E-12 | yes |
| CNIH3    | 1:224804178-224928249 | 5.80379  | 3.95259  | 1.468351 | 0.554197 | 5.53961 | 3.03E-08 | 1.57E-06 | yes |
| KITLG    | 12:88886569-88974250  | 2.47579  | 1.68822  | 1.466509 | 0.552386 | 3.78156 | 0.000156 | 0.003407 | yes |
| MCM4     | 8:48872762-48890720   | 3.33618  | 2.27779  | 1.464657 | 0.550562 | 4.62354 | 3.77E-06 | 0.000126 | yes |
| TMTC1    | 12:29653745-29937692  | 2.21551  | 1.51367  | 1.463668 | 0.549588 | 6.27988 | 3.39E-10 | 2.68E-08 | yes |
| LAMB3    | 1:209788214-209825820 | 2.4877   | 1.70424  | 1.459712 | 0.545684 | 4.81901 | 1.44E-06 | 5.37E-05 | yes |
| ANGPTL2  | 9:129677052-129985445 | 17.9466  | 12.3234  | 1.456303 | 0.54231  | 7.47669 | 7.62E-14 | 1.14E-11 | yes |
| FGF5     | 4:81187741-81212171   | 3.1439   | 2.16959  | 1.449076 | 0.535133 | 5.58374 | 2.35E-08 | 1.26E-06 | yes |
| TPX2     | 20:30326903-30389603  | 1.89584  | 1.3093   | 1.44798  | 0.534042 | 3.96954 | 7.20E-05 | 0.00175  | yes |
| CXCR4    | 2:136871918-136875725 | 3.96526  | 2.73851  | 1.447963 | 0.534024 | 3.57411 | 0.000351 | 0.006715 | yes |
| KCTD12   | 13:77454303-77460540  | 12.2348  | 8.45459  | 1.447119 | 0.533184 | 7.38484 | 1.53E-13 | 2.18E-11 | yes |
| HYAL2    | 3:50355220-50360281   | 5.19444  | 3.59377  | 1.445401 | 0.53147  | 4.18636 | 2.83E-05 | 0.000779 | yes |
| DUSP6    | 12:89741836-89746296  | 8.43159  | 5.83446  | 1.445136 | 0.531206 | 5.98316 | 2.19E-09 | 1.47E-07 | yes |
| PHF15    | 5:133861797-133918918 | 2.65792  | 1.84245  | 1.442601 | 0.528672 | 5.89705 | 3.70E-09 | 2.38E-07 | yes |
| SCFD2    | 4:53739148-54232242   | 2.13589  | 1.48291  | 1.440337 | 0.526406 | 3.84869 | 0.000119 | 0.002695 | yes |
| SERINC5  | 5:79407049-79551898   | 2.64792  | 1.84639  | 1.434107 | 0.520152 | 3.50484 | 0.000457 | 0.008301 | yes |
| TGFBR3   | 1:92145899-92371559   | 1.61721  | 1.128    | 1.433697 | 0.51974  | 4.38797 | 1.14E-05 | 0.000347 | yes |
| B7H6     | 11:17373308-17398868  | 1.11171  | 0.776557 | 1.431588 | 0.517617 | 3.95031 | 7.81E-05 | 0.001874 | yes |
| CDC42EP4 | 17:71279762-71308143  | 2.09076  | 1.46263  | 1.429452 | 0.515463 | 3.6969  | 0.000218 | 0.004527 | yes |
| CD68     | 17:7482804-7485429    | 29.8699  | 20.9017  | 1.429066 | 0.515072 | 7.07817 | 1.46E-12 | 1.74E-10 | yes |
| SPATA18  | 4:52917592-52963458   | 1.96569  | 1.37592  | 1.428637 | 0.514639 | 4.25305 | 2.11E-05 | 0.0006   | yes |
| RGL1     | 1:183605207-183897666 | 4.32307  | 3.03149  | 1.426055 | 0.512029 | 6.16437 | 7.08E-10 | 5.31E-08 | yes |
| CAD      | 2:27440257-27466654   | 1.64073  | 1.15096  | 1.425532 | 0.5115   | 4.92319 | 8.51E-07 | 3.34E-05 | yes |
| CAMK2N1  | 1:20808883-20812728   | 4.89981  | 3.45261  | 1.419161 | 0.505038 | 4.71474 | 2.42E-06 | 8.48E-05 | yes |
| IGF2BP3  | 7:23349827-23509995   | 3.74646  | 2.64134  | 1.418394 | 0.504258 | 5.42195 | 5.90E-08 | 2.87E-06 | yes |



|          |                        |         |          |          |          |         |          |          |     |
|----------|------------------------|---------|----------|----------|----------|---------|----------|----------|-----|
| PIK3R1   | 5:67511583-67597649    | 3.30526 | 2.33433  | 1.415935 | 0.501755 | 5.45088 | 5.01E-08 | 2.49E-06 | yes |
| NCAPD3   | 11:134022336-134094426 | 1.23084 | 0.871173 | 1.412854 | 0.498612 | 3.75368 | 0.000174 | 0.003731 | yes |
| MKI67    | 10:129894922-129924468 | 3.15522 | 2.24307  | 1.406652 | 0.492266 | 6.86397 | 6.70E-12 | 7.15E-10 | yes |
| SLC43A3  | 11:57174426-57195053   | 11.2311 | 8.00665  | 1.402721 | 0.488229 | 5.95268 | 2.64E-09 | 1.75E-07 | yes |
| CTSS     | 1:150702671-150738433  | 3.39805 | 2.42563  | 1.400894 | 0.486348 | 4.97935 | 6.38E-07 | 2.55E-05 | yes |
| IFI30    | 19:18284578-18288927   | 19.3064 | 13.7846  | 1.400577 | 0.486022 | 5.38693 | 7.17E-08 | 3.40E-06 | yes |
| CARD6    | 5:40841409-40855456    | 4.61878 | 3.29834  | 1.400335 | 0.485772 | 5.58706 | 2.31E-08 | 1.24E-06 | yes |
| PTX3     | 3:156977530-157221415  | 126.339 | 90.3325  | 1.3986   | 0.483983 | 5.71444 | 1.10E-08 | 6.32E-07 | yes |
| GPR68    | 14:91698875-91720224   | 7.91961 | 5.68157  | 1.393912 | 0.47914  | 5.7767  | 7.62E-09 | 4.59E-07 | yes |
| TNFRSF21 | 6:47199267-47277680    | 8.04996 | 5.80796  | 1.386022 | 0.47095  | 6.06388 | 1.33E-09 | 9.50E-08 | yes |
| TFPI2    | 7:93515744-93520065    | 384.439 | 277.916  | 1.383292 | 0.468106 | 5.61542 | 1.96E-08 | 1.07E-06 | yes |
| ABCA6    | 17:67074846-67138015   | 3.58598 | 2.59597  | 1.381364 | 0.466094 | 5.36915 | 7.91E-08 | 3.69E-06 | yes |
| CTSL1P8  | 9:90459659-90462339    | 110.044 | 79.6738  | 1.381182 | 0.465903 | 6.35044 | 2.15E-10 | 1.75E-08 | yes |
| SEMA3D   | 7:84624868-84751247    | 1.48283 | 1.07784  | 1.375742 | 0.46021  | 4.03914 | 5.36E-05 | 0.001368 | yes |
| SNX8     | 7:2291404-2354099      | 3.36755 | 2.45218  | 1.373288 | 0.457634 | 5.00036 | 5.72E-07 | 2.30E-05 | yes |
| EGFR     | 7:55086724-55275031    | 9.09437 | 6.62297  | 1.373156 | 0.457495 | 5.06002 | 4.19E-07 | 1.75E-05 | yes |
| ANPEP    | 15:90328125-90358072   | 58.0081 | 42.2954  | 1.371499 | 0.455754 | 5.94086 | 2.84E-09 | 1.87E-07 | yes |
| XPC      | 3:14186646-14220172    | 5.04751 | 3.69663  | 1.365436 | 0.449361 | 5.12651 | 2.95E-07 | 1.25E-05 | yes |
| FUT8     | 14:65877309-66210839   | 10.2275 | 7.49059  | 1.36538  | 0.449302 | 5.60637 | 2.07E-08 | 1.11E-06 | yes |
| CAPN5    | 11:76777991-76837201   | 2.42523 | 1.7803   | 1.362259 | 0.446001 | 4.1427  | 3.43E-05 | 0.000928 | yes |
| RFWD3    | 16:74655296-74700779   | 1.66752 | 1.22576  | 1.360397 | 0.444028 | 3.68847 | 0.000226 | 0.004657 | yes |
| BTN3A2   | 6:26365397-26378548    | 12.1514 | 8.93236  | 1.36038  | 0.444009 | 4.55611 | 5.21E-06 | 0.00017  | yes |
| TUBGCP6  | 22:50656117-50683400   | 3.29498 | 2.42375  | 1.359455 | 0.443029 | 5.21866 | 1.80E-07 | 7.89E-06 | yes |
| MMP15    | 16:58059281-58080805   | 5.65405 | 4.16121  | 1.358751 | 0.442282 | 5.54115 | 3.00E-08 | 1.56E-06 | yes |
| PNP      | 14:20937537-20946165   | 5.21239 | 3.84582  | 1.355339 | 0.438654 | 4.32016 | 1.56E-05 | 0.000456 | yes |
| CD82     | 11:44587140-44641339   | 8.05202 | 5.94261  | 1.354964 | 0.438254 | 3.87619 | 0.000106 | 0.002438 | yes |
| CORO2B   | 15:68871307-69020145   | 3.31479 | 2.44761  | 1.354297 | 0.437544 | 3.75591 | 0.000173 | 0.003709 | yes |
| FMNL2    | 2:153191750-153506348  | 13.5812 | 10.0309  | 1.353936 | 0.43716  | 6.06348 | 1.33E-09 | 9.50E-08 | yes |
| SLC5A3   | 21:35445822-35515334   | 1.3567  | 1.00293  | 1.352736 | 0.435881 | 4.53007 | 5.90E-06 | 0.00019  | yes |
| STMN1    | 1:26210676-26233368    | 10.2749 | 7.59622  | 1.352633 | 0.435771 | 3.60981 | 0.000306 | 0.005991 | yes |
| BTN3A3   | 6:26440699-26453643    | 12.6288 | 9.34225  | 1.351794 | 0.434876 | 4.09424 | 4.24E-05 | 0.001106 | yes |
| CTSL2    | 9:99791958-99801925    | 10.3538 | 7.66216  | 1.35129  | 0.434337 | 5.88949 | 3.87E-09 | 2.48E-07 | yes |
| SLC20A1  | 2:113403433-113421402  | 18.0317 | 13.3448  | 1.351215 | 0.434258 | 6.01583 | 1.79E-09 | 1.25E-07 | yes |
| DNMT1    | 19:10244021-10305755   | 2.92311 | 2.16612  | 1.349468 | 0.432391 | 4.44441 | 8.81E-06 | 0.000277 | yes |

|              |                        |         |          |          |          |         |          |          |     |
|--------------|------------------------|---------|----------|----------|----------|---------|----------|----------|-----|
| CENPF        | 1:214776531-214837914  | 1.00746 | 0.747651 | 1.3475   | 0.430286 | 3.57913 | 0.000345 | 0.006614 | yes |
| MTHFD1       | 14:64854758-64926725   | 3.21928 | 2.39232  | 1.345673 | 0.428328 | 4.03791 | 5.39E-05 | 0.00137  | yes |
| BTN3A1       | 6:26402464-26415444    | 10.1491 | 7.55559  | 1.343257 | 0.425735 | 3.9997  | 6.34E-05 | 0.001581 | yes |
| CTSL1        | 9:90340973-90346384    | 78.6862 | 58.5892  | 1.343015 | 0.425476 | 4.46654 | 7.95E-06 | 0.000252 | yes |
| KCNC4        | 1:110753335-110776674  | 2.14062 | 1.5941   | 1.342839 | 0.425287 | 3.75086 | 0.000176 | 0.003767 | yes |
| <b>NRP1</b>  | 10:33466418-33623833   | 83.1694 | 61.9658  | 1.342182 | 0.424581 | 4.67028 | 3.01E-06 | 0.000103 | yes |
| ARHGAP22     | 10:49654078-49813138   | 5.076   | 3.78339  | 1.341654 | 0.424013 | 4.38636 | 1.15E-05 | 0.000349 | yes |
| BIVM         | 13:103436630-103528351 | 2.6184  | 1.95199  | 1.3414   | 0.42374  | 5.24432 | 1.57E-07 | 6.98E-06 | yes |
| C11orf41     | 11:33563876-33695648   | 1.57889 | 1.17827  | 1.340007 | 0.42224  | 4.8925  | 9.96E-07 | 3.83E-05 | yes |
| ITPR3        | 6:33589155-33664351    | 2.97258 | 2.219    | 1.339603 | 0.421806 | 5.35305 | 8.65E-08 | 3.97E-06 | yes |
| CSF1         | 1:110453232-110472355  | 5.98236 | 4.468    | 1.338935 | 0.421086 | 4.11235 | 3.92E-05 | 0.001037 | yes |
| RHOJ         | 14:63671144-63758559   | 9.98096 | 7.45709  | 1.338452 | 0.420566 | 4.78849 | 1.68E-06 | 6.07E-05 | yes |
| TXNIP        | 1:145430993-145442635  | 48.0338 | 35.9145  | 1.337449 | 0.419484 | 5.5136  | 3.52E-08 | 1.81E-06 | yes |
| DNMBP        | 10:101635333-101769676 | 3.82265 | 2.86011  | 1.33654  | 0.418502 | 5.22372 | 1.75E-07 | 7.70E-06 | yes |
| CTSL1P2      | 10:48155942-48158691   | 31.6799 | 23.7239  | 1.335358 | 0.417227 | 5.44173 | 5.28E-08 | 2.58E-06 | yes |
| CNDP2        | 18:72163499-72190689   | 4.01754 | 3.01345  | 1.333203 | 0.414896 | 4.81345 | 1.48E-06 | 5.48E-05 | yes |
| LOC100506912 | 9:90479080-90481209    | 64.4061 | 48.4213  | 1.330119 | 0.411556 | 4.63883 | 3.50E-06 | 0.000118 | yes |
| ODC1         | 2:10580507-10588453    | 10.314  | 7.75668  | 1.329693 | 0.411093 | 4.84993 | 1.24E-06 | 4.63E-05 | yes |
| LHFPL2       | 5:77781037-77944648    | 16.5727 | 12.4929  | 1.326569 | 0.4077   | 5.64213 | 1.68E-08 | 9.31E-07 | yes |
| HSPH1        | 13:31710761-31736117   | 15.178  | 11.4557  | 1.32493  | 0.405916 | 5.62441 | 1.86E-08 | 1.02E-06 | yes |
| AHNAK2       | 14:105403590-105444694 | 17.7289 | 13.385   | 1.324535 | 0.405486 | 4.98238 | 6.28E-07 | 2.52E-05 | yes |
| MAN1A1       | 6:119280994-119670926  | 32.808  | 24.8009  | 1.322855 | 0.403655 | 5.44258 | 5.25E-08 | 2.57E-06 | yes |
| BDKRB2       | 14:96671134-96710666   | 30.3346 | 22.9479  | 1.32189  | 0.402602 | 5.45273 | 4.96E-08 | 2.47E-06 | yes |
| DOCK10       | 2:225629806-225907330  | 2.67228 | 2.02458  | 1.319918 | 0.400449 | 4.74337 | 2.10E-06 | 7.42E-05 | yes |
| TLE4         | 9:82186877-82341656    | 4.78013 | 3.62394  | 1.319042 | 0.399491 | 4.90279 | 9.45E-07 | 3.69E-05 | yes |
| FOSL1        | 11:65659691-65667997   | 13.8079 | 10.4683  | 1.31902  | 0.399467 | 4.80703 | 1.53E-06 | 5.62E-05 | yes |
| <b>MMP14</b> | 14:23305792-23316803   | 174.287 | 132.137  | 1.318987 | 0.39943  | 4.45598 | 8.35E-06 | 0.000264 | yes |
| RNF168       | 3:196195653-196230639  | 4.84445 | 3.67529  | 1.318114 | 0.398475 | 5.05674 | 4.26E-07 | 1.77E-05 | yes |
| CTSL3        | 9:90387829-90401799    | 48.389  | 36.7283  | 1.317485 | 0.397787 | 4.89884 | 9.64E-07 | 3.73E-05 | yes |
| ARMCX1       | X:100805513-100809683  | 7.86784 | 5.97904  | 1.315904 | 0.396054 | 4.36137 | 1.29E-05 | 0.000386 | yes |
| SYT11        | 1:155829259-155854990  | 7.88228 | 5.99929  | 1.313869 | 0.393821 | 5.38306 | 7.32E-08 | 3.46E-06 | yes |
| <b>BMP2</b>  | 20:6748744-6760910     | 33.3766 | 25.404   | 1.313832 | 0.393781 | 5.40781 | 6.38E-08 | 3.03E-06 | yes |
| SLC44A1      | 9:108006928-108153682  | 16.6341 | 12.7252  | 1.307178 | 0.386455 | 5.36235 | 8.21E-08 | 3.79E-06 | yes |
| PPFIBP1      | 12:27677044-27848497   | 6.27699 | 4.80421  | 1.30656  | 0.385774 | 4.31115 | 1.62E-05 | 0.000471 | yes |

|          |                       |          |          |          |          |         |          |          |     |
|----------|-----------------------|----------|----------|----------|----------|---------|----------|----------|-----|
| STK36    | 2:219528586-219567440 | 2.37542  | 1.8252   | 1.301457 | 0.380128 | 3.52648 | 0.000421 | 0.007759 | yes |
| TGFB1    | 19:41836811-41859831  | 13.7635  | 10.5802  | 1.300873 | 0.37948  | 4.93055 | 8.20E-07 | 3.23E-05 | yes |
| FAM198B  | 4:159045731-159094202 | 8.32673  | 6.40212  | 1.300621 | 0.3792   | 4.12052 | 3.78E-05 | 0.001007 | yes |
| RAB31    | 18:9708227-9862553    | 14.3482  | 11.0347  | 1.30028  | 0.378822 | 5.25493 | 1.48E-07 | 6.61E-06 | yes |
| AK5      | 1:77747661-78025654   | 3.34999  | 2.58265  | 1.297113 | 0.375305 | 3.55332 | 0.00038  | 0.007136 | yes |
| CD276    | 15:73976621-74006859  | 27.0966  | 20.9013  | 1.296407 | 0.374519 | 5.17585 | 2.27E-07 | 9.73E-06 | yes |
| HMGA2    | 12:66151799-66360071  | 11.2547  | 8.68281  | 1.296205 | 0.374294 | 4.60563 | 4.11E-06 | 0.000136 | yes |
| PCNA     | 20:5095598-5107268    | 17.3892  | 13.4326  | 1.294552 | 0.372453 | 4.43169 | 9.35E-06 | 0.000292 | yes |
| IL1R1    | 2:102770401-102796334 | 25.2119  | 19.4754  | 1.294551 | 0.372452 | 5.07243 | 3.93E-07 | 1.65E-05 | yes |
| RHBDF1   | 16:108057-122629      | 6.24751  | 4.83337  | 1.292578 | 0.370252 | 4.27383 | 1.92E-05 | 0.00055  | yes |
| MMP24    | 20:33814538-33864804  | 6.81119  | 5.2873   | 1.288217 | 0.365376 | 4.77569 | 1.79E-06 | 6.42E-05 | yes |
| B4GALT5  | 20:48249481-48330421  | 7.40624  | 5.75065  | 1.287896 | 0.365016 | 4.90552 | 9.32E-07 | 3.65E-05 | yes |
| VPS18    | 15:41186627-41196173  | 3.71234  | 2.88347  | 1.287456 | 0.364523 | 3.88758 | 0.000101 | 0.002342 | yes |
| ESF1     | 20:13694968-13765532  | 3.59044  | 2.78914  | 1.287293 | 0.36434  | 3.53511 | 0.000408 | 0.007558 | yes |
| HCP5     | 6:31430956-31433586   | 5.80976  | 4.53818  | 1.280196 | 0.356365 | 3.79118 | 0.00015  | 0.003303 | yes |
| CDK4     | 12:58138783-58146164  | 23.7341  | 18.5493  | 1.279515 | 0.355597 | 4.10984 | 3.96E-05 | 0.001043 | yes |
| LPHN2    | 1:82266081-82458107   | 8.81604  | 6.90112  | 1.27748  | 0.3533   | 4.88928 | 1.01E-06 | 3.88E-05 | yes |
| CTSC     | 11:88026759-88070941  | 34.496   | 27.0363  | 1.275914 | 0.351531 | 4.29897 | 1.72E-05 | 0.000495 | yes |
| FZD8     | 10:35927176-35930362  | 8.47194  | 6.66194  | 1.271693 | 0.34675  | 4.43276 | 9.30E-06 | 0.000291 | yes |
| FLG      | 1:152274650-152297679 | 0.929484 | 0.731606 | 1.270471 | 0.345363 | 3.45658 | 0.000547 | 0.00966  | yes |
| GFPT2    | 5:179727699-179780315 | 17.5497  | 13.8326  | 1.26872  | 0.343374 | 4.75383 | 2.00E-06 | 7.10E-05 | yes |
| POLR1A   | 2:86253450-86333278   | 1.99701  | 1.57601  | 1.26713  | 0.341565 | 3.57042 | 0.000356 | 0.006784 | yes |
| KIAA0930 | 22:45588122-45636650  | 2.99167  | 2.36786  | 1.263449 | 0.337367 | 3.92867 | 8.54E-05 | 0.002032 | yes |
| S1PR3    | 9:91605777-91619925   | 4.43468  | 3.51194  | 1.262744 | 0.336562 | 3.87376 | 0.000107 | 0.002455 | yes |
| LRR15    | 3:194075975-194090472 | 8.1559   | 6.47126  | 1.260326 | 0.333797 | 4.45536 | 8.38E-06 | 0.000264 | yes |
| FASN     | 17:80036213-80056106  | 2.74411  | 2.18397  | 1.256478 | 0.329385 | 4.11683 | 3.84E-05 | 0.001019 | yes |
| ARHGEF40 | 14:21538526-21558036  | 5.68627  | 4.52586  | 1.256395 | 0.329291 | 4.36188 | 1.29E-05 | 0.000386 | yes |
| RIN2     | 20:19867164-19983103  | 4.06033  | 3.23459  | 1.255284 | 0.328014 | 3.73448 | 0.000188 | 0.003974 | yes |
| CPT1A    | 11:68522087-68609399  | 6.66341  | 5.3339   | 1.249257 | 0.32107  | 3.87613 | 0.000106 | 0.002438 | yes |
| MARVELD1 | 10:99473464-99493298  | 13.5913  | 10.9025  | 1.246622 | 0.318024 | 4.02772 | 5.63E-05 | 0.001419 | yes |
| USP5     | 12:6961284-6975796    | 6.20465  | 4.98262  | 1.245259 | 0.316445 | 3.67738 | 0.000236 | 0.004809 | yes |
| CTHRC1   | 8:104383785-104395217 | 71.3557  | 57.34    | 1.244431 | 0.315487 | 4.37789 | 1.20E-05 | 0.000361 | yes |
| GNPDA1   | 5:141380233-141392620 | 9.51457  | 7.66915  | 1.240629 | 0.311072 | 3.76231 | 0.000168 | 0.003642 | yes |
| PHLDA1   | 12:76419226-76425556  | 19.7046  | 15.8846  | 1.240484 | 0.310904 | 4.24504 | 2.19E-05 | 0.00062  | yes |

|              |                        |         |         |          |          |         |          |          |     |
|--------------|------------------------|---------|---------|----------|----------|---------|----------|----------|-----|
| CCND1        | 11:69455872-69469242   | 77.6181 | 62.5755 | 1.240391 | 0.310795 | 3.8179  | 0.000135 | 0.002998 | yes |
| PRNP         | 20:4666796-4682234     | 119.637 | 96.5328 | 1.23934  | 0.309573 | 3.60868 | 0.000308 | 0.006008 | yes |
| SCAP         | 3:47455183-47517445    | 4.19896 | 3.38844 | 1.239202 | 0.309411 | 3.56874 | 0.000359 | 0.006809 | yes |
| SLC22A23     | 6:3228158-3456793      | 6.19312 | 5.00332 | 1.237802 | 0.307781 | 4.13457 | 3.56E-05 | 0.000954 | yes |
| NBN          | 8:90945563-90996899    | 4.39676 | 3.55722 | 1.23601  | 0.305691 | 3.66959 | 0.000243 | 0.00493  | yes |
| CHPF         | 2:220403668-220408487  | 25.0437 | 20.2999 | 1.233686 | 0.302975 | 3.94442 | 8.00E-05 | 0.001911 | yes |
| TMEM132A     | 11:60691912-60719257   | 34.854  | 28.2808 | 1.232426 | 0.301501 | 3.96427 | 7.36E-05 | 0.001786 | yes |
| RAC2         | 22:37621309-37640305   | 27.109  | 21.998  | 1.232339 | 0.3014   | 4.07818 | 4.54E-05 | 0.001178 | yes |
| EMP3         | 19:48828628-48833810   | 37.6514 | 30.5589 | 1.232093 | 0.301111 | 3.81286 | 0.000137 | 0.003045 | yes |
| NBPF10       | 1:145293370-145368684  | 40.4249 | 32.8172 | 1.231821 | 0.300792 | 3.52205 | 0.000428 | 0.007865 | yes |
| SH2B3        | 12:111843751-111889427 | 6.7173  | 5.45715 | 1.230917 | 0.299734 | 4.06509 | 4.80E-05 | 0.001238 | yes |
| ZMAT3        | 3:178735010-178789656  | 4.24759 | 3.46118 | 1.227209 | 0.295381 | 4.06977 | 4.71E-05 | 0.001217 | yes |
| TTYH3        | 7:2671602-2704436      | 21.8028 | 17.7818 | 1.22613  | 0.294112 | 4.03849 | 5.38E-05 | 0.001369 | yes |
| IFNAR1       | 21:34697213-34732129   | 4.98744 | 4.06935 | 1.225611 | 0.293501 | 3.88554 | 0.000102 | 0.002354 | yes |
| PRRX1        | 1:170633312-170708541  | 31.6513 | 25.8403 | 1.224881 | 0.292642 | 3.46383 | 0.000533 | 0.009449 | yes |
| LMNB2        | 19:2428163-2456958     | 6.31382 | 5.15633 | 1.224479 | 0.292169 | 3.83865 | 0.000124 | 0.002785 | yes |
| MAN2A1       | 5:109025155-109203429  | 7.269   | 5.93815 | 1.224119 | 0.291743 | 3.96963 | 7.20E-05 | 0.00175  | yes |
| CD47         | 3:107761940-107809935  | 6.78989 | 5.55849 | 1.221535 | 0.288695 | 3.91238 | 9.14E-05 | 0.002155 | yes |
| CSGALNACT2   | 10:43633933-43680750   | 12.1603 | 9.95507 | 1.221518 | 0.288675 | 3.9825  | 6.82E-05 | 0.00168  | yes |
| C5orf30      | 5:102594441-102614361  | 7.16369 | 5.87183 | 1.22001  | 0.286893 | 3.48867 | 0.000485 | 0.008743 | yes |
| PYHIN1       | 1:158901341-158946844  | 12.9657 | 10.6363 | 1.219005 | 0.285704 | 3.44916 | 0.000562 | 0.009893 | yes |
| ARRDC4       | 15:98503932-98517068   | 7.16271 | 5.87612 | 1.218952 | 0.285642 | 3.7465  | 0.000179 | 0.003822 | yes |
| TTL          | 13:40921268-41055143   | 4.65106 | 3.81608 | 1.218806 | 0.285468 | 3.59895 | 0.00032  | 0.006196 | yes |
| LOC100652752 | 16:32164129-32191996   | 9.59284 | 7.87423 | 1.218258 | 0.284819 | 3.71053 | 0.000207 | 0.004344 | yes |
| NBPF8        | 1:144146786-144224264  | 3.54834 | 2.91269 | 1.218235 | 0.284792 | 3.846   | 0.00012  | 0.002716 | yes |
| LENG8        | 19:54960064-54974894   | 7.5477  | 6.21099 | 1.215217 | 0.281214 | 3.64392 | 0.000269 | 0.005373 | yes |
| DST          | 6:56322784-56507694    | 8.6748  | 7.13858 | 1.2152   | 0.281193 | 3.70924 | 0.000208 | 0.004359 | yes |
| ELTD1        | 1:79355448-79472495    | 13.0699 | 10.7604 | 1.21463  | 0.280516 | 3.87585 | 0.000106 | 0.002438 | yes |
| DIAPH1       | 5:140894587-140998622  | 4.41122 | 3.63206 | 1.214523 | 0.28039  | 3.5744  | 0.000351 | 0.006715 | yes |
| LOC100288142 | 1:148250248-148278218  | 24.6713 | 20.3199 | 1.214145 | 0.27994  | 3.78211 | 0.000156 | 0.003407 | yes |
| DDX23        | 12:49223538-49245957   | 7.602   | 6.26794 | 1.212839 | 0.278388 | 3.52132 | 0.000429 | 0.007871 | yes |
| HERC2P3      | 15:20613648-20711433   | 8.53303 | 7.03593 | 1.212779 | 0.278317 | 3.77799 | 0.000158 | 0.003451 | yes |
| SH3PXD2B     | 5:171760502-171881527  | 7.30642 | 6.02982 | 1.211714 | 0.27705  | 3.85254 | 0.000117 | 0.002661 | yes |
| EDEM3        | 1:184659624-184724041  | 7.77074 | 6.41459 | 1.211416 | 0.276695 | 3.84268 | 0.000122 | 0.002748 | yes |

|         |                        |         |         |          |          |         |          |          |     |
|---------|------------------------|---------|---------|----------|----------|---------|----------|----------|-----|
| IGFBP6  | 12:53491435-53496128   | 49.7276 | 41.0794 | 1.210524 | 0.275632 | 3.77124 | 0.000162 | 0.00353  | yes |
| TMEM181 | 6:158957467-159056467  | 9.63327 | 7.96162 | 1.209964 | 0.274964 | 3.81823 | 0.000134 | 0.002998 | yes |
| MDM2    | 12:69201970-69239212   | 10.9419 | 9.05958 | 1.207771 | 0.272347 | 3.77328 | 0.000161 | 0.003507 | yes |
| ZC3H7B  | 22:41697566-41756151   | 8.0625  | 6.67911 | 1.207122 | 0.271571 | 3.76071 | 0.000169 | 0.003654 | yes |
| NBPF16  | 1:148739441-148758311  | 32.3159 | 26.8228 | 1.204792 | 0.268784 | 3.65917 | 0.000253 | 0.005092 | yes |
| GTF3C1  | 16:27471933-27561251   | 4.93515 | 4.09896 | 1.204001 | 0.267836 | 3.62945 | 0.000284 | 0.00563  | yes |
| SF3B3   | 16:70557690-70611571   | 3.41951 | 2.85181 | 1.199067 | 0.261912 | 3.52959 | 0.000416 | 0.007696 | yes |
| CPXM2   | 10:125505151-125651500 | 15.2215 | 12.7264 | 1.196057 | 0.258286 | 3.59022 | 0.00033  | 0.006381 | yes |
| TNS3    | 7:47314751-47621742    | 13.211  | 11.0509 | 1.195468 | 0.257576 | 3.53983 | 0.0004   | 0.007463 | yes |
| NBPF11  | 1:146032541-146082633  | 23.9644 | 20.0635 | 1.194428 | 0.25632  | 3.47332 | 0.000514 | 0.009178 | yes |
| NBPF14  | 1:148003641-148025848  | 27.9643 | 23.49   | 1.190477 | 0.25154  | 3.45859 | 0.000543 | 0.0096   | yes |
| AMOTL1  | 11:94501507-94609918   | 5.35174 | 4.49667 | 1.190156 | 0.251151 | 3.48304 | 0.000496 | 0.008887 | yes |

## Supplemental Table IV: GO Terms for Genes Downregulated with *SENCR* Knockdown

### Biological Process (BP)

| Term                                                        | Count | %        | p value  | Fold Enri | Bonferro | Benjamir | FDR      |
|-------------------------------------------------------------|-------|----------|----------|-----------|----------|----------|----------|
| GO:0006414~translational elongation                         | 27    | 0.435835 | 2.35E-18 | 9.529253  | 5.43E-15 | 5.43E-15 | 4.11E-15 |
| GO:0006412~translation                                      | 36    | 0.581114 | 1.25E-11 | 3.876957  | 2.88E-08 | 1.44E-08 | 2.18E-08 |
| GO:0030029~actin filament-based process                     | 29    | 0.468119 | 1.72E-10 | 4.289409  | 3.97E-07 | 1.32E-07 | 3.01E-07 |
| GO:0019318~hexose metabolic process                         | 25    | 0.403551 | 8.06E-10 | 4.641467  | 1.86E-06 | 4.65E-07 | 1.41E-06 |
| GO:0006006~glucose metabolic process                        | 22    | 0.355125 | 1.70E-09 | 5.125635  | 3.92E-06 | 7.84E-07 | 2.97E-06 |
| GO:0005996~monosaccharide metabolic process                 | 26    | 0.419693 | 3.22E-09 | 4.174811  | 7.44E-06 | 1.24E-06 | 5.63E-06 |
| GO:0006096~glycolysis                                       | 13    | 0.209847 | 4.21E-09 | 9.85966   | 9.72E-06 | 1.39E-06 | 7.36E-06 |
| GO:0065008~regulation of biological quality                 | 78    | 1.25908  | 3.45E-08 | 1.892733  | 7.97E-05 | 9.96E-06 | 6.03E-05 |
| GO:0031032~actomyosin structure organization                | 10    | 0.161421 | 4.14E-08 | 12.73088  | 9.56E-05 | 1.06E-05 | 7.24E-05 |
| GO:0006007~glucose catabolic process                        | 13    | 0.209847 | 5.44E-08 | 7.989725  | 1.26E-04 | 1.26E-05 | 9.51E-05 |
| GO:0030036~actin cytoskeleton organization                  | 24    | 0.387409 | 9.27E-08 | 3.785465  | 2.14E-04 | 1.95E-05 | 1.62E-04 |
| GO:0030048~actin filament-based movement                    | 9     | 0.145278 | 1.19E-07 | 13.94862  | 2.74E-04 | 2.29E-05 | 2.08E-04 |
| GO:0019320~hexose catabolic process                         | 13    | 0.209847 | 4.07E-07 | 6.716001  | 9.40E-04 | 7.23E-05 | 7.12E-04 |
| GO:0007517~muscle organ development                         | 22    | 0.355125 | 4.91E-07 | 3.716693  | 0.001134 | 8.11E-05 | 8.59E-04 |
| GO:0046365~monosaccharide catabolic process                 | 13    | 0.209847 | 5.62E-07 | 6.526817  | 0.001298 | 8.66E-05 | 9.83E-04 |
| GO:0044275~cellular carbohydrate catabolic process          | 14    | 0.225989 | 6.30E-07 | 5.871182  | 0.001454 | 9.09E-05 | 0.001102 |
| GO:0022603~regulation of anatomical structure morphogenesis | 22    | 0.355125 | 9.07E-07 | 3.580923  | 0.002093 | 1.23E-04 | 0.001586 |
| GO:0003012~muscle system process                            | 19    | 0.306699 | 1.12E-06 | 4.031445  | 0.002572 | 1.43E-04 | 0.00195  |
| GO:0045765~regulation of angiogenesis                       | 12    | 0.193705 | 1.19E-06 | 6.789803  | 0.002753 | 1.45E-04 | 0.002087 |
| GO:0006936~muscle contraction                               | 18    | 0.290557 | 1.33E-06 | 4.193702  | 0.003076 | 1.54E-04 | 0.002333 |
| GO:0046164~alcohol catabolic process                        | 13    | 0.209847 | 2.41E-06 | 5.721038  | 0.00556  | 2.65E-04 | 0.004221 |
| GO:0006928~cell motion                                      | 33    | 0.532688 | 4.17E-06 | 2.476491  | 0.009573 | 4.37E-04 | 0.007283 |
| GO:0005975~carbohydrate metabolic process                   | 35    | 0.564972 | 5.93E-06 | 2.354012  | 0.013592 | 5.95E-04 | 0.01036  |
| GO:0030198~extracellular matrix organization                | 14    | 0.225989 | 6.45E-06 | 4.798563  | 0.014789 | 6.21E-04 | 0.011279 |
| GO:0016052~carbohydrate catabolic process                   | 14    | 0.225989 | 1.09E-05 | 4.578445  | 0.024786 | 0.001003 | 0.019    |
| GO:0044262~cellular carbohydrate metabolic process          | 28    | 0.451977 | 1.26E-05 | 2.579072  | 0.028659 | 0.001118 | 0.022012 |
| GO:0006091~generation of precursor metabolites and energy   | 24    | 0.387409 | 2.47E-05 | 2.733275  | 0.055489 | 0.002112 | 0.043212 |
| GO:0016051~carbohydrate biosynthetic process                | 13    | 0.209847 | 4.40E-05 | 4.330879  | 0.096616 | 0.003622 | 0.076898 |
| GO:0006082~organic acid metabolic process                   | 34    | 0.54883  | 4.56E-05 | 2.16425   | 0.099838 | 0.00362  | 0.079601 |
| GO:0010941~regulation of cell death                         | 44    | 0.71025  | 4.56E-05 | 1.924472  | 0.100034 | 0.003507 | 0.079766 |

|                                                           |     |          |          |          |          |          |          |
|-----------------------------------------------------------|-----|----------|----------|----------|----------|----------|----------|
| GO:0043062~extracellular structure organization           | 16  | 0.258273 | 5.36E-05 | 3.499039 | 0.116407 | 0.003984 | 0.093655 |
| GO:0048731~system development                             | 96  | 1.549637 | 6.09E-05 | 1.468696 | 0.131252 | 0.004387 | 0.10647  |
| GO:0030049~muscle filament sliding                        | 5   | 0.08071  | 6.81E-05 | 19.80359 | 0.14543  | 0.004751 | 0.118914 |
| GO:0033275~actin-myosin filament sliding                  | 5   | 0.08071  | 6.81E-05 | 19.80359 | 0.14543  | 0.004751 | 0.118914 |
| GO:0070252~actin-mediated cell contraction                | 5   | 0.08071  | 6.81E-05 | 19.80359 | 0.14543  | 0.004751 | 0.118914 |
| GO:0006066~alcohol metabolic process                      | 28  | 0.451977 | 7.64E-05 | 2.326576 | 0.161813 | 0.005178 | 0.133551 |
| GO:0043067~regulation of programmed cell death            | 43  | 0.694108 | 8.75E-05 | 1.887682 | 0.183021 | 0.005759 | 0.152926 |
| GO:0030705~cytoskeleton-dependent intracellular transport | 9   | 0.145278 | 8.96E-05 | 6.16958  | 0.186983 | 0.005734 | 0.156601 |
| GO:0043436~oxoacid metabolic process                      | 33  | 0.532688 | 9.19E-05 | 2.115707 | 0.191187 | 0.005718 | 0.160519 |
| GO:0019752~carboxylic acid metabolic process              | 33  | 0.532688 | 9.19E-05 | 2.115707 | 0.191187 | 0.005718 | 0.160519 |
| GO:0042060~wound healing                                  | 17  | 0.274415 | 9.44E-05 | 3.172722 | 0.195915 | 0.005722 | 0.164951 |
| GO:0048519~negative regulation of biological process      | 78  | 1.25908  | 9.71E-05 | 1.53445  | 0.200791 | 0.005731 | 0.169548 |
| GO:0016477~cell migration                                 | 21  | 0.338983 | 1.01E-04 | 2.712231 | 0.207645 | 0.005802 | 0.176058 |
| GO:0007507~heart development                              | 18  | 0.290557 | 1.17E-04 | 2.984355 | 0.236052 | 0.006546 | 0.203648 |
| GO:0034637~cellular carbohydrate biosynthetic process     | 10  | 0.161421 | 1.23E-04 | 5.166154 | 0.247773 | 0.006756 | 0.215329 |
| GO:0014706~striated muscle tissue development             | 13  | 0.209847 | 1.25E-04 | 3.894152 | 0.250139 | 0.006672 | 0.217709 |
| GO:0042180~cellular ketone metabolic process              | 33  | 0.532688 | 1.33E-04 | 2.074662 | 0.264695 | 0.006964 | 0.232516 |
| GO:0042981~regulation of apoptosis                        | 42  | 0.677966 | 1.45E-04 | 1.862129 | 0.283939 | 0.007395 | 0.252546 |
| GO:0042692~muscle cell differentiation                    | 13  | 0.209847 | 1.46E-04 | 3.829785 | 0.286603 | 0.007315 | 0.255361 |
| GO:0007155~cell adhesion                                  | 38  | 0.613398 | 1.51E-04 | 1.935094 | 0.294349 | 0.00739  | 0.263605 |
| GO:0022610~biological adhesion                            | 38  | 0.613398 | 1.56E-04 | 1.932333 | 0.301735 | 0.007455 | 0.27155  |
| GO:0030336~negative regulation of cell migration          | 9   | 0.145278 | 1.74E-04 | 5.628389 | 0.331302 | 0.008179 | 0.304213 |
| GO:0048856~anatomical structure development               | 100 | 1.614205 | 1.89E-04 | 1.410624 | 0.3532   | 0.008677 | 0.329341 |
| GO:0060537~muscle tissue development                      | 13  | 0.209847 | 1.99E-04 | 3.707232 | 0.368642 | 0.008977 | 0.347574 |
| GO:0008285~negative regulation of cell proliferation      | 24  | 0.387409 | 2.16E-04 | 2.369848 | 0.392348 | 0.009534 | 0.376444 |
| GO:0048513~organ development                              | 74  | 1.194512 | 2.21E-04 | 1.517744 | 0.400028 | 0.009593 | 0.386037 |
| GO:0006916~anti-apoptosis                                 | 17  | 0.274415 | 2.26E-04 | 2.941699 | 0.406192 | 0.009605 | 0.393826 |
| GO:0032879~regulation of localization                     | 34  | 0.54883  | 2.33E-04 | 1.986852 | 0.415766 | 0.009724 | 0.406083 |
| GO:0015804~neutral amino acid transport                   | 6   | 0.096852 | 2.35E-04 | 10.1847  | 0.418835 | 0.009645 | 0.410054 |
| GO:0030239~myofibril assembly                             | 6   | 0.096852 | 2.35E-04 | 10.1847  | 0.418835 | 0.009645 | 0.410054 |
| GO:0044267~cellular protein metabolic process             | 94  | 1.517353 | 2.39E-04 | 1.422831 | 0.423655 | 0.009621 | 0.416334 |
| GO:0007010~cytoskeleton organization                      | 27  | 0.435835 | 2.45E-04 | 2.207465 | 0.432721 | 0.009727 | 0.428287 |
| GO:0045785~positive regulation of cell adhesion           | 9   | 0.145278 | 2.51E-04 | 5.34697  | 0.439698 | 0.00977  | 0.437615 |
| GO:0040013~negative regulation of locomotion              | 9   | 0.145278 | 2.82E-04 | 5.259314 | 0.478326 | 0.010787 | 0.491446 |

|                                                                |     |          |          |          |          |          |          |
|----------------------------------------------------------------|-----|----------|----------|----------|----------|----------|----------|
| GO:0051270~regulation of cell motion                           | 16  | 0.258273 | 3.49E-04 | 2.955147 | 0.553789 | 0.013142 | 0.609094 |
| GO:0051271~negative regulation of cell motion                  | 9   | 0.145278 | 3.53E-04 | 5.092352 | 0.557455 | 0.013063 | 0.615302 |
| GO:0032502~developmental process                               | 118 | 1.904762 | 3.61E-04 | 1.336176 | 0.565373 | 0.013139 | 0.628885 |
| GO:0001558~regulation of cell growth                           | 16  | 0.258273 | 3.69E-04 | 2.939915 | 0.573063 | 0.013211 | 0.642315 |
| GO:0006915~apoptosis                                           | 33  | 0.532688 | 3.89E-04 | 1.954042 | 0.592487 | 0.013716 | 0.677335 |
| GO:0048870~cell motility                                       | 21  | 0.338983 | 4.12E-04 | 2.438358 | 0.614227 | 0.014328 | 0.718555 |
| GO:0051674~localization of cell                                | 21  | 0.338983 | 4.12E-04 | 2.438358 | 0.614227 | 0.014328 | 0.718555 |
| GO:0009987~cellular process                                    | 324 | 5.230024 | 4.30E-04 | 1.09567  | 0.629188 | 0.014698 | 0.748282 |
| GO:0044057~regulation of system process                        | 21  | 0.338983 | 4.48E-04 | 2.422575 | 0.644578 | 0.015097 | 0.780129 |
| GO:0012501~programmed cell death                               | 33  | 0.532688 | 5.04E-04 | 1.925259 | 0.687845 | 0.016732 | 0.87759  |
| GO:0042221~response to chemical stimulus                       | 57  | 0.920097 | 5.08E-04 | 1.586142 | 0.690481 | 0.016614 | 0.883956 |
| GO:0009888~tissue development                                  | 35  | 0.564972 | 5.17E-04 | 1.87613  | 0.696727 | 0.016664 | 0.899251 |
| GO:0051240~positive regulation of multicellular organismal prc | 18  | 0.290557 | 5.19E-04 | 2.629657 | 0.698328 | 0.016507 | 0.903222 |
| GO:0008219~cell death                                          | 37  | 0.597256 | 5.19E-04 | 1.83438  | 0.698687 | 0.016299 | 0.904116 |
| GO:0060548~negative regulation of cell death                   | 23  | 0.371267 | 5.23E-04 | 2.277413 | 0.700848 | 0.016176 | 0.909516 |
| GO:0009064~glutamine family amino acid metabolic process       | 8   | 0.129136 | 5.75E-04 | 5.484071 | 0.735105 | 0.017556 | 1.000714 |
| GO:0055002~striated muscle cell development                    | 8   | 0.129136 | 5.75E-04 | 5.484071 | 0.735105 | 0.017556 | 1.000714 |
| GO:0016265~death                                               | 37  | 0.597256 | 5.92E-04 | 1.821712 | 0.745133 | 0.017826 | 1.029635 |
| GO:0007275~multicellular organismal development                | 108 | 1.743341 | 6.03E-04 | 1.343741 | 0.751731 | 0.017931 | 1.049289 |
| GO:0060341~regulation of cellular localization                 | 18  | 0.290557 | 6.24E-04 | 2.587243 | 0.763515 | 0.018316 | 1.08571  |
| GO:0040008~regulation of growth                                | 22  | 0.355125 | 6.25E-04 | 2.299772 | 0.763982 | 0.018111 | 1.087192 |
| GO:0032535~regulation of cellular component size               | 19  | 0.306699 | 6.31E-04 | 2.499199 | 0.766955 | 0.018042 | 1.096686 |
| GO:0045766~positive regulation of angiogenesis                 | 6   | 0.096852 | 6.77E-04 | 8.226107 | 0.790689 | 0.019123 | 1.177079 |
| GO:0007229~integrin-mediated signaling pathway                 | 9   | 0.145278 | 7.26E-04 | 4.583117 | 0.813071 | 0.020244 | 1.261659 |
| GO:0003013~circulatory system process                          | 15  | 0.242131 | 7.54E-04 | 2.874715 | 0.82473  | 0.020762 | 1.309791 |
| GO:0008015~blood circulation                                   | 15  | 0.242131 | 7.54E-04 | 2.874715 | 0.82473  | 0.020762 | 1.309791 |
| GO:0051146~striated muscle cell differentiation                | 10  | 0.161421 | 7.80E-04 | 4.050735 | 0.834959 | 0.021219 | 1.354711 |
| GO:0046942~carboxylic acid transport                           | 13  | 0.209847 | 8.74E-04 | 3.152408 | 0.867348 | 0.023485 | 1.51774  |
| GO:0007015~actin filament organization                         | 9   | 0.145278 | 8.77E-04 | 4.455808 | 0.868114 | 0.023281 | 1.522056 |
| GO:0055001~muscle cell development                             | 8   | 0.129136 | 9.06E-04 | 5.092352 | 0.87668  | 0.02377  | 1.572111 |
| GO:0006865~amino acid transport                                | 10  | 0.161421 | 9.18E-04 | 3.960718 | 0.880059 | 0.023811 | 1.592815 |
| GO:0015849~organic acid transport                              | 13  | 0.209847 | 9.28E-04 | 3.131108 | 0.882837 | 0.023804 | 1.610274 |
| GO:0030334~regulation of cell migration                        | 14  | 0.225989 | 9.43E-04 | 2.952962 | 0.88684  | 0.02392  | 1.636163 |
| GO:0043066~negative regulation of apoptosis                    | 22  | 0.355125 | 0.001008 | 2.215317 | 0.902618 | 0.02527  | 1.747928 |



|                                                           |     |          |          |          |          |          |          |
|-----------------------------------------------------------|-----|----------|----------|----------|----------|----------|----------|
| GO:0050900~leukocyte migration                            | 8   | 0.129136 | 0.001008 | 5.003013 | 0.902679 | 0.025005 | 1.748398 |
| GO:0040012~regulation of locomotion                       | 15  | 0.242131 | 0.001021 | 2.78488  | 0.905505 | 0.025049 | 1.770314 |
| GO:0006090~pyruvate metabolic process                     | 7   | 0.112994 | 0.001033 | 5.941077 | 0.908114 | 0.025076 | 1.791132 |
| GO:0043069~negative regulation of programmed cell death   | 22  | 0.355125 | 0.001202 | 2.184463 | 0.937726 | 0.0288   | 2.079953 |
| GO:0048523~negative regulation of cellular process        | 68  | 1.097659 | 0.001214 | 1.460217 | 0.939443 | 0.028788 | 2.10068  |
| GO:0051049~regulation of transport                        | 25  | 0.403551 | 0.001254 | 2.048647 | 0.944877 | 0.029436 | 2.170341 |
| GO:0050793~regulation of developmental process            | 34  | 0.54883  | 0.001295 | 1.79819  | 0.949828 | 0.030072 | 2.240013 |
| GO:0051051~negative regulation of transport               | 12  | 0.193705 | 0.00144  | 3.168575 | 0.964137 | 0.033058 | 2.488211 |
| GO:0019538~protein metabolic process                      | 104 | 1.678773 | 0.001558 | 1.318361 | 0.9727   | 0.035368 | 2.689403 |
| GO:0051239~regulation of multicellular organismal process | 43  | 0.694108 | 0.001661 | 1.635857 | 0.978451 | 0.037281 | 2.863524 |
| GO:0060048~cardiac muscle contraction                     | 5   | 0.08071  | 0.001677 | 9.380649 | 0.979232 | 0.037272 | 2.890693 |
| GO:0006541~glutamine metabolic process                    | 5   | 0.08071  | 0.001677 | 9.380649 | 0.979232 | 0.037272 | 2.890693 |
| GO:0006950~response to stress                             | 68  | 1.097659 | 0.001774 | 1.438552 | 0.983408 | 0.039013 | 3.055578 |
| GO:0009605~response to external stimulus                  | 42  | 0.677966 | 0.001883 | 1.638021 | 0.987123 | 0.040986 | 3.241466 |
| GO:0043065~positive regulation of apoptosis               | 24  | 0.387409 | 0.002317 | 1.98957  | 0.995285 | 0.04974  | 3.974685 |
| GO:0040011~locomotion                                     | 24  | 0.387409 | 0.002391 | 1.984954 | 0.996026 | 0.050815 | 4.098944 |
| GO:0060538~skeletal muscle organ development              | 8   | 0.129136 | 0.002397 | 4.320784 | 0.996076 | 0.050464 | 4.108132 |
| GO:0007519~skeletal muscle tissue development             | 8   | 0.129136 | 0.002397 | 4.320784 | 0.996076 | 0.050464 | 4.108132 |
| GO:0043068~positive regulation of programmed cell death   | 24  | 0.387409 | 0.002586 | 1.975786 | 0.997466 | 0.053848 | 4.425123 |
| GO:0010942~positive regulation of cell death              | 24  | 0.387409 | 0.002709 | 1.966701 | 0.998097 | 0.05585  | 4.631974 |
| GO:0042274~ribosomal small subunit biogenesis             | 4   | 0.064568 | 0.003035 | 12.96235 | 0.999105 | 0.061809 | 5.174812 |
| GO:0006929~substrate-bound cell migration                 | 4   | 0.064568 | 0.003035 | 12.96235 | 0.999105 | 0.061809 | 5.174812 |
| GO:0010927~cellular component assembly involved in morpho | 6   | 0.096852 | 0.003086 | 5.941077 | 0.999205 | 0.062271 | 5.25986  |
| GO:0046364~monosaccharide biosynthetic process            | 6   | 0.096852 | 0.003488 | 5.780508 | 0.999686 | 0.069497 | 5.92502  |
| GO:0060047~heart contraction                              | 5   | 0.08071  | 0.003507 | 7.749231 | 0.9997   | 0.069262 | 5.955995 |
| GO:0003015~heart process                                  | 5   | 0.08071  | 0.003507 | 7.749231 | 0.9997   | 0.069262 | 5.955995 |
| GO:0001568~blood vessel development                       | 16  | 0.258273 | 0.003811 | 2.327932 | 0.999852 | 0.074414 | 6.456329 |
| GO:0006937~regulation of muscle contraction               | 8   | 0.129136 | 0.003931 | 3.960718 | 0.999888 | 0.076036 | 6.653762 |
| GO:0009611~response to wounding                           | 27  | 0.435835 | 0.004028 | 1.815952 | 0.99991  | 0.077194 | 6.812333 |
| GO:0046394~carboxylic acid biosynthetic process           | 12  | 0.193705 | 0.004245 | 2.759726 | 0.999946 | 0.080523 | 7.166642 |
| GO:0016053~organic acid biosynthetic process              | 12  | 0.193705 | 0.004245 | 2.759726 | 0.999946 | 0.080523 | 7.166642 |
| GO:0051147~regulation of muscle cell differentiation      | 6   | 0.096852 | 0.004402 | 5.484071 | 0.999962 | 0.082699 | 7.421768 |
| GO:0001666~response to hypoxia                            | 11  | 0.177563 | 0.004414 | 2.926202 | 0.999963 | 0.082247 | 7.441204 |
| GO:0051046~regulation of secretion                        | 14  | 0.225989 | 0.0045   | 2.470547 | 0.99997  | 0.083127 | 7.581925 |

|                                                               |    |          |          |          |          |          |          |
|---------------------------------------------------------------|----|----------|----------|----------|----------|----------|----------|
| GO:0006520~cellular amino acid metabolic process              | 15 | 0.242131 | 0.004595 | 2.365916 | 0.999976 | 0.084131 | 7.735325 |
| GO:0001944~vasculature development                            | 16 | 0.258273 | 0.004751 | 2.272285 | 0.999983 | 0.086197 | 7.9888   |
| GO:0048742~regulation of skeletal muscle fiber development    | 5  | 0.08071  | 0.004794 | 7.129293 | 0.999985 | 0.086256 | 8.057085 |
| GO:0032787~monocarboxylic acid metabolic process              | 18 | 0.290557 | 0.004842 | 2.131682 | 0.999986 | 0.08641  | 8.134365 |
| GO:0051128~regulation of cellular component organization      | 24 | 0.387409 | 0.005031 | 1.867937 | 0.999991 | 0.088967 | 8.440412 |
| GO:0030155~regulation of cell adhesion                        | 11 | 0.177563 | 0.005157 | 2.862125 | 0.999993 | 0.090403 | 8.642602 |
| GO:0015837~amine transport                                    | 10 | 0.161421 | 0.005878 | 3.020887 | 0.999999 | 0.101643 | 9.79307  |
| GO:0002526~acute inflammatory response                        | 9  | 0.145278 | 0.006162 | 3.273655 | 0.999999 | 0.105507 | 10.24192 |
| GO:0070482~response to oxygen levels                          | 11 | 0.177563 | 0.006298 | 2.78093  | 1        | 0.106924 | 10.45648 |
| GO:0048514~blood vessel morphogenesis                         | 14 | 0.225989 | 0.006492 | 2.365168 | 1        | 0.109241 | 10.76149 |
| GO:0044087~regulation of cellular component biogenesis        | 11 | 0.177563 | 0.006612 | 2.761346 | 1        | 0.110346 | 10.94933 |
| GO:0006112~energy reserve metabolic process                   | 6  | 0.096852 | 0.006719 | 4.973925 | 1        | 0.111243 | 11.11775 |
| GO:0006930~substrate-bound cell migration, cell extension     | 3  | 0.048426 | 0.007385 | 21.38788 | 1        | 0.120749 | 12.15346 |
| GO:0046165~alcohol biosynthetic process                       | 6  | 0.096852 | 0.00741  | 4.860882 | 1        | 0.120295 | 12.19304 |
| GO:0048545~response to steroid hormone stimulus               | 13 | 0.209847 | 0.00782  | 2.413563 | 1        | 0.125659 | 12.82493 |
| GO:0006413~translational initiation                           | 6  | 0.096852 | 0.00815  | 4.752862 | 1        | 0.129716 | 13.32949 |
| GO:0048641~regulation of skeletal muscle tissue development   | 5  | 0.08071  | 0.008244 | 6.145942 | 1        | 0.130229 | 13.47356 |
| GO:0030199~collagen fibril organization                       | 5  | 0.08071  | 0.008244 | 6.145942 | 1        | 0.130229 | 13.47356 |
| GO:0009266~response to temperature stimulus                   | 8  | 0.129136 | 0.008539 | 3.435804 | 1        | 0.133673 | 13.92246 |
| GO:0051235~maintenance of location                            | 7  | 0.112994 | 0.008836 | 3.898832 | 1        | 0.137078 | 14.3716  |
| GO:0006941~striated muscle contraction                        | 6  | 0.096852 | 0.008939 | 4.649539 | 1        | 0.137648 | 14.52694 |
| GO:0043462~regulation of ATPase activity                      | 4  | 0.064568 | 0.009285 | 8.911616 | 1        | 0.141663 | 15.04703 |
| GO:0048646~anatomical structure formation involved in morpl   | 19 | 0.306699 | 0.01033  | 1.924099 | 1        | 0.155356 | 16.59969 |
| GO:0014866~skeletal myofibril assembly                        | 3  | 0.048426 | 0.010873 | 17.82323 | 1        | 0.161825 | 17.39672 |
| GO:0034101~erythrocyte homeostasis                            | 6  | 0.096852 | 0.011619 | 4.364873 | 1        | 0.170889 | 18.47912 |
| GO:0051153~regulation of striated muscle cell differentiation | 5  | 0.08071  | 0.01169  | 5.56976  | 1        | 0.170763 | 18.58111 |
| GO:0007160~cell-matrix adhesion                               | 8  | 0.129136 | 0.012302 | 3.204177 | 1        | 0.177798 | 19.45859 |
| GO:0032956~regulation of actin cytoskeleton organization      | 8  | 0.129136 | 0.012302 | 3.204177 | 1        | 0.177798 | 19.45859 |
| GO:0016202~regulation of striated muscle tissue development   | 6  | 0.096852 | 0.012622 | 4.277576 | 1        | 0.180876 | 19.91285 |
| GO:0010035~response to inorganic substance                    | 13 | 0.209847 | 0.012742 | 2.260508 | 1        | 0.181326 | 20.0829  |
| GO:0030593~neutrophil chemotaxis                              | 4  | 0.064568 | 0.012982 | 7.921437 | 1        | 0.18331  | 20.42201 |
| GO:0006939~smooth muscle contraction                          | 5  | 0.08071  | 0.013015 | 5.400979 | 1        | 0.182632 | 20.46899 |
| GO:0008361~regulation of cell size                            | 13 | 0.209847 | 0.013195 | 2.249534 | 1        | 0.183819 | 20.72214 |
| GO:0048634~regulation of muscle development                   | 6  | 0.096852 | 0.013682 | 4.193702 | 1        | 0.188823 | 21.40219 |

|                                                               |    |          |          |          |   |          |          |
|---------------------------------------------------------------|----|----------|----------|----------|---|----------|----------|
| GO:0008652~cellular amino acid biosynthetic process           | 6  | 0.096852 | 0.013682 | 4.193702 | 1 | 0.188823 | 21.40219 |
| GO:0040007~growth                                             | 12 | 0.193705 | 0.014035 | 2.337473 | 1 | 0.192095 | 21.89321 |
| GO:0032970~regulation of actin filament-based process         | 8  | 0.129136 | 0.014576 | 3.099693 | 1 | 0.197608 | 22.63929 |
| GO:0046653~tetrahydrofolate metabolic process                 | 3  | 0.048426 | 0.014942 | 15.27706 | 1 | 0.200904 | 23.14035 |
| GO:0005977~glycogen metabolic process                         | 5  | 0.08071  | 0.015944 | 5.092352 | 1 | 0.211718 | 24.49555 |
| GO:0030154~cell differentiation                               | 61 | 0.984665 | 0.017035 | 1.328304 | 1 | 0.223289 | 25.94463 |
| GO:0051241~negative regulation of multicellular organismal pr | 11 | 0.177563 | 0.017087 | 2.390921 | 1 | 0.222647 | 26.01309 |
| GO:0002685~regulation of leukocyte migration                  | 4  | 0.064568 | 0.017405 | 7.129293 | 1 | 0.22507  | 26.43111 |
| GO:0044042~glucan metabolic process                           | 5  | 0.08071  | 0.017552 | 4.950898 | 1 | 0.225503 | 26.62267 |
| GO:0006073~cellular glucan metabolic process                  | 5  | 0.08071  | 0.017552 | 4.950898 | 1 | 0.225503 | 26.62267 |
| GO:0051592~response to calcium ion                            | 6  | 0.096852 | 0.018516 | 3.888705 | 1 | 0.235119 | 27.87136 |
| GO:0030595~leukocyte chemotaxis                               | 5  | 0.08071  | 0.019256 | 4.81709  | 1 | 0.242051 | 28.81692 |
| GO:0006563~L-serine metabolic process                         | 3  | 0.048426 | 0.019558 | 13.36742 | 1 | 0.24406  | 29.19837 |
| GO:0051017~actin filament bundle formation                    | 4  | 0.064568 | 0.019893 | 6.789803 | 1 | 0.246408 | 29.62059 |
| GO:0031589~cell-substrate adhesion                            | 8  | 0.129136 | 0.019996 | 2.909915 | 1 | 0.246224 | 29.74969 |
| GO:0009991~response to extracellular stimulus                 | 13 | 0.209847 | 0.021015 | 2.106382 | 1 | 0.255781 | 31.01504 |
| GO:0048738~cardiac muscle tissue development                  | 6  | 0.096852 | 0.021307 | 3.752259 | 1 | 0.257534 | 31.37418 |
| GO:0060326~cell chemotaxis                                    | 5  | 0.08071  | 0.022964 | 4.57006  | 1 | 0.27334  | 33.37728 |
| GO:0001525~angiogenesis                                       | 10 | 0.161421 | 0.023375 | 2.408545 | 1 | 0.276143 | 33.86598 |
| GO:0007596~blood coagulation                                  | 8  | 0.129136 | 0.024307 | 2.795801 | 1 | 0.284111 | 34.96088 |
| GO:0050817~coagulation                                        | 8  | 0.129136 | 0.024307 | 2.795801 | 1 | 0.284111 | 34.96088 |
| GO:0014829~vascular smooth muscle contraction                 | 3  | 0.048426 | 0.024685 | 11.88215 | 1 | 0.286454 | 35.40003 |
| GO:0032781~positive regulation of ATPase activity             | 3  | 0.048426 | 0.024685 | 11.88215 | 1 | 0.286454 | 35.40003 |
| GO:0051094~positive regulation of developmental process       | 15 | 0.242131 | 0.024783 | 1.92337  | 1 | 0.286015 | 35.51319 |
| GO:0006953~acute-phase response                               | 5  | 0.08071  | 0.024969 | 4.455808 | 1 | 0.286439 | 35.72754 |
| GO:0016525~negative regulation of angiogenesis                | 4  | 0.064568 | 0.025426 | 6.199385 | 1 | 0.289485 | 36.25175 |
| GO:0015807~L-amino acid transport                             | 4  | 0.064568 | 0.025426 | 6.199385 | 1 | 0.289485 | 36.25175 |
| GO:0009653~anatomical structure morphogenesis                 | 46 | 0.742534 | 0.025438 | 1.369872 | 1 | 0.288214 | 36.26582 |
| GO:0008064~regulation of actin polymerization or depolymeriz  | 6  | 0.096852 | 0.027678 | 3.50621  | 1 | 0.308044 | 38.77851 |
| GO:0043627~response to estrogen stimulus                      | 8  | 0.129136 | 0.027932 | 2.715921 | 1 | 0.308968 | 39.05824 |
| GO:0050873~brown fat cell differentiation                     | 4  | 0.064568 | 0.02847  | 5.941077 | 1 | 0.312482 | 39.6446  |
| GO:0060284~regulation of cell development                     | 12 | 0.193705 | 0.029358 | 2.086622 | 1 | 0.319119 | 40.60154 |
| GO:0051789~response to protein stimulus                       | 8  | 0.129136 | 0.030543 | 2.665156 | 1 | 0.328275 | 41.85688 |
| GO:0030832~regulation of actin filament length                | 6  | 0.096852 | 0.031271 | 3.394901 | 1 | 0.33322  | 42.61577 |

|                                                                 |     |          |          |          |   |          |          |
|-----------------------------------------------------------------|-----|----------|----------|----------|---|----------|----------|
| GO:0010033~response to organic substance                        | 30  | 0.484262 | 0.031583 | 1.483209 | 1 | 0.334456 | 42.93764 |
| GO:0006094~gluconeogenesis                                      | 4   | 0.064568 | 0.031698 | 5.703434 | 1 | 0.333977 | 43.05652 |
| GO:0007599~hemostasis                                           | 8   | 0.129136 | 0.031908 | 2.640479 | 1 | 0.334312 | 43.27133 |
| GO:0032501~multicellular organismal process                     | 138 | 2.227603 | 0.032682 | 1.149349 | 1 | 0.339476 | 44.05926 |
| GO:0042127~regulation of cell proliferation                     | 32  | 0.516546 | 0.034094 | 1.449412 | 1 | 0.349901 | 45.47005 |
| GO:0008544~epidermis development                                | 11  | 0.177563 | 0.034356 | 2.131039 | 1 | 0.350577 | 45.72754 |
| GO:0001501~skeletal system development                          | 16  | 0.258273 | 0.034851 | 1.78791  | 1 | 0.35317  | 46.21191 |
| GO:0048869~cellular developmental process                       | 61  | 0.984665 | 0.035007 | 1.274581 | 1 | 0.35296  | 46.36408 |
| GO:0006917~induction of apoptosis                               | 16  | 0.258273 | 0.035334 | 1.782323 | 1 | 0.354139 | 46.68069 |
| GO:0055114~oxidation reduction                                  | 27  | 0.435835 | 0.035787 | 1.506189 | 1 | 0.356321 | 47.11624 |
| GO:0009070~serine family amino acid biosynthetic process        | 3   | 0.048426 | 0.036351 | 9.721763 | 1 | 0.359368 | 47.65468 |
| GO:0045661~regulation of myoblast differentiation               | 3   | 0.048426 | 0.036351 | 9.721763 | 1 | 0.359368 | 47.65468 |
| GO:0005978~glycogen biosynthetic process                        | 3   | 0.048426 | 0.036351 | 9.721763 | 1 | 0.359368 | 47.65468 |
| GO:0009250~glucan biosynthetic process                          | 3   | 0.048426 | 0.036351 | 9.721763 | 1 | 0.359368 | 47.65468 |
| GO:0043433~negative regulation of transcription factor activity | 5   | 0.08071  | 0.036545 | 3.960718 | 1 | 0.359436 | 47.83889 |
| GO:0012502~induction of programmed cell death                   | 16  | 0.258273 | 0.036587 | 1.776771 | 1 | 0.358297 | 47.87875 |
| GO:0051493~regulation of cytoskeleton organization              | 9   | 0.145278 | 0.037332 | 2.358957 | 1 | 0.362701 | 48.579   |
| GO:0060415~muscle tissue morphogenesis                          | 4   | 0.064568 | 0.038703 | 5.280958 | 1 | 0.371869 | 49.84416 |
| GO:0055008~cardiac muscle tissue morphogenesis                  | 4   | 0.064568 | 0.038703 | 5.280958 | 1 | 0.371869 | 49.84416 |
| GO:0006519~cellular amino acid and derivative metabolic proc    | 17  | 0.274415 | 0.039148 | 1.721562 | 1 | 0.373792 | 50.24852 |
| GO:0051222~positive regulation of protein transport             | 6   | 0.096852 | 0.039301 | 3.192221 | 1 | 0.373474 | 50.38676 |
| GO:0051223~regulation of protein transport                      | 8   | 0.129136 | 0.040955 | 2.501506 | 1 | 0.384433 | 51.8592  |
| GO:0010811~positive regulation of cell-substrate adhesion       | 4   | 0.064568 | 0.042476 | 5.092352 | 1 | 0.394139 | 53.17615 |
| GO:0031099~regeneration                                         | 6   | 0.096852 | 0.043745 | 3.099693 | 1 | 0.401812 | 54.24955 |
| GO:0030308~negative regulation of cell growth                   | 7   | 0.112994 | 0.044155 | 2.712231 | 1 | 0.403222 | 54.59133 |
| GO:0050878~regulation of body fluid levels                      | 9   | 0.145278 | 0.044639 | 2.275306 | 1 | 0.405135 | 54.99113 |
| GO:0045185~maintenance of protein location                      | 5   | 0.08071  | 0.044748 | 3.713173 | 1 | 0.404393 | 55.08132 |
| GO:0051179~localization                                         | 99  | 1.598063 | 0.044894 | 1.179085 | 1 | 0.403911 | 55.20105 |
| GO:0050921~positive regulation of chemotaxis                    | 4   | 0.064568 | 0.046426 | 4.916754 | 1 | 0.413065 | 56.44033 |
| GO:0044106~cellular amine metabolic process                     | 15  | 0.242131 | 0.047803 | 1.753105 | 1 | 0.420963 | 57.52711 |
| GO:0006986~response to unfolded protein                         | 6   | 0.096852 | 0.048479 | 3.012377 | 1 | 0.423999 | 58.05125 |

## Cellular Component (CC)

| Term | Count | % | PValue | Fold Enri | Bonferro | Benjamir | FDR |
|------|-------|---|--------|-----------|----------|----------|-----|
|------|-------|---|--------|-----------|----------|----------|-----|

|                                                         |     |          |          |          |          |          |          |
|---------------------------------------------------------|-----|----------|----------|----------|----------|----------|----------|
| GO:0022626~cytosolic ribosome                           | 25  | 0.403551 | 6.79E-19 | 11.36545 | 2.34E-16 | 2.34E-16 | 9.26E-16 |
| GO:0044445~cytosolic part                               | 30  | 0.484262 | 7.20E-17 | 7.267909 | 3.82E-14 | 1.91E-14 | 1.55E-13 |
| GO:0015629~actin cytoskeleton                           | 38  | 0.613398 | 2.67E-16 | 5.201914 | 7.64E-14 | 2.54E-14 | 3.00E-13 |
| GO:0033279~ribosomal subunit                            | 27  | 0.435835 | 7.12E-16 | 7.767578 | 2.29E-13 | 5.73E-14 | 9.10E-13 |
| GO:0044449~contractile fiber part                       | 25  | 0.403551 | 3.12E-15 | 8.146919 | 1.07E-12 | 2.14E-13 | 4.24E-12 |
| GO:0043292~contractile fiber                            | 25  | 0.403551 | 1.56E-14 | 7.60828  | 5.39E-12 | 8.98E-13 | 2.13E-11 |
| GO:0005840~ribosome                                     | 30  | 0.484262 | 9.42E-13 | 5.138243 | 3.24E-10 | 4.63E-11 | 1.28E-09 |
| GO:0022627~cytosolic small ribosomal subunit            | 14  | 0.225989 | 2.19E-11 | 12.88843 | 7.54E-09 | 9.42E-10 | 2.99E-08 |
| GO:0030017~sarcomere                                    | 19  | 0.306699 | 1.22E-10 | 7.139361 | 4.20E-08 | 4.67E-09 | 1.67E-07 |
| GO:0016459~myosin complex                               | 16  | 0.258273 | 1.47E-10 | 9.064387 | 5.05E-08 | 5.05E-09 | 2.00E-07 |
| GO:0030016~myofibril                                    | 19  | 0.306699 | 1.02E-09 | 6.30322  | 3.52E-07 | 3.20E-08 | 1.40E-06 |
| GO:0005737~cytoplasm                                    | 261 | 4.213075 | 1.03E-09 | 1.313169 | 3.56E-07 | 2.97E-08 | 1.41E-06 |
| GO:0015935~small ribosomal subunit                      | 14  | 0.225989 | 1.08E-08 | 8.183128 | 3.72E-06 | 2.86E-07 | 1.48E-05 |
| GO:0005829~cytosol                                      | 72  | 1.162228 | 2.13E-08 | 1.993484 | 7.32E-06 | 5.23E-07 | 2.90E-05 |
| GO:0005856~cytoskeleton                                 | 73  | 1.17837  | 4.35E-08 | 1.94653  | 1.50E-05 | 9.98E-07 | 5.94E-05 |
| GO:0022625~cytosolic large ribosomal subunit            | 11  | 0.177563 | 4.60E-08 | 10.6596  | 1.58E-05 | 9.90E-07 | 6.28E-05 |
| GO:0043232~intracellular non-membrane-bounded organelle | 114 | 1.840194 | 8.08E-08 | 1.617082 | 2.78E-05 | 1.63E-06 | 1.10E-04 |
| GO:0043228~non-membrane-bounded organelle               | 114 | 1.840194 | 8.08E-08 | 1.617082 | 2.78E-05 | 1.63E-06 | 1.10E-04 |
| GO:0044444~cytoplasmic part                             | 184 | 2.970137 | 1.37E-07 | 1.384194 | 4.71E-05 | 2.62E-06 | 1.87E-04 |
| GO:0015934~large ribosomal subunit                      | 13  | 0.209847 | 2.09E-07 | 7.14497  | 7.19E-05 | 3.78E-06 | 2.85E-04 |
| GO:0042641~actomyosin                                   | 9   | 0.145278 | 3.84E-07 | 12.27469 | 1.32E-04 | 6.61E-06 | 5.24E-04 |
| GO:0005859~muscle myosin complex                        | 8   | 0.129136 | 5.83E-07 | 14.72963 | 2.01E-04 | 9.55E-06 | 7.95E-04 |
| GO:0016460~myosin II complex                            | 8   | 0.129136 | 1.22E-06 | 13.39057 | 4.21E-04 | 1.91E-05 | 0.00167  |
| GO:0044421~extracellular region part                    | 53  | 0.855529 | 1.37E-06 | 2.032996 | 4.70E-04 | 2.04E-05 | 0.001862 |
| GO:0001725~stress fiber                                 | 8   | 0.129136 | 2.37E-06 | 12.27469 | 8.15E-04 | 3.40E-05 | 0.003233 |
| GO:0032432~actin filament bundle                        | 8   | 0.129136 | 4.30E-06 | 11.33048 | 0.001477 | 5.91E-05 | 0.005862 |
| GO:0031674~I band                                       | 10  | 0.161421 | 1.52E-05 | 6.695286 | 0.005227 | 2.02E-04 | 0.020779 |
| GO:0005576~extracellular region                         | 86  | 1.388216 | 1.62E-05 | 1.575557 | 0.005547 | 2.06E-04 | 0.022056 |
| GO:0031012~extracellular matrix                         | 25  | 0.403551 | 2.48E-05 | 2.668411 | 0.008503 | 3.05E-04 | 0.033856 |
| GO:0030529~ribonucleoprotein complex                    | 32  | 0.516546 | 2.99E-05 | 2.288098 | 0.010221 | 3.54E-04 | 0.040733 |
| GO:0005581~collagen                                     | 8   | 0.129136 | 3.56E-05 | 8.416931 | 0.012166 | 4.08E-04 | 0.04853  |
| GO:0000267~cell fraction                                | 53  | 0.855529 | 3.99E-05 | 1.802102 | 0.013648 | 4.43E-04 | 0.05448  |
| GO:0032991~macromolecular complex                       | 120 | 1.937046 | 4.94E-05 | 1.400599 | 0.016854 | 5.31E-04 | 0.067382 |
| GO:0030485~smooth muscle contractile fiber              | 4   | 0.064568 | 7.74E-05 | 36.82407 | 0.026281 | 8.07E-04 | 0.105559 |

|                                               |     |          |          |          |          |          |          |
|-----------------------------------------------|-----|----------|----------|----------|----------|----------|----------|
| GO:0005884~actin filament                     | 8   | 0.129136 | 1.03E-04 | 7.185185 | 0.034949 | 0.001046 | 0.140975 |
| GO:0008305~integrin complex                   | 7   | 0.112994 | 1.07E-04 | 8.88857  | 0.036092 | 0.00105  | 0.145666 |
| GO:0000015~phosphopyruvate hydratase complex  | 4   | 0.064568 | 1.90E-04 | 29.45926 | 0.063161 | 0.001811 | 0.258396 |
| GO:0030055~cell-substrate junction            | 12  | 0.193705 | 2.29E-04 | 3.945437 | 0.075656 | 0.002124 | 0.31149  |
| GO:0070161~anchoring junction                 | 15  | 0.242131 | 2.51E-04 | 3.211402 | 0.08272  | 0.00227  | 0.341813 |
| GO:0005912~adherens junction                  | 14  | 0.225989 | 3.10E-04 | 3.326045 | 0.101015 | 0.002727 | 0.421399 |
| GO:0005587~collagen type IV                   | 4   | 0.064568 | 3.72E-04 | 24.54938 | 0.120035 | 0.003192 | 0.505808 |
| GO:0016323~basolateral plasma membrane        | 16  | 0.258273 | 4.34E-04 | 2.90239  | 0.138836 | 0.003639 | 0.590986 |
| GO:0005578~proteinaceous extracellular matrix | 21  | 0.338983 | 4.77E-04 | 2.41658  | 0.151327 | 0.003899 | 0.648568 |
| GO:0005924~cell-substrate adherens junction   | 11  | 0.177563 | 6.02E-04 | 3.821366 | 0.187208 | 0.004809 | 0.818617 |
| GO:0030935~sheet-forming collagen             | 4   | 0.064568 | 6.37E-04 | 21.04233 | 0.196926 | 0.004972 | 0.865917 |
| GO:0044430~cytoskeletal part                  | 44  | 0.71025  | 6.93E-04 | 1.701953 | 0.212123 | 0.005284 | 0.940992 |
| GO:0005625~soluble fraction                   | 20  | 0.322841 | 9.31E-04 | 2.352976 | 0.274081 | 0.006939 | 1.262209 |
| GO:0043235~receptor complex                   | 11  | 0.177563 | 0.001215 | 3.491938 | 0.341723 | 0.008857 | 1.644459 |
| GO:0044420~extracellular matrix part          | 11  | 0.177563 | 0.001297 | 3.462092 | 0.360102 | 0.009258 | 1.754841 |
| GO:0005925~focal adhesion                     | 10  | 0.161421 | 0.001794 | 3.610203 | 0.460727 | 0.012524 | 2.41914  |
| GO:0005792~microsome                          | 16  | 0.258273 | 0.002086 | 2.486013 | 0.512459 | 0.014265 | 2.808604 |
| GO:0005626~insoluble fraction                 | 38  | 0.613398 | 0.002462 | 1.667836 | 0.571697 | 0.016489 | 3.306617 |
| GO:0042598~vesicular fraction                 | 16  | 0.258273 | 0.002759 | 2.414693 | 0.613352 | 0.018108 | 3.698147 |
| GO:0005615~extracellular space                | 32  | 0.516546 | 0.003722 | 1.720249 | 0.722712 | 0.023911 | 4.959447 |
| GO:0005624~membrane fraction                  | 36  | 0.581114 | 0.004352 | 1.638649 | 0.776926 | 0.0274   | 5.775857 |
| GO:0044446~intracellular organelle part       | 139 | 2.243745 | 0.006096 | 1.21149  | 0.87798  | 0.037525 | 8.003445 |
| GO:0005938~cell cortex                        | 11  | 0.177563 | 0.00646  | 2.774417 | 0.892396 | 0.039027 | 8.460976 |
| GO:0044422~organelle part                     | 139 | 2.243745 | 0.007611 | 1.204081 | 0.927791 | 0.045062 | 9.89757  |
| GO:0030018~Z disc                             | 6   | 0.096852 | 0.007846 | 4.80314  | 0.933444 | 0.045645 | 10.1884  |
| GO:0031672~A band                             | 4   | 0.064568 | 0.008505 | 9.206019 | 0.947034 | 0.048579 | 10.99814 |
| GO:0044459~plasma membrane part               | 77  | 1.242938 | 0.014712 | 1.287087 | 0.993894 | 0.081464 | 18.30541 |
| GO:0005604~basement membrane                  | 7   | 0.112994 | 0.019063 | 3.304725 | 0.998668 | 0.102856 | 23.09168 |
| GO:0044424~intracellular part                 | 309 | 4.987893 | 0.019807 | 1.071032 | 0.998974 | 0.105061 | 23.88399 |
| GO:0030054~cell junction                      | 23  | 0.371267 | 0.025379 | 1.635046 | 0.999856 | 0.130961 | 29.57931 |
| GO:0005886~plasma membrane                    | 120 | 1.937046 | 0.033297 | 1.169947 | 0.999991 | 0.166415 | 36.99539 |
| GO:0043234~protein complex                    | 85  | 1.372074 | 0.040469 | 1.209446 | 0.999999 | 0.196381 | 43.08145 |
| GO:0030863~cortical cytoskeleton              | 5   | 0.08071  | 0.043257 | 3.757559 |          | 0.205849 | 45.29615 |
| GO:0031410~cytoplasmic vesicle                | 26  | 0.419693 | 0.045466 | 1.491318 |          | 0.212514 | 46.99423 |

GO:0042175~nuclear envelope-endoplasmic reticulum network 14 0.225989 0.045947 1.815271 1 0.211756 47.35767

## Molecular Function (MF)

| Term                                                        | Count | %        | PValue   | Fold Enri | Bonferro | Benjamir | FDR      |
|-------------------------------------------------------------|-------|----------|----------|-----------|----------|----------|----------|
| GO:0005198~structural molecule activity                     | 66    | 1.065375 | 1.87E-20 | 3.753335  | 1.18E-17 | 1.18E-17 | 2.78E-17 |
| GO:0003735~structural constituent of ribosome               | 30    | 0.484262 | 2.16E-15 | 6.43835   | 1.34E-12 | 6.68E-13 | 3.14E-12 |
| GO:0003779~actin binding                                    | 37    | 0.597256 | 1.34E-12 | 4.092105  | 8.45E-10 | 2.82E-10 | 1.99E-09 |
| GO:0008092~cytoskeletal protein binding                     | 46    | 0.742534 | 3.64E-12 | 3.290712  | 2.30E-09 | 5.75E-10 | 5.41E-09 |
| GO:0005515~protein binding                                  | 291   | 4.697337 | 5.66E-11 | 1.286723  | 3.58E-08 | 7.16E-09 | 8.42E-08 |
| GO:0008307~structural constituent of muscle                 | 12    | 0.193705 | 1.26E-08 | 10.30136  | 7.99E-06 | 1.33E-06 | 1.88E-05 |
| GO:0005488~binding                                          | 380   | 6.133979 | 4.30E-06 | 1.093353  | 0.002716 | 3.88E-04 | 0.006392 |
| GO:0019838~growth factor binding                            | 13    | 0.209847 | 3.29E-05 | 4.463923  | 0.020595 | 0.002598 | 0.048898 |
| GO:0030898~actin-dependent ATPase activity                  | 5     | 0.08071  | 3.70E-05 | 22.53423  | 0.023169 | 0.002601 | 0.055079 |
| GO:0003774~motor activity                                   | 15    | 0.242131 | 3.97E-05 | 3.808602  | 0.024832 | 0.002511 | 0.059082 |
| GO:0005520~insulin-like growth factor binding               | 7     | 0.112994 | 4.90E-05 | 10.09533  | 0.030569 | 0.002818 | 0.07294  |
| GO:0004634~phosphopyruvate hydratase activity               | 4     | 0.064568 | 2.02E-04 | 28.84381  | 0.119924 | 0.010589 | 0.299794 |
| GO:0004459~L-lactate dehydrogenase activity                 | 4     | 0.064568 | 2.02E-04 | 28.84381  | 0.119924 | 0.010589 | 0.299794 |
| GO:0015175~neutral amino acid transmembrane transporter a   | 6     | 0.096852 | 2.23E-04 | 10.30136  | 0.131859 | 0.010818 | 0.331786 |
| GO:0004457~lactate dehydrogenase activity                   | 4     | 0.064568 | 3.95E-04 | 24.03651  | 0.221407 | 0.017717 | 0.586477 |
| GO:0005201~extracellular matrix structural constituent      | 10    | 0.161421 | 6.10E-04 | 4.192414  | 0.320579 | 0.025438 | 0.904314 |
| GO:0046943~carboxylic acid transmembrane transporter activi | 10    | 0.161421 | 9.97E-04 | 3.918996  | 0.468251 | 0.038705 | 1.473452 |
| GO:0005342~organic acid transmembrane transporter activity  | 10    | 0.161421 | 0.001078 | 3.876856  | 0.494683 | 0.039356 | 1.59145  |
| GO:0015171~amino acid transmembrane transporter activity    | 8     | 0.129136 | 0.001165 | 4.888781  | 0.521886 | 0.040166 | 1.719354 |
| GO:0005516~calmodulin binding                               | 12    | 0.193705 | 0.001773 | 3.090408  | 0.674723 | 0.057396 | 2.605044 |
| GO:0050501~hyaluronan synthase activity                     | 3     | 0.048426 | 0.002249 | 36.05476  | 0.759607 | 0.068793 | 3.294811 |
| GO:0017022~myosin binding                                   | 5     | 0.08071  | 0.002846 | 8.194264  | 0.835327 | 0.082309 | 4.150858 |
| GO:0051015~actin filament binding                           | 7     | 0.112994 | 0.003312 | 4.76195   | 0.877545 | 0.091041 | 4.815843 |
| GO:0005200~structural constituent of cytoskeleton           | 8     | 0.129136 | 0.004317 | 3.897812  | 0.935319 | 0.112242 | 6.233079 |
| GO:0005275~amine transmembrane transporter activity         | 8     | 0.129136 | 0.004317 | 3.897812  | 0.935319 | 0.112242 | 6.233079 |
| GO:0005509~calcium ion binding                              | 40    | 0.645682 | 0.005279 | 1.569304  | 0.964933 | 0.130297 | 7.572616 |
| GO:0005178~integrin binding                                 | 7     | 0.112994 | 0.00566  | 4.277684  | 0.972486 | 0.133872 | 8.098041 |
| GO:0022804~active transmembrane transporter activity        | 20    | 0.322841 | 0.006058 | 1.986488  | 0.97864  | 0.137511 | 8.643315 |
| GO:0008201~heparin binding                                  | 9     | 0.145278 | 0.007759 | 3.150416  | 0.992777 | 0.166908 | 10.94199 |
| GO:0000146~microfilament motor activity                     | 4     | 0.064568 | 0.010716 | 8.483473  | 0.998908 | 0.216168 | 14.80983 |

|                                                              |    |          |          |          |          |          |          |
|--------------------------------------------------------------|----|----------|----------|----------|----------|----------|----------|
| GO:0008194~UDP-glycosyltransferase activity                  | 9  | 0.145278 | 0.011925 | 2.923359 | 0.999497 | 0.230381 | 16.34599 |
| GO:0015370~solute:sodium symporter activity                  | 6  | 0.096852 | 0.01417  | 4.160165 | 0.999881 | 0.26001  | 19.12908 |
| GO:0001968~fibronectin binding                               | 3  | 0.048426 | 0.014627 | 15.45204 | 0.999911 | 0.259836 | 19.68568 |
| GO:0005539~glycosaminoglycan binding                         | 10 | 0.161421 | 0.015884 | 2.57534  | 0.99996  | 0.271466 | 21.19589 |
| GO:0003785~actin monomer binding                             | 3  | 0.048426 | 0.019149 | 13.52054 | 0.999995 | 0.309869 | 24.99762 |
| GO:0030246~carbohydrate binding                              | 18 | 0.290557 | 0.019852 | 1.833293 | 0.999997 | 0.31155  | 25.79331 |
| GO:0032403~protein complex binding                           | 12 | 0.193705 | 0.020635 | 2.207434 | 0.999998 | 0.314161 | 26.67107 |
| GO:0016758~transferase activity, transferring hexosyl groups | 11 | 0.177563 | 0.023077 | 2.279324 | 1        | 0.336699 | 29.3442  |
| GO:0030247~polysaccharide binding                            | 10 | 0.161421 | 0.027527 | 2.341218 | 1        | 0.379692 | 33.98409 |
| GO:0001871~pattern binding                                   | 10 | 0.161421 | 0.027527 | 2.341218 | 1        | 0.379692 | 33.98409 |
| GO:0046983~protein dimerization activity                     | 24 | 0.387409 | 0.028306 | 1.596521 | 1        | 0.380174 | 34.76615 |
| GO:0015291~secondary active transmembrane transporter act    | 12 | 0.193705 | 0.029312 | 2.090131 | 1        | 0.382989 | 35.76398 |
| GO:0042805~actinin binding                                   | 3  | 0.048426 | 0.029672 | 10.81643 | 1        | 0.379151 | 36.11758 |
| GO:0005343~organic acid:sodium symporter activity            | 4  | 0.064568 | 0.03081  | 5.768762 | 1        | 0.383172 | 37.22357 |
| GO:0016836~hydro-lyase activity                              | 5  | 0.08071  | 0.032857 | 4.097132 | 1        | 0.395599 | 39.16695 |
| GO:0015293~symporter activity                                | 9  | 0.145278 | 0.036675 | 2.368561 | 1        | 0.42307  | 42.64339 |
| GO:0016706~oxidoreductase activity, acting on paired donors, | 4  | 0.064568 | 0.041313 | 5.15068  | 1        | 0.454997 | 46.61728 |
| GO:0005524~ATP binding                                       | 53 | 0.855529 | 0.041368 | 1.293773 | 1        | 0.448048 | 46.66344 |
| GO:0016491~oxidoreductase activity                           | 28 | 0.451977 | 0.044153 | 1.465215 | 1        | 0.462808 | 48.92219 |
| GO:0015294~solute:cation symporter activity                  | 7  | 0.112994 | 0.04811  | 2.656667 | 1        | 0.485244 | 51.97995 |
| GO:0003714~transcription corepressor activity                | 9  | 0.145278 | 0.048503 | 2.237882 | 1        | 0.480905 | 52.27385 |
| GO:0005523~tropomyosin binding                               | 3  | 0.048426 | 0.048707 | 8.32033  | 1        | 0.475369 | 52.42604 |



## Supplemental Table V: GO Terms for Genes Upregulated with *SENCR* Knockdown

### Biological Process (BP)

| Term                                                   | Count | %        | p value  | Fold Enri | Bonferro | Benjamir | FDR      |
|--------------------------------------------------------|-------|----------|----------|-----------|----------|----------|----------|
| GO:0042127~regulation of cell proliferation            | 38    | 1.398087 | 6.41E-10 | 3.170166  | 1.23E-06 | 1.23E-06 | 1.10E-06 |
| GO:0008284~positive regulation of cell proliferation   | 26    | 0.956586 | 3.94E-09 | 4.123312  | 7.55E-06 | 3.78E-06 | 6.74E-06 |
| GO:0009611~response to wounding                        | 24    | 0.883002 | 5.76E-06 | 2.973093  | 0.010988 | 0.003676 | 0.00986  |
| GO:0051270~regulation of cell motion                   | 14    | 0.515085 | 7.73E-06 | 4.762598  | 0.014707 | 0.003697 | 0.013222 |
| GO:0006950~response to stress                          | 49    | 1.802796 | 9.93E-06 | 1.909279  | 0.018861 | 0.003801 | 0.016992 |
| GO:0001763~morphogenesis of a branching structure      | 9     | 0.331126 | 1.56E-05 | 7.985167  | 0.029522 | 0.004982 | 0.02674  |
| GO:0040017~positive regulation of locomotion           | 10    | 0.367918 | 1.75E-05 | 6.699573  | 0.033005 | 0.004783 | 0.029947 |
| GO:0009605~response to external stimulus               | 32    | 1.177336 | 2.01E-05 | 2.298672  | 0.037715 | 0.004794 | 0.034304 |
| GO:0040012~regulation of locomotion                    | 13    | 0.478293 | 3.65E-05 | 4.445446  | 0.06766  | 0.007754 | 0.062503 |
| GO:0032502~developmental process                       | 74    | 2.72259  | 4.53E-05 | 1.54337   | 0.083109 | 0.008639 | 0.077404 |
| GO:0030334~regulation of cell migration                | 12    | 0.441501 | 5.35E-05 | 4.661951  | 0.097526 | 0.009285 | 0.091536 |
| GO:0030335~positive regulation of cell migration       | 9     | 0.331126 | 6.03E-05 | 6.639352  | 0.109195 | 0.00959  | 0.103139 |
| GO:0016477~cell migration                              | 15    | 0.551876 | 8.25E-05 | 3.568251  | 0.146343 | 0.012097 | 0.141108 |
| GO:0051272~positive regulation of cell motion          | 9     | 0.331126 | 1.20E-04 | 6.029616  | 0.204945 | 0.016248 | 0.204467 |
| GO:0007049~cell cycle                                  | 27    | 0.993377 | 1.21E-04 | 2.284416  | 0.207406 | 0.015377 | 0.207228 |
| GO:0032101~regulation of response to external stimulus | 11    | 0.404709 | 1.56E-04 | 4.542226  | 0.257862 | 0.018466 | 0.265791 |
| GO:0007275~multicellular organismal development        | 67    | 2.465048 | 1.57E-04 | 1.535406  | 0.259241 | 0.017497 | 0.267445 |
| GO:0048731~system development                          | 57    | 2.09713  | 2.03E-04 | 1.606172  | 0.321881 | 0.021348 | 0.346053 |
| GO:0042221~response to chemical stimulus               | 37    | 1.361295 | 2.08E-04 | 1.896382  | 0.329205 | 0.020796 | 0.35571  |
| GO:0048870~cell motility                               | 15    | 0.551876 | 2.50E-04 | 3.207939  | 0.380915 | 0.02369  | 0.427023 |
| GO:0051674~localization of cell                        | 15    | 0.551876 | 2.50E-04 | 3.207939  | 0.380915 | 0.02369  | 0.427023 |
| GO:0048856~anatomical structure development            | 60    | 2.207506 | 2.84E-04 | 1.558903  | 0.42025  | 0.025626 | 0.485341 |
| GO:0040011~locomotion                                  | 18    | 0.662252 | 3.11E-04 | 2.742006  | 0.44917  | 0.026742 | 0.530776 |
| GO:0006928~cell motion                                 | 19    | 0.699043 | 3.40E-04 | 2.626233  | 0.479017 | 0.027951 | 0.580215 |
| GO:0048754~branching morphogenesis of a tube           | 7     | 0.257542 | 4.44E-04 | 7.070626  | 0.573001 | 0.034836 | 0.756569 |
| GO:0009628~response to abiotic stimulus                | 16    | 0.588668 | 4.99E-04 | 2.854601  | 0.616235 | 0.037585 | 0.851072 |
| GO:0048518~positive regulation of biological process   | 50    | 1.839588 | 5.37E-04 | 1.614752  | 0.642657 | 0.038806 | 0.91417  |
| GO:0048522~positive regulation of cellular process     | 46    | 1.692421 | 7.62E-04 | 1.635175  | 0.767964 | 0.052668 | 1.295275 |
| GO:0050921~positive regulation of chemotaxis           | 5     | 0.183959 | 9.06E-04 | 11.31997  | 0.824047 | 0.060169 | 1.538689 |
| GO:0008283~cell proliferation                          | 17    | 0.62546  | 0.001018 | 2.559974  | 0.858101 | 0.065116 | 1.727523 |

|                                                               |    |          |          |          |          |          |          |
|---------------------------------------------------------------|----|----------|----------|----------|----------|----------|----------|
| GO:0050920~regulation of chemotaxis                           | 5  | 0.183959 | 0.001172 | 10.58965 | 0.894423 | 0.072205 | 1.986498 |
| GO:0060541~respiratory system development                     | 8  | 0.294334 | 0.001276 | 4.863394 | 0.913439 | 0.075898 | 2.160046 |
| GO:0001568~blood vessel development                           | 12 | 0.441501 | 0.001301 | 3.215795 | 0.917512 | 0.07501  | 2.202127 |
| GO:0006954~inflammatory response                              | 14 | 0.515085 | 0.001387 | 2.82825  | 0.930095 | 0.07746  | 2.346483 |
| GO:0048513~organ development                                  | 43 | 1.582046 | 0.001387 | 1.624396 | 0.930162 | 0.075296 | 2.347318 |
| GO:0051592~response to calcium ion                            | 6  | 0.220751 | 0.001436 | 7.162452 | 0.936396 | 0.075698 | 2.42877  |
| GO:0001944~vasculature development                            | 12 | 0.441501 | 0.001584 | 3.138923 | 0.952093 | 0.080939 | 2.675242 |
| GO:0022403~cell cycle phase                                   | 16 | 0.588668 | 0.001651 | 2.537423 | 0.957901 | 0.082052 | 2.787428 |
| GO:0006270~DNA replication initiation                         | 4  | 0.147167 | 0.001663 | 16.41395 | 0.958851 | 0.080534 | 2.807222 |
| GO:0048520~positive regulation of behavior                    | 5  | 0.183959 | 0.001667 | 9.655267 | 0.959202 | 0.078755 | 2.814661 |
| GO:0051128~regulation of cellular component organization      | 17 | 0.62546  | 0.001681 | 2.437006 | 0.960232 | 0.077453 | 2.836834 |
| GO:0001525~angiogenesis                                       | 9  | 0.331126 | 0.001881 | 3.992583 | 0.972917 | 0.084258 | 3.169385 |
| GO:0007167~enzyme linked receptor protein signaling pathway   | 14 | 0.515085 | 0.002194 | 2.687665 | 0.985166 | 0.095395 | 3.688163 |
| GO:0030501~positive regulation of bone mineralization         | 4  | 0.147167 | 0.00237  | 14.59018 | 0.989412 | 0.100366 | 3.977565 |
| GO:0007242~intracellular signaling cascade                    | 33 | 1.214128 | 0.00246  | 1.725033 | 0.991106 | 0.101769 | 4.126911 |
| GO:0006260~DNA replication                                    | 10 | 0.367918 | 0.002476 | 3.455569 | 0.991364 | 0.100212 | 4.152047 |
| GO:0042060~wound healing                                      | 10 | 0.367918 | 0.002558 | 3.437477 | 0.992632 | 0.101252 | 4.28779  |
| GO:0001894~tissue homeostasis                                 | 6  | 0.220751 | 0.002632 | 6.252935 | 0.993603 | 0.101912 | 4.408423 |
| GO:0030154~cell differentiation                               | 40 | 1.47167  | 0.002722 | 1.604296 | 0.994616 | 0.103125 | 4.555342 |
| GO:0050927~positive regulation of positive chemotaxis         | 4  | 0.147167 | 0.002783 | 13.82228 | 0.995213 | 0.103287 | 4.655528 |
| GO:0070169~positive regulation of biomineral formation        | 4  | 0.147167 | 0.002783 | 13.82228 | 0.995213 | 0.103287 | 4.655528 |
| GO:0050926~regulation of positive chemotaxis                  | 4  | 0.147167 | 0.002783 | 13.82228 | 0.995213 | 0.103287 | 4.655528 |
| GO:0032103~positive regulation of response to external stimul | 6  | 0.220751 | 0.00282  | 6.155233 | 0.995547 | 0.102627 | 4.716986 |
| GO:0032501~multicellular organismal process                   | 85 | 3.127299 | 0.003115 | 1.303912 | 0.997471 | 0.110639 | 5.196752 |
| GO:0010033~response to organic substance                      | 22 | 0.809419 | 0.003161 | 2.003367 | 0.997688 | 0.110173 | 5.272888 |
| GO:0022604~regulation of cell morphogenesis                   | 8  | 0.294334 | 0.003815 | 4.009515 | 0.999343 | 0.129132 | 6.330575 |
| GO:0030324~lung development                                   | 7  | 0.257542 | 0.003937 | 4.64233  | 0.999481 | 0.13069  | 6.526775 |
| GO:0051239~regulation of multicellular organismal process     | 26 | 0.956586 | 0.004159 | 1.821826 | 0.999661 | 0.135214 | 6.882338 |
| GO:0009653~anatomical structure morphogenesis                 | 31 | 1.140545 | 0.004289 | 1.700359 | 0.999736 | 0.13682  | 7.089314 |
| GO:0000278~mitotic cell cycle                                 | 14 | 0.515085 | 0.004292 | 2.484274 | 0.999738 | 0.134678 | 7.094208 |
| GO:0030323~respiratory tube development                       | 7  | 0.257542 | 0.004559 | 4.505791 | 0.999843 | 0.140162 | 7.518884 |
| GO:0030155~regulation of cell adhesion                        | 8  | 0.294334 | 0.004875 | 3.833916 | 0.999915 | 0.146807 | 8.019936 |
| GO:0048583~regulation of response to stimulus                 | 16 | 0.588668 | 0.004898 | 2.259125 | 0.999918 | 0.145181 | 8.056521 |
| GO:0048514~blood vessel morphogenesis                         | 10 | 0.367918 | 0.004931 | 3.11165  | 0.999923 | 0.143878 | 8.108957 |

|                                                               |    |          |          |          |          |          |          |
|---------------------------------------------------------------|----|----------|----------|----------|----------|----------|----------|
| GO:0050795~regulation of behavior                             | 5  | 0.183959 | 0.005094 | 7.136502 | 0.999944 | 0.146071 | 8.366423 |
| GO:0016043~cellular component organization                    | 54 | 1.986755 | 0.005449 | 1.419301 | 0.999972 | 0.153165 | 8.923657 |
| GO:0060249~anatomical structure homeostasis                   | 7  | 0.257542 | 0.005495 | 4.335761 | 0.999974 | 0.152153 | 8.99658  |
| GO:0045778~positive regulation of ossification                | 4  | 0.147167 | 0.005498 | 10.94264 | 0.999974 | 0.150061 | 9.000577 |
| GO:0048869~cellular developmental process                     | 40 | 1.47167  | 0.00553  | 1.539409 | 0.999976 | 0.148753 | 9.05016  |
| GO:0022402~cell cycle process                                 | 18 | 0.662252 | 0.005623 | 2.09169  | 0.99998  | 0.148996 | 9.196296 |
| GO:0042493~response to drug                                   | 10 | 0.367918 | 0.005725 | 3.039621 | 0.999983 | 0.149446 | 9.356061 |
| GO:0051789~response to protein stimulus                       | 7  | 0.257542 | 0.00575  | 4.29524  | 0.999984 | 0.148035 | 9.39446  |
| GO:0051129~negative regulation of cellular component organi   | 8  | 0.294334 | 0.005915 | 3.698919 | 0.999988 | 0.149955 | 9.65132  |
| GO:0006996~organelle organization                             | 33 | 1.214128 | 0.005971 | 1.626608 | 0.99999  | 0.149307 | 9.738685 |
| GO:0032967~positive regulation of collagen biosynthetic proce | 3  | 0.110375 | 0.006031 | 24.62093 | 0.999991 | 0.148768 | 9.832155 |
| GO:0010714~positive regulation of collagen metabolic process  | 3  | 0.110375 | 0.006031 | 24.62093 | 0.999991 | 0.148768 | 9.832155 |
| GO:0035295~tube development                                   | 10 | 0.367918 | 0.006445 | 2.984355 | 0.999996 | 0.156173 | 10.47273 |
| GO:0007204~elevation of cytosolic calcium ion concentration   | 7  | 0.257542 | 0.006566 | 4.178097 | 0.999997 | 0.156883 | 10.65795 |
| GO:0007010~cytoskeleton organization                          | 15 | 0.551876 | 0.006797 | 2.258801 | 0.999998 | 0.159977 | 11.01318 |
| GO:0048762~mesenchymal cell differentiation                   | 5  | 0.183959 | 0.007357 | 6.436845 | 0.999999 | 0.169936 | 11.86731 |
| GO:0014031~mesenchymal cell development                       | 5  | 0.183959 | 0.007357 | 6.436845 | 0.999999 | 0.169936 | 11.86731 |
| GO:0060485~mesenchyme development                             | 5  | 0.183959 | 0.007877 | 6.313059 | 1        | 0.178716 | 12.65432 |
| GO:0055074~calcium ion homeostasis                            | 9  | 0.331126 | 0.007971 | 3.143097 | 1        | 0.178543 | 12.79483 |
| GO:0042476~odontogenesis                                      | 5  | 0.183959 | 0.008989 | 6.079242 | 1        | 0.196768 | 14.31398 |
| GO:0002376~immune system process                              | 26 | 0.956586 | 0.009077 | 1.710472 | 1        | 0.196278 | 14.44408 |
| GO:0008285~negative regulation of cell proliferation          | 13 | 0.478293 | 0.00909  | 2.364337 | 1        | 0.194354 | 14.46303 |
| GO:0051480~cytosolic calcium ion homeostasis                  | 7  | 0.257542 | 0.009149 | 3.894836 | 1        | 0.193351 | 14.55008 |
| GO:0048871~multicellular organismal homeostasis               | 6  | 0.220751 | 0.009404 | 4.634528 | 1        | 0.196063 | 14.92625 |
| GO:0048584~positive regulation of response to stimulus        | 10 | 0.367918 | 0.009977 | 2.782026 | 1        | 0.204544 | 15.76417 |
| GO:0042542~response to hydrogen peroxide                      | 5  | 0.183959 | 0.010199 | 5.862126 | 1        | 0.206411 | 16.08574 |
| GO:0009612~response to mechanical stimulus                    | 5  | 0.183959 | 0.010199 | 5.862126 | 1        | 0.206411 | 16.08574 |
| GO:0030500~regulation of bone mineralization                  | 4  | 0.147167 | 0.010319 | 8.754109 | 1        | 0.206424 | 16.25978 |
| GO:0006259~DNA metabolic process                              | 16 | 0.588668 | 0.010364 | 2.076073 | 1        | 0.205111 | 16.32507 |
| GO:0002684~positive regulation of immune system process       | 10 | 0.367918 | 0.010489 | 2.758648 | 1        | 0.205237 | 16.50666 |
| GO:0055066~di-, tri-valent inorganic cation homeostasis       | 10 | 0.367918 | 0.010777 | 2.747105 | 1        | 0.208149 | 16.92023 |
| GO:0051347~positive regulation of transferase activity        | 10 | 0.367918 | 0.011053 | 2.735659 | 1        | 0.210801 | 17.31621 |
| GO:0032965~regulation of collagen biosynthetic process        | 3  | 0.110375 | 0.011498 | 17.90613 | 1        | 0.216213 | 17.95047 |
| GO:0006261~DNA-dependent DNA replication                      | 5  | 0.183959 | 0.011509 | 5.659984 | 1        | 0.214317 | 17.96616 |

|                                                                            |    |          |          |          |   |          |          |
|----------------------------------------------------------------------------|----|----------|----------|----------|---|----------|----------|
| GO:0032879~regulation of localization                                      | 18 | 0.662252 | 0.011592 | 1.937385 | 1 | 0.213633 | 18.08337 |
| GO:0000279~M phase                                                         | 12 | 0.441501 | 0.011737 | 2.394741 | 1 | 0.213979 | 18.28907 |
| GO:0022414~reproductive process                                            | 21 | 0.772627 | 0.011925 | 1.809412 | 1 | 0.215002 | 18.55446 |
| GO:0000904~cell morphogenesis involved in differentiation                  | 10 | 0.367918 | 0.01222  | 2.690812 | 1 | 0.217698 | 18.96933 |
| GO:0070167~regulation of biomineral formation                              | 4  | 0.147167 | 0.012331 | 8.206977 | 1 | 0.217454 | 19.12492 |
| GO:0006952~defense response                                                | 18 | 0.662252 | 0.012486 | 1.921634 | 1 | 0.217902 | 19.34204 |
| GO:0006979~response to oxidative stress                                    | 8  | 0.294334 | 0.01255  | 3.202723 | 1 | 0.216941 | 19.43141 |
| GO:0009888~tissue development                                              | 19 | 0.699043 | 0.012551 | 1.87588  | 1 | 0.215047 | 19.43356 |
| GO:0000003~reproduction                                                    | 21 | 0.772627 | 0.012736 | 1.797617 | 1 | 0.215955 | 19.6913  |
| GO:0035239~tube morphogenesis                                              | 7  | 0.257542 | 0.012843 | 3.618824 | 1 | 0.215683 | 19.84018 |
| GO:0055065~metal ion homeostasis                                           | 9  | 0.331126 | 0.012984 | 2.88245  | 1 | 0.215917 | 20.03571 |
| GO:0010035~response to inorganic substance                                 | 9  | 0.331126 | 0.012984 | 2.88245  | 1 | 0.215917 | 20.03571 |
| GO:0048511~rhythmic process                                                | 7  | 0.257542 | 0.01331  | 3.590552 | 1 | 0.218847 | 20.48589 |
| GO:0010712~regulation of collagen metabolic process                        | 3  | 0.110375 | 0.013661 | 16.41395 | 1 | 0.222077 | 20.96839 |
| GO:0007431~salivary gland development                                      | 3  | 0.110375 | 0.013661 | 16.41395 | 1 | 0.222077 | 20.96839 |
| GO:0008354~germ cell migration                                             | 3  | 0.110375 | 0.013661 | 16.41395 | 1 | 0.222077 | 20.96839 |
| GO:0060389~pathway-restricted SMAD protein phosphorylation                 | 3  | 0.110375 | 0.013661 | 16.41395 | 1 | 0.222077 | 20.96839 |
| GO:0010038~response to metal ion                                           | 7  | 0.257542 | 0.013788 | 3.562719 | 1 | 0.22205  | 21.14276 |
| GO:0050793~regulation of developmental process                             | 19 | 0.699043 | 0.01423  | 1.850832 | 1 | 0.226464 | 21.74561 |
| GO:0009607~response to biotic stimulus                                     | 13 | 0.478293 | 0.014293 | 2.222723 | 1 | 0.225497 | 21.83066 |
| GO:0051301~cell division                                                   | 11 | 0.404709 | 0.014662 | 2.448183 | 1 | 0.228768 | 22.32921 |
| GO:0044253~positive regulation of multicellular organismal morphogenesis   | 3  | 0.110375 | 0.015985 | 15.15134 | 1 | 0.244839 | 24.09454 |
| GO:0033273~response to vitamin                                             | 5  | 0.183959 | 0.017812 | 4.973925 | 1 | 0.266842 | 26.47025 |
| GO:0050896~response to stimulus                                            | 68 | 2.50184  | 0.017947 | 1.27487  | 1 | 0.266531 | 26.64248 |
| GO:0006268~DNA unwinding during replication                                | 3  | 0.110375 | 0.018465 | 14.0691  | 1 | 0.27107  | 27.30169 |
| GO:0022603~regulation of anatomical structure morphogenesis                | 9  | 0.331126 | 0.018619 | 2.698184 | 1 | 0.270977 | 27.49717 |
| GO:0042698~ovulation cycle                                                 | 5  | 0.183959 | 0.018724 | 4.899688 | 1 | 0.270275 | 27.62993 |
| GO:0007067~mitosis                                                         | 9  | 0.331126 | 0.019112 | 2.68592  | 1 | 0.273047 | 28.11689 |
| GO:0000280~nuclear division                                                | 9  | 0.331126 | 0.019112 | 2.68592  | 1 | 0.273047 | 28.11689 |
| GO:0050817~coagulation                                                     | 6  | 0.220751 | 0.019459 | 3.862107 | 1 | 0.275284 | 28.55148 |
| GO:0007596~blood coagulation                                               | 6  | 0.220751 | 0.019459 | 3.862107 | 1 | 0.275284 | 28.55148 |
| GO:0007178~transmembrane receptor protein serine/threonine kinase activity | 6  | 0.220751 | 0.020208 | 3.824611 | 1 | 0.282268 | 29.47935 |
| GO:0045860~positive regulation of protein kinase activity                  | 9  | 0.331126 | 0.020541 | 2.649786 | 1 | 0.284193 | 29.88794 |
| GO:0051781~positive regulation of cell division                            | 4  | 0.147167 | 0.021034 | 6.73393  | 1 | 0.28795  | 30.4897  |

|                                                                 |    |          |          |          |   |          |          |
|-----------------------------------------------------------------|----|----------|----------|----------|---|----------|----------|
| GO:0002687~positive regulation of leukocyte migration           | 3  | 0.110375 | 0.021095 | 13.13116 | 1 | 0.286655 | 30.56394 |
| GO:0000087~M phase of mitotic cell cycle                        | 9  | 0.331126 | 0.021149 | 2.637957 | 1 | 0.285289 | 30.6286  |
| GO:0006874~cellular calcium ion homeostasis                     | 8  | 0.294334 | 0.021428 | 2.8702   | 1 | 0.286514 | 30.96637 |
| GO:0007229~integrin-mediated signaling pathway                  | 5  | 0.183959 | 0.021633 | 4.689701 | 1 | 0.286883 | 31.21344 |
| GO:0030005~cellular di-, tri-valent inorganic cation homeostasi | 9  | 0.331126 | 0.022466 | 2.603094 | 1 | 0.294227 | 32.2081  |
| GO:0065008~regulation of biological quality                     | 33 | 1.214128 | 0.022633 | 1.474909 | 1 | 0.294112 | 32.4062  |
| GO:0048285~organelle fission                                    | 9  | 0.331126 | 0.023576 | 2.58036  | 1 | 0.302409 | 33.51296 |
| GO:0050764~regulation of phagocytosis                           | 3  | 0.110375 | 0.023871 | 12.31047 | 1 | 0.303613 | 33.85689 |
| GO:0007599~hemostasis                                           | 6  | 0.220751 | 0.024235 | 3.647545 | 1 | 0.305515 | 34.27743 |
| GO:0033674~positive regulation of kinase activity               | 9  | 0.331126 | 0.024706 | 2.558019 | 1 | 0.3085   | 34.81755 |
| GO:0032270~positive regulation of cellular protein metabolic p  | 9  | 0.331126 | 0.026038 | 2.536061 | 1 | 0.320286 | 36.32442 |
| GO:0031575~G1/S transition checkpoint                           | 3  | 0.110375 | 0.026788 | 11.58632 | 1 | 0.325877 | 37.15784 |
| GO:0044246~regulation of multicellular organismal metabolic p   | 3  | 0.110375 | 0.026788 | 11.58632 | 1 | 0.325877 | 37.15784 |
| GO:0000302~response to reactive oxygen species                  | 5  | 0.183959 | 0.027065 | 4.377054 | 1 | 0.326641 | 37.46287 |
| GO:0007165~signal transduction                                  | 56 | 2.060338 | 0.027112 | 1.294622 | 1 | 0.325121 | 37.51492 |
| GO:0007093~mitotic cell cycle checkpoint                        | 4  | 0.147167 | 0.027185 | 6.107518 | 1 | 0.323875 | 37.59527 |
| GO:0007162~negative regulation of cell adhesion                 | 4  | 0.147167 | 0.027185 | 6.107518 | 1 | 0.323875 | 37.59527 |
| GO:0008406~gonad development                                    | 6  | 0.220751 | 0.027805 | 3.517276 | 1 | 0.327987 | 38.27168 |
| GO:0050727~regulation of inflammatory response                  | 5  | 0.183959 | 0.02824  | 4.319461 | 1 | 0.330246 | 38.74297 |
| GO:0032268~regulation of cellular protein metabolic process     | 14 | 0.515085 | 0.028739 | 1.939201 | 1 | 0.33307  | 39.27852 |
| GO:0030509~BMP signaling pathway                                | 4  | 0.147167 | 0.028857 | 5.96871  | 1 | 0.332245 | 39.40476 |
| GO:0010769~regulation of cell morphogenesis involved in diffe   | 5  | 0.183959 | 0.029446 | 4.263365 | 1 | 0.335853 | 40.03009 |
| GO:0006508~proteolysis                                          | 25 | 0.919794 | 0.029589 | 1.557301 | 1 | 0.335254 | 40.18081 |
| GO:0051726~regulation of cell cycle                             | 11 | 0.404709 | 0.029649 | 2.181915 | 1 | 0.3339   | 40.24459 |
| GO:0033993~response to lipid                                    | 3  | 0.110375 | 0.02984  | 10.94264 | 1 | 0.333769 | 40.44589 |
| GO:0032392~DNA geometric change                                 | 3  | 0.110375 | 0.02984  | 10.94264 | 1 | 0.333769 | 40.44589 |
| GO:0032508~DNA duplex unwinding                                 | 3  | 0.110375 | 0.02984  | 10.94264 | 1 | 0.333769 | 40.44589 |
| GO:0001837~epithelial to mesenchymal transition                 | 3  | 0.110375 | 0.02984  | 10.94264 | 1 | 0.333769 | 40.44589 |
| GO:0006875~cellular metal ion homeostasis                       | 8  | 0.294334 | 0.029943 | 2.679829 | 1 | 0.332828 | 40.55369 |
| GO:0055080~cation homeostasis                                   | 10 | 0.367918 | 0.030675 | 2.295658 | 1 | 0.33761  | 41.31683 |
| GO:0030278~regulation of ossification                           | 5  | 0.183959 | 0.030681 | 4.208706 | 1 | 0.335792 | 41.32291 |
| GO:0001503~ossification                                         | 6  | 0.220751 | 0.03069  | 3.425521 | 1 | 0.334021 | 41.33216 |
| GO:0001775~cell activation                                      | 10 | 0.367918 | 0.031088 | 2.287659 | 1 | 0.335729 | 41.74256 |
| GO:0051247~positive regulation of protein metabolic process     | 9  | 0.331126 | 0.032128 | 2.431697 | 1 | 0.343047 | 42.80368 |

|                                                                |    |          |          |          |   |          |          |
|----------------------------------------------------------------|----|----------|----------|----------|---|----------|----------|
| GO:0051240~positive regulation of multicellular organismal prc | 9  | 0.331126 | 0.032725 | 2.421731 | 1 | 0.346372 | 43.40347 |
| GO:0002682~regulation of immune system process                 | 12 | 0.441501 | 0.033022 | 2.046415 | 1 | 0.347084 | 43.7006  |
| GO:0035272~exocrine system development                         | 3  | 0.110375 | 0.033024 | 10.36671 | 1 | 0.345263 | 43.70203 |
| GO:0051302~regulation of cell division                         | 4  | 0.147167 | 0.034192 | 5.587729 | 1 | 0.353315 | 44.85412 |
| GO:0048519~negative regulation of biological process           | 38 | 1.398087 | 0.035326 | 1.376888 | 1 | 0.360901 | 45.95194 |
| GO:0010721~negative regulation of cell development             | 4  | 0.147167 | 0.036076 | 5.471318 | 1 | 0.365184 | 46.66576 |
| GO:0002685~regulation of leukocyte migration                   | 3  | 0.110375 | 0.036333 | 9.848372 | 1 | 0.36542  | 46.90919 |
| GO:0030516~regulation of axon extension                        | 3  | 0.110375 | 0.036333 | 9.848372 | 1 | 0.36542  | 46.90919 |
| GO:0032570~response to progesterone stimulus                   | 3  | 0.110375 | 0.036333 | 9.848372 | 1 | 0.36542  | 46.90919 |
| GO:0008361~regulation of cell size                             | 8  | 0.294334 | 0.037671 | 2.54974  | 1 | 0.374282 | 48.15596 |
| GO:0060348~bone development                                    | 6  | 0.220751 | 0.03928  | 3.202723 | 1 | 0.385035 | 49.61901 |
| GO:0030003~cellular cation homeostasis                         | 9  | 0.331126 | 0.040028 | 2.326387 | 1 | 0.38892  | 50.28623 |
| GO:0007399~nervous system development                          | 25 | 0.919794 | 0.040598 | 1.508635 | 1 | 0.391383 | 50.78887 |
| GO:0048646~anatomical structure formation involved in morpl    | 11 | 0.404709 | 0.042483 | 2.051744 | 1 | 0.403631 | 52.41691 |
| GO:0048608~reproductive structure development                  | 6  | 0.220751 | 0.042842 | 3.126467 | 1 | 0.404378 | 52.72167 |
| GO:0048286~lung alveolus development                           | 3  | 0.110375 | 0.043313 | 8.953066 | 1 | 0.40593  | 53.11799 |
| GO:0045137~development of primary sexual characteristics       | 6  | 0.220751 | 0.044072 | 3.101849 | 1 | 0.409541 | 53.74995 |
| GO:0000902~cell morphogenesis                                  | 11 | 0.404709 | 0.044297 | 2.028691 | 1 | 0.409268 | 53.93552 |
| GO:0002248~connective tissue replacement during inflammatc     | 2  | 0.073584 | 0.044797 | 43.77054 | 1 | 0.410968 | 54.34679 |
| GO:0070141~response to UV-A                                    | 2  | 0.073584 | 0.044797 | 43.77054 | 1 | 0.410968 | 54.34679 |
| GO:0060317~cardiac epithelial to mesenchymal transition        | 2  | 0.073584 | 0.044797 | 43.77054 | 1 | 0.410968 | 54.34679 |
| GO:0001889~liver development                                   | 4  | 0.147167 | 0.046275 | 4.955156 | 1 | 0.419504 | 55.53983 |
| GO:0031344~regulation of cell projection organization          | 5  | 0.183959 | 0.046278 | 3.688529 | 1 | 0.417643 | 55.54222 |
| GO:0003006~reproductive developmental process                  | 9  | 0.331126 | 0.046457 | 2.255352 | 1 | 0.417023 | 55.68511 |
| GO:0001932~regulation of protein amino acid phosphorylation    | 7  | 0.257542 | 0.048269 | 2.656594 | 1 | 0.427581 | 57.1041  |
| GO:0000075~cell cycle checkpoint                               | 5  | 0.183959 | 0.04951  | 3.607462 | 1 | 0.434044 | 58.05043 |

## Cellular Component (CC)

| Term                                          | Count | %        | p value  | Fold Enri | Bonferro | Benjamir | FDR      |
|-----------------------------------------------|-------|----------|----------|-----------|----------|----------|----------|
| GO:0044421~extracellular region part          | 30    | 1.103753 | 3.02E-04 | 2.054236  | 0.083669 | 0.083669 | 0.400917 |
| GO:0016020~membrane                           | 136   | 5.003679 | 7.48E-04 | 1.230393  | 0.19437  | 0.102431 | 0.988747 |
| GO:0005578~proteinaceous extracellular matrix | 14    | 0.515085 | 0.00121  | 2.87593   | 0.29533  | 0.110126 | 1.596375 |
| GO:0031226~intrinsic to plasma membrane       | 33    | 1.214128 | 0.001524 | 1.78541   | 0.356468 | 0.104341 | 2.006121 |
| GO:0031012~extracellular matrix               | 14    | 0.515085 | 0.002378 | 2.667529  | 0.497446 | 0.128562 | 3.113836 |

|                                                           |     |          |          |          |          |          |          |
|-----------------------------------------------------------|-----|----------|----------|----------|----------|----------|----------|
| GO:0044459~plasma membrane part                           | 50  | 1.839588 | 0.003325 | 1.491955 | 0.618095 | 0.148223 | 4.329016 |
| GO:0005794~Golgi apparatus                                | 25  | 0.919794 | 0.003465 | 1.88462  | 0.633249 | 0.133502 | 4.50694  |
| GO:0005887~integral to plasma membrane                    | 31  | 1.140545 | 0.003991 | 1.715321 | 0.685163 | 0.134513 | 5.174683 |
| GO:0032580~Golgi cisterna membrane                        | 3   | 0.110375 | 0.007671 | 21.91185 | 0.891973 | 0.219065 | 9.72523  |
| GO:0031224~intrinsic to membrane                          | 102 | 3.752759 | 0.009393 | 1.222429 | 0.934619 | 0.238719 | 11.78551 |
| GO:0000307~cyclin-dependent protein kinase holoenzyme cor | 3   | 0.110375 | 0.011488 | 17.92787 | 0.964532 | 0.261813 | 14.23146 |
| GO:0005576~extracellular region                           | 44  | 1.618837 | 0.01179  | 1.438987 | 0.967531 | 0.248453 | 14.57902 |
| GO:0044425~membrane part                                  | 118 | 4.341428 | 0.013586 | 1.179202 | 0.980811 | 0.262219 | 16.61982 |
| GO:0000922~spindle pole                                   | 4   | 0.147167 | 0.01454  | 7.733593 | 0.985491 | 0.260924 | 17.68457 |
| GO:0005764~lysosome                                       | 9   | 0.331126 | 0.01521  | 2.803885 | 0.98808  | 0.255694 | 18.42519 |
| GO:0000323~lytic vacuole                                  | 9   | 0.331126 | 0.01521  | 2.803885 | 0.98808  | 0.255694 | 18.42519 |
| GO:0005886~plasma membrane                                | 73  | 2.685798 | 0.016346 | 1.270504 | 0.991461 | 0.257474 | 19.66684 |
| GO:0016021~integral to membrane                           | 97  | 3.568801 | 0.018824 | 1.203766 | 0.995881 | 0.276074 | 22.31456 |
| GO:0005694~chromosome                                     | 14  | 0.515085 | 0.023314 | 2.000647 | 0.998906 | 0.315289 | 26.90749 |
| GO:0044428~nuclear part                                   | 39  | 1.434879 | 0.025512 | 1.407072 | 0.999429 | 0.325034 | 29.06306 |
| GO:0005615~extracellular space                            | 18  | 0.662252 | 0.031741 | 1.727357 | 0.999911 | 0.372551 | 34.85636 |
| GO:0005795~Golgi stack                                    | 4   | 0.147167 | 0.032332 | 5.716134 | 0.999925 | 0.36384  | 35.38305 |
| GO:0044427~chromosomal part                               | 12  | 0.441501 | 0.033524 | 2.043592 | 0.999947 | 0.361055 | 36.43258 |
| GO:0005773~vacuole                                        | 9   | 0.331126 | 0.038531 | 2.347698 | 0.999988 | 0.389651 | 40.67154 |
| GO:0031985~Golgi cisterna                                 | 3   | 0.110375 | 0.043273 | 8.963937 | 0.999997 | 0.412978 | 44.444   |
| GO:0009897~external side of plasma membrane               | 7   | 0.257542 | 0.044958 | 2.706757 | 0.999998 | 0.412431 | 45.73001 |
| GO:0005654~nucleoplasm                                    | 21  | 0.772627 | 0.046995 | 1.565132 | 0.999999 | 0.414351 | 47.24751 |

## Molecular Function (MF)

| Term                                                         | Count | %        | p value  | Fold Enri | Bonferro | Benjamir | FDR      |
|--------------------------------------------------------------|-------|----------|----------|-----------|----------|----------|----------|
| GO:0005515~protein binding                                   | 151   | 5.555556 | 9.10E-06 | 1.268896  | 0.004693 | 0.004693 | 0.013164 |
| GO:0033764~steroid dehydrogenase activity, acting on the CH- | 5     | 0.183959 | 5.85E-04 | 12.68896  | 0.261114 | 0.140415 | 0.843273 |
| GO:0032403~protein complex binding                           | 11    | 0.404709 | 5.97E-04 | 3.845531  | 0.265517 | 0.097749 | 0.859856 |
| GO:0016229~steroid dehydrogenase activity                    | 5     | 0.183959 | 0.001003 | 11.05167  | 0.404624 | 0.121589 | 1.440702 |
| GO:0004033~aldo-keto reductase activity                      | 4     | 0.147167 | 0.00121  | 18.2721   | 0.465158 | 0.117641 | 1.735992 |
| GO:0047115~trans-1,2-dihydrobenzene-1,2-diol dehydrogenas    | 3     | 0.110375 | 0.001237 | 51.39027  | 0.472575 | 0.101137 | 1.774388 |
| GO:0017048~Rho GTPase binding                                | 5     | 0.183959 | 0.002173 | 9.015837  | 0.67517  | 0.148398 | 3.097759 |
| GO:0016628~oxidoreductase activity, acting on the CH-CH grou | 4     | 0.147167 | 0.002468 | 14.42534  | 0.721306 | 0.147605 | 3.512282 |
| GO:0004197~cysteine-type endopeptidase activity              | 6     | 0.220751 | 0.00393  | 5.71003   | 0.869436 | 0.202449 | 5.538121 |

|                                                               |     |          |          |          |          |            |          |
|---------------------------------------------------------------|-----|----------|----------|----------|----------|------------|----------|
| GO:0016616~oxidoreductase activity, acting on the CH-OH grou  | 7   | 0.257542 | 0.004089 | 4.611947 | 0.879759 | 0.190895   | 5.755615 |
| GO:0008233~peptidase activity                                 | 18  | 0.662252 | 0.004331 | 2.148722 | 0.893958 | 0.184532   | 6.086445 |
| GO:0005102~receptor binding                                   | 24  | 0.883002 | 0.00501  | 1.856082 | 0.925492 | 0.19459    | 7.009417 |
| GO:0070011~peptidase activity, acting on L-amino acid peptide | 17  | 0.62546  | 0.006487 | 2.12176  | 0.965432 | 0.228047   | 8.986607 |
| GO:0016614~oxidoreductase activity, acting on CH-OH group o   | 7   | 0.257542 | 0.006932 | 4.134849 | 0.972577 | 0.226541   | 9.574431 |
| GO:0016787~hydrolase activity                                 | 48  | 1.766004 | 0.007481 | 1.440638 | 0.979393 | 0.228028   | 10.29466 |
| GO:0015924~mannosyl-oligosaccharide mannosidase activity      | 3   | 0.110375 | 0.008756 | 20.55611 | 0.989399 | 0.247367   | 11.94797 |
| GO:0004175~endopeptidase activity                             | 13  | 0.478293 | 0.008829 | 2.375373 | 0.989795 | 0.236391   | 12.04165 |
| GO:0030234~enzyme regulator activity                          | 22  | 0.809419 | 0.010695 | 1.79672  | 0.996148 | 0.265707   | 14.40761 |
| GO:0030246~carbohydrate binding                               | 12  | 0.441501 | 0.014624 | 2.322724 | 0.999508 | 0.330258   | 19.19593 |
| GO:0008234~cysteine-type peptidase activity                   | 7   | 0.257542 | 0.017031 | 3.40172  | 0.999861 | 0.358558   | 22.00497 |
| GO:0008201~heparin binding                                    | 6   | 0.220751 | 0.01717  | 3.991477 | 0.999871 | 0.347128   | 22.16441 |
| GO:0015923~mannosidase activity                               | 3   | 0.110375 | 0.01948  | 13.70407 | 0.999962 | 0.370167   | 24.77011 |
| GO:0019899~enzyme binding                                     | 15  | 0.551876 | 0.020753 | 1.965211 | 0.99998  | 0.375874   | 26.17093 |
| GO:0001871~pattern binding                                    | 7   | 0.257542 | 0.02504  | 3.114562 | 0.999998 | 0.420899   | 30.71205 |
| GO:0030247~polysaccharide binding                             | 7   | 0.257542 | 0.02504  | 3.114562 | 0.999998 | 0.420899   | 30.71205 |
| GO:0047042~3-alpha-hydroxysteroid dehydrogenase (B-specifi    | 2   | 0.073584 | 0.028846 | 68.52036 |          | 1 0.454096 | 34.52407 |
| GO:0047026~3-alpha-hydroxysteroid dehydrogenase (A-specifi    | 2   | 0.073584 | 0.028846 | 68.52036 |          | 1 0.454096 | 34.52407 |
| GO:0047718~indanol dehydrogenase activity                     | 2   | 0.073584 | 0.028846 | 68.52036 |          | 1 0.454096 | 34.52407 |
| GO:0042277~peptide binding                                    | 8   | 0.294334 | 0.029175 | 2.70031  |          | 1 0.444986 | 34.8439  |
| GO:0008083~growth factor activity                             | 7   | 0.257542 | 0.030346 | 2.979146 |          | 1 0.445715 | 35.97233 |
| GO:0003824~catalytic activity                                 | 90  | 3.311258 | 0.032772 | 1.186386 |          | 1 0.459498 | 38.2514  |
| GO:0005088~Ras guanyl-nucleotide exchange factor activity     | 5   | 0.183959 | 0.039275 | 3.893202 |          | 1 0.510468 | 43.99334 |
| GO:0016627~oxidoreductase activity, acting on the CH-CH grou  | 4   | 0.147167 | 0.039725 | 5.270797 |          | 1 0.502702 | 44.37155 |
| GO:0005488~binding                                            | 193 | 7.100809 | 0.040924 | 1.055337 |          | 1 0.501856 | 45.36795 |
| GO:0004947~bradykinin receptor activity                       | 2   | 0.073584 | 0.042957 | 45.68024 |          | 1 0.508048 | 47.01984 |
| GO:0003680~AT DNA binding                                     | 2   | 0.073584 | 0.042957 | 45.68024 |          | 1 0.508048 | 47.01984 |
| GO:0017016~Ras GTPase binding                                 | 5   | 0.183959 | 0.043553 | 3.764855 |          | 1 0.50224  | 47.49514 |
| GO:0005509~calcium ion binding                                | 21  | 0.772627 | 0.046254 | 1.565754 |          | 1 0.513305 | 49.59991 |
| GO:0042802~identical protein binding                          | 16  | 0.588668 | 0.04687  | 1.713009 |          | 1 0.507909 | 50.06916 |



## Supplemental Table VI: UCSC Genome Browser Antisense LncRNAs

| <u>Gene Symbol/Chromosome Coordinates</u>                        | <u>Type</u>            |
|------------------------------------------------------------------|------------------------|
| <u>A1BG-AS1 at chr19:58863336-58866549 - (ENST00000595302)</u>   | NAT                    |
| <u>A2M-AS1 at chr12:9217773-9220651 - (ENST00000499762)</u>      | NAT                    |
| <u>A2ML1-AS1 at chr12:8928815-8983543 - (ENST00000537288)</u>    | 5' overlapping         |
| <u>AATK-AS1 at chr17:79139316-79155778 - (ENST00000571031)</u>   | 5' overlapping         |
| <u>ABCA9-AS1 at chr17:67000855-67014464 - (ENST00000458677)</u>  | Completely overlapping |
| <u>ABCC5-AS1 at chr3:183724126-183729207 - (ENST00000422946)</u> | Intronic               |
| <u>ACTA2-AS1 at chr10:90699232-90700368 - (ENST00000596007)</u>  | NAT                    |
| <u>ACTN1-AS1 at chr14:69446758-69448270 - (ENST00000553944)</u>  | Divergent              |
| <u>ACVR2B-AS1 at chr3:38492518-38496311 - (ENST00000441531)</u>  | 5' overlapping         |
| <u>ADAMTS19-AS1 at chr5:128795252-128796382 - (ENST0000050)</u>  | NAT                    |
| <u>ADAMTS9-AS1 at chr3:64568827-64572897 - (ENST0000046622)</u>  | Intronic               |
| <u>ADARB2-AS1 at chr10:1568958-1577868 - (ENST00000381301)</u>   | Intronic               |
| <u>ADIPOQ-AS1 at chr3:186569675-186573912 - (ENST0000042271)</u> | NAT                    |
| <u>ADORA2A-AS1 at chr22:24856465-24890763 - (ENST000004127)</u>  | NAT                    |
| <u>ADPGK-AS1 at chr15:73077353-73085304 - (ENST00000566745)</u>  | NAT                    |
| <u>AGAP2-AS1 at chr12:58120054-58122139 - (ENST00000542466)</u>  | NAT                    |
| <u>AGBL1-AS1 at chr15:86848282-86860404 - (ENST00000563472)</u>  | Intronic               |
| <u>AGBL5-AS1 at chr2:27272551-27273132 - (ENST00000444217)</u>   | Divergent              |
| <u>AIRN at chr6:160424323-160428696</u>                          | Intronic               |
| <u>ALDH1L1-AS1 at chr3:125822483-125826912 - (ENST000005123)</u> | NAT                    |
| <u>ALG13-AS1 at chrX:110949877-110954329 - (ENST00000430794)</u> | Completely overlapping |
| <u>ALKBH3-AS1 at chr11:43933997-43942444 - (ENST00000527960)</u> | Completely overlapping |
| <u>ANKRD33B-AS1 at chr5:10627372-10628337 - (ENST0000050631)</u> | NAT                    |
| <u>ANO1-AS1 at chr11:70033894-70034615 - (ENST00000524987)</u>   | NAT                    |
| <u>RASSF1-AS1 at chr3:50,374,942-50,375,727</u>                  | Completely overlapping |
| <u>AP4B1-AS1 at chr1:114399257-114443859 - (ENST00000419536)</u> | NAT                    |
| <u>APCDD1L-AS1 at chr20:57098216-57148880 - (ENST0000042420)</u> | Divergent              |
| <u>APOBEC3B-AS1 at chr22:39387564-39394214 - (ENST000005137)</u> | NAT                    |
| <u>AQP4-AS1 at chr18:24445272-24515910 - (ENST00000568797)</u>   | 5' overlapping         |
| <u>ARAP1-AS1 at chr11:72396120-72404853 - (ENST00000542022)</u>  | NAT                    |
| <u>ARHGAP26-AS1 at chr5:142239169-142248487 - (ENST0000043)</u>  | Intronic               |
| <u>ARHGAP31-AS1 at chr3:119033140-119041607 - (ENST0000046)</u>  | Intronic               |
| <u>ARHGAP5-AS1 at chr14:32544625-32545999 - (ENST000005535)</u>  | Divergent              |
| <u>ARHGEF19-AS1 at chr1:16524349-16524852 - (ENST0000045780)</u> | NAT                    |
| <u>ARHGEF26-AS1 at chr3:153744333-153748153 - (ENST00000597)</u> | NAT                    |
| <u>ARHGEF3-AS1 at chr3:56974104-56975076 - (ENST0000049593)</u>  | Completely overlapping |
| <u>ARHGEF7-AS1 at chr13:111796652-111797080 - (ENST00000435)</u> | Intronic               |
| <u>ARL5B-AS1 at chr10:18943793-18948167 - (ENST00000414939)</u>  | Divergent              |
| <u>ARMC2-AS1 at chr6:109244179-109245306 - (ENST0000042673)</u>  | Completely overlapping |
| <u>ARMCX3-AS1 at chrX:100877973-100879154 - (ENST000004542)</u>  | NAT                    |
| <u>ARPP21-AS1 at chr3:35691689-35693453 - (ENST00000415706)</u>  | Intronic               |
| <u>ARRDC3-AS1 at chr5:90676164-90716532</u>                      | 5' overlapping         |
| <u>ARSD-AS1 at chrX:2822945-2824122 - (ENST00000414053)</u>      | NAT                    |

ASB16-AS1 at chr17:42255065-42264085 - (ENST00000592897) NAT  
ASH1L-AS1 at chr1:155531864-155533735 - (ENST00000452809) NAT  
ASMTL-AS1 at chrX:1522403-1532917 - (ENST00000602357) NAT  
ATG10-AS1 at chr5:81368874-81369521 - (ENST00000504846) Intronic  
ATP11A-AS1 at chr13:113399763-113409007 - (ENST000004464) Intronic  
ATP13A5-AS1 at chr3:193025033-193032151 - (ENST000004146) 3' overlapping  
ATP1B3-AS1 at chr3:141637094-141637863 - (ENST0000049272) Intronic  
ATP6V0E2-AS1 at chr7:149567387-149577699 - (ENST00000464) NAT  
B4GALT4-AS1 at chr3:118945333-119009513 - (ENST000004707) NAT  
BACH1-AS1 at chr21:30742340-30743547 - (ENST00000449923) NAT  
BAIAP2-AS1 at chr17:79003502-79008501 - (ENST00000573167) Divergent  
BCDIN3D-AS1 at chr12:50222506-50233987 - (ENST0000054912) NAT  
BDNF-AS at chr11:27528399-27719718 NAT  
BHLHE40-AS1 at chr3:4940364-5021622 - (ENST00000441386) Divergent  
BIRC6-AS1 at chr2:32602699-32604667 - (ENST00000455572) NAT  
BOK-AS1 at chr2:242483818-242498392 - (ENST00000434306) NAT  
BOLA3-AS1 at chr2:74375172-74377115 - (ENST00000533563) NAT  
BRWD1-AS1 at chr21:40687633-40695144 - (ENST00000423274) Divergent  
BSN-AS1 at chr3:49677916-49679202 - (ENST00000442384) Intronic  
BTBD9-AS1 at chr6:38449468-38450307 - (ENST00000412822) Intronic  
BVES-AS1 at chr6:105585698-105606912 - (ENST00000369120) Divergent  
BZRAP1-AS1 at chr17:56414719-56430648 - (ENST00000579859) Divergent  
C10orf71-AS1 at chr10:50504495-50507063 - (ENST0000044270) Divergent  
C17orf76-AS1 at chr17:16344540-16344612 - (ENST0000039107) Divergent  
C1QTNF1-AS1 at chr17:77015674-77023737 - (ENST0000057752) 5' overlapping  
C1QTNF9-AS1 at chr13:24889863-24895736 - (ENST0000044965) NAT  
C1QTNF9B-AS1 at chr13:24465598-24471402 - (ENST000004170) NAT  
C1RL-AS1 at chr12:7273154-7275097 - (ENST00000535078) NAT  
C20orf166-AS1 at chr20:61144021-61148718 - (ENST000004361) 5' overlapping  
C4A-AS1 at chr6 ssto hap7:3333217-3336746 - (ENST00000428) NAT  
C4B-AS1 at chr6 ssto hap7:3234936-3242210 - (ENST00000429) NAT  
C6orf47-AS1 at chr6 ssto hap7:2956904-2959294 - (ENST00000429) NAT  
C9orf135-AS1 at chr9:72434743-72435599 - (ENST00000526458) Divergent  
CACNA1C-AS1 at chr12:2799064-2800323 - (ENST00000541673) NAT  
CACNA1G-AS1 at chr17:48634535-48636771 - (ENST000005089) 5' overlapping  
CACNA2D3-AS1 at chr3:54908632-54935282 - (ENST000004712) NAT  
CACTIN-AS1 at chr19:3607245-3613928 - (ENST00000592274) NAT  
CADM2-AS1 at chr3:86041333-86077157 - (ENST00000476021) Intronic  
CALML3-AS1 at chr10:5559332-5568204 - (ENST00000545372) NAT  
CAPN10-AS1 at chr2:241522117-241526116 - (ENST0000056781) Divergent  
CARS-AS1 at chr11:3050624-3062490 - (ENST00000499962) NAT  
CASK-AS1 at chrX:41379289-41381589 - (ENST00000451126) NAT  
CBR3-AS1 at chr21:37513705-37523008 - (ENST00000432988) NAT  
CCDC13-AS1 at chr3:42774069-42788260 - (ENST00000418161) NAT  
CCDC147-AS1 at chr10:106111349-106113333 - (ENST00000435) Divergent  
CCDC148-AS1 at chr2:159023162-159092681 - (ENST000004127) 3' overlapping  
CCDC39-AS1 at chr3:180397872-180418237 - (ENST0000049535) Intronic

CCDC74B-AS1 at chr2:130893551-130895332 - (ENST000004247) NAT  
CD27-AS1 at chr12:6559577-6560615 - (ENST00000538616) NAT  
CDH23-AS1 at chr10:73267910-73271630 - (ENST00000428918) Completely overlapping  
CDIPT-AS1 at chr16:29875155-29879368 - (ENST00000398859) Divergent  
CDKN2B-AS1 at chr9:22113677-22121096 - (ENST00000422420) NAT  
CEBPA-AS1 at chr19:33793976-33795656 - (ENST00000320232) Divergent  
CECR5-AS1 at chr22:17640289-17646335 - (ENST00000431923) NAT  
CELF2-AS1 at chr10:11358797-11361847 - (ENST00000379256) Intronic  
CERS6-AS1 at chr2:169639649-169642939 - (ENST00000594898) NAT  
CFLAR-AS1 at chr2:202015884-202018341 - (ENST00000601974) NAT  
CHKB-AS1 at chr22:51021455-51022306 - (ENST00000380711) Divergent  
CHL1-AS1 at chr3:405053-427478 - (ENST00000417612) NAT  
CHODL-AS1 at chr21:19207333-19257925 - (ENST00000447175) Divergent  
CHRM3-AS1 at chr1:240061316-240063172 - (ENST0000044472) Intronic  
CIRBP-AS1 at chr19:1269822-1270139 - (ENST00000600215) 5' overlapping  
CLDN10-AS1 at chr13:96131698-96186164 - (ENST0000041690) Intronic  
CLRN1-AS1 at chr3:150690465-150797617 - (ENST00000465576) NAT  
CLYBL-AS1 at chr13:100378501-100379745 - (ENST0000041600) Intronic  
CNOT10-AS1 at chr3:32772127-32778946 - (ENST00000475395) Completely overlapping  
CNTN4-AS1 at chr3:3080717-3102829 - (ENST00000442749) NAT  
COL18A1-AS1 at chr21:46839631-46844985 - (ENST0000048520) Intronic  
COL4A2-AS1 at chr13:111154922-111160526 - (ENST000004179) NAT  
COL5A1-AS1 at chr9:137541231-137544689 - (ENST0000037181) Intronic  
COX10-AS1 at chr17:13937168-13972796 - (ENST00000602539) NAT  
CPB2-AS1 at chr13:46627037-46687467 - (ENST00000415033) Completely overlapping  
CRYM-AS1 at chr16:21314568-21329912 - (ENST00000444326) 5' overlapping  
CSNK1G2-AS1 at chr19:1952588-1954585 - (ENST00000586395) Intronic  
CSTF3-AS1 at chr11:33183234-33213144 - (ENST00000500025) Divergent  
CTBP1-AS1 at chr4:1243088-1244234 Divergent  
CYP17A1-AS1 at chr10:104592478-104594273 - (ENST00000369) NAT  
CYP1B1-AS1 at chr2:38358247-38408997 - (ENST00000413828) Divergent  
CYP4A22-AS1 at chr1:47562325-47644943 - (ENST00000444042) Completely overlapping  
DACT3-AS1 at chr19:47165242-47176893 - (ENST00000525352) NAT  
DAOA-AS1 at chr13:106111404-106158030 - (ENST0000044840) Completely overlapping  
DBH-AS1 at chr9:136519708-136522435 - (ENST00000425189) NAT  
DCTN1-AS1 at chr2:74612845-74621009 - (ENST00000437991) NAT  
DDR1-AS1 at chr6 qbl hap6:2127752-2136685 - (ENST0000043) Divergent  
DDX11-AS1 at chr12:31203850-31213684 - (ENST00000535870) NAT  
DDX26B-AS1 at chrX:134654008-134654599 - (ENST000004308) NAT  
DDX39B-AS1 at chr6 ssto hap7:2840955-2841720 - (ENST00000) NAT  
DENND5B-AS1 at chr12:31744246-31768600 - (ENST000005373) 5' overlapping  
DGUOK-AS1 at chr2:74185097-74208560 - (ENST00000439192) NAT  
DHRS4-AS1 at chr14:24422199-24423061 - (ENST00000554036) NAT  
DIAPH2-AS1 at chrX:96857829-96897588 - (ENST00000542084) NAT  
DIAPH3-AS2 at chr13:60587440-60618491 - (ENST00000432995) Intronic  
DIAPH3-AS1 at chr13:60587440-60618491 - (ENST00000432995) Completely overlapping  
DICER1-AS1 at chr14:95643820-95646262 - (ENST00000439999) NAT

DIO2-AS1 at chr14:80677762-80921812 - (ENST00000553979) NAT  
DLEU7-AS1 at chr13:51381992-51423190 - (ENST00000413510) Completely overlapping  
DLG1-AS1 at chr3:197025123-197030618 - (ENST00000430666) NAT  
DLG3-AS1 at chrX:69672812-69675844 - (ENST00000431103) Completely overlapping  
DLG5-AS1 at chr10:79687130-79689582 - (ENST00000449852) Divergent  
DLGAP1-AS1 at chr18:3594453-3597226 - (ENST00000573355) Intronic  
DLX6-AS1 at chr7:96608393-96641194 - (ENST00000437541) Completely overlapping  
DMD-AS1 at chrX:31115794-31187673 - (ENST00000481143) NAT  
DNAH17-AS1 at chr17:76494911-76499138 - (ENST0000059837) NAT  
DNAJB8-AS1 at chr3:128182437-128191160 - (ENST0000047162) NAT  
DNAJC27-AS1 at chr2:25195052-25195699 - (ENST00000421842) Divergent  
DNAJC3-AS1 at chr13:96325089-96329179 - (ENST00000499499) Divergent  
DNAJC9-AS1 at chr10:75008141-75009116 - (ENST00000513954) NAT  
DNMBP-AS1 at chr10:101686966-101718138 - (ENST000004344) NAT  
DOCK9-AS1 at chr13:99484338-99486883 - (ENST00000439367) Intronic  
DPH6-AS1 at chr15:36148678-36150503 - (ENST00000560866) Divergent  
DPYD-AS1 at chr1:97561479-97788511 - (ENST00000422980) NAT  
DSCAM-AS1 at chr21:41755010-41757285 - (ENST00000455354) Intronic  
DYNLL1-AS1 at chr12:120928131-120933743 - (ENST000005007) Intronic  
EAF1-AS1 at chr3:15481397-15484963 - (ENST00000599742) NAT  
EFCAB14-AS1 at chr1:47139800-47157769 - (ENST00000418985) Completely overlapping  
EFCAB6-AS1 at chr22:43912134-43932747 - (ENST00000431327) NAT  
EGFLAM-AS1 at chr5:38425138-38427478 - (ENST00000508986) NAT  
EGFR-AS1 at chr7:55247443-55256627 - (ENST00000442411) NAT  
EHHADH-AS1 at chr3:184880689-184909743 - (ENST000004177) NAT  
EHMT2-AS1 at chr6:31851538-31851831 - (ENST00000434689) NAT  
EIF1AX-AS1 at chrX:20158086-20158562 - (ENST00000424026) Intronic  
EIF2B5-AS1 at chr3:184264502-184274706 - (ENST00000421870) Intronic  
EIF3J-AS1 at chr15:44827450-44829098 - (ENST00000560049) Divergent  
ELMO1-AS1 at chr7:37037401-37053235 - (ENST00000419535) NAT  
ELOVL2-AS1 at chr6:11044926-11078459 - (ENST00000456616) Intronic  
ENO1-AS1 at chr1:8938894-8939953 - (ENST00000442636) NAT  
ENOX1-AS1 at chr13:44118054-44122192 - (ENST00000444442) Intronic  
ENTPD1-AS1 at chr10:97848666-97849956 - (ENST00000444375) NAT  
ENTPD3-AS1 at chr3:40487834-40494820 - (ENST00000420850) NAT  
EPB41L4A-AS1 at chr5:111496631-111498008 - (ENST00000508) Intronic  
EPHA1-AS1 at chr7:143104926-143112923 - (ENST00000421648) 5' overlapping  
EPN2-AS1 at chr17:19199909-19209574 - (ENST00000451099) Intronic  
ERICH1-AS1 at chr8:833328-1055066 - (ENST00000578889) Completely overlapping  
ETV5-AS1 at chr3:185796959-185798736 - (ENST00000453370) Completely overlapping  
EVX1-AS1 at chr7:27281048-27286848 NAT  
EXTL3-AS1 at chr8:28557642-28558770 - (ENST00000519870) NAT  
EZR-AS1 at chr6:159239043-159241625 - (ENST00000451712) NAT  
F10-AS1 at chr13:113782469-113783194 - (ENST00000424635) Intronic  
FAM13A-AS1 at chr4:89642866-89649837 - (ENST00000511543) NAT  
FAM170B-AS1 at chr10:50345540-50359195 - (ENST000004400) Completely overlapping  
FAM181A-AS1 at chr14:94391579-94393412 - (ENST000005557) 5' overlapping

FAM222A-AS1 at chr12:110172217-110173762 - (ENST00000531) 3' overlapping  
FAM83C-AS1 at chr20:33873054-33873559 - (ENST0000042916) NAT  
FAM83H-AS1 at chr8:144823268-144828506 - (ENST000004350) Divergent  
FANK1-AS1 at chr10:127660757-127661695 - (ENST0000044545) Intronic  
FARP1-AS1 at chr13:99087659-99088094 - (ENST00000432229) NAT  
FBXL19-AS1 at chr16:30930640-30934590 - (ENST00000563777) NAT  
FENDRR at chr16:86521271-86542466 Divergent  
FER1L6-AS1 at chr8:124996378-125053023 - (ENST0000051856) Completely overlapping  
FEZF1-AS1 at chr7:121946935-121948611 - (ENST00000424404) NAT  
FGD5-AS1 at chr3:14986531-14989012 - (ENST00000440079) 3' overlapping  
FGF12-AS1 at chr3:191956419-192000886 - (ENST00000414920) Intronic  
FGF13-AS1 at chrX:137794269-137798779 - (ENST00000438238) Intronic  
FGF14-AS1 at chr13:103019914-103026016 - (ENST0000045163) Intronic  
FLG-AS1 at chr1:152309544-152339163 - (ENST00000445097) NAT  
FLNB-AS1 at chr3:58149700-58151041 - (ENST00000472922) NAT  
FLVCR1-AS1 at chr1:213029946-213031430 - (ENST0000042616) Divergent  
FMR1-AS1 at chrX:146990949-146993335 - (ENST00000601841) NAT  
FOXD2-AS1 at chr1:47897805-47900313 - (ENST00000445551) Divergent  
FOXN3-AS1 at chr14:89883698-89886137 - (ENST00000555562) Intronic  
FOXP1-AS1 at chr3:71338920-71355004 - (ENST00000465742) Completely overlapping  
FREM2-AS1 at chr13:39395935-39401707 - (ENST00000448887) NAT  
FRMPD4-AS1 at chrX:12391286-12393252 - (ENST00000425057) Intronic  
FRY-AS1 at chr13:32599451-32605776 - (ENST00000428419) NAT  
FTCD-AS1 at chr21:47571528-47572561 - (ENST00000446649) NAT  
FZD10-AS1 at chr12:130640279-130646801 - (ENST0000053709) Divergent  
GABPB1-AS1 at chr15:50648668-50659636 - (ENST0000055859) NAT  
GAS5-AS1 at chr1:173832386-173833079 - (ENST00000602767) NAT  
GAS6-AS1 at chr13:114518603-114542321 - (ENST00000458001) NAT  
GATA3-AS1 at chr10:8092439-8094458 - (ENST00000438755) Intronic  
GATA6-AS1 at chr18:19747631-19748331 - (ENST00000584201) Divergent  
GCSAML-AS1 at chr1:247687981-247690054 - (ENST000004204) Completely overlapping  
GDNF-AS1 at chr5:37873527-37875901 - (ENST00000510986) Divergent  
GFOD1-AS1 at chr6:13486526-13487084 - (ENST00000446001) NAT  
GK-AS1 at chrX:30718115-30742291 - (ENST00000464659) Completely overlapping  
GLIS3-AS1 at chr9:3898642-3901248 - (ENST00000451340) NAT  
GLYCTK-AS1 at chr3:52330673-52332930 - (ENST00000472761) Intronic  
GNAS-AS1 at chr20:57414837-57415899 - (ENST00000443966) 5' overlapping  
GNG12-AS1 at chr1:68604040-68607471 - (ENST00000434072) 5' overlapping  
GPC5-AS1 at chr13:93353642-93373867 - (ENST00000419288) Intronic  
GPC6-AS1 at chr13:94806447-94840245 - (ENST00000436329) Intronic  
GPR158-AS1 at chr10:25447001-25465205 - (ENST00000449643) NAT  
GPR50-AS1 at chrX:150343664-150346308 - (ENST0000045419) NAT  
GRIK1-AS2 at chr21:31132713-31136321 - (ENST00000413131) 3' overlapping  
GRIK1-AS1 at chr21:31132713-31136321 - (ENST00000413131) Intronic  
GRM5-AS1 at chr11:88244916-88245529 - (ENST00000531994) NAT  
GRM7-AS1 at chr3:7561428-7576971 - (ENST00000420230) Intronic  
GRTP1-AS1 at chr13:114006131-114016183 - (ENST0000042324) NAT

GSN-AS1 at chr9:124043046-124047808 - (ENST00000414544) NAT  
GYG2-AS1 at chrX:2770781-2771801 - (ENST00000445107) Intronic  
H1FX-AS1 at chr3:129037079-129043412 - (ENST00000502789) NAT  
HAND2-AS1 at chr4:174452696-174458510 - (ENST0000050442) Divergent  
HAS2-AS1 at chr8:122653676-122656933 - (ENST00000520043) NAT  
HCFC1-AS1 at chrX:153234776-153235538 - (ENST00000438219) Intronic  
HDAC11-AS1 at chr3:13518482-13521553 - (ENST00000424112) NAT  
HEXA-AS1 at chr15:72668454-72671129 - (ENST00000567598) NAT  
HHATL-AS1 at chr3:42744203-42748154 - (ENST00000600839) NAT  
HHIP-AS1 at chr4:145564524-145582509 - (ENST00000512359) NAT  
HIF1A-AS1 at chr14:62147759-62162541 - (ENST00000557544) NAT  
HLA-AS1 at chr1:221006105-221053482 - (ENST00000552026) NAT  
HLA-DQB1-AS1 at chr6 ssto hap7:4056409-4057258 - (ENST00000552026) NAT  
HLA-F-AS1 at chr6 ssto hap7:1047268-1054496 - (ENST00000552026) NAT  
HLTF-AS1 at chr3:148804119-148820610 - (ENST00000492461) NAT  
HM13-AS1 at chr20:30155510-30161066 - (ENST00000412178) 3' overlapping  
HNF1A-AS1 at chr12:121412188-121418768 - (ENST0000053530) 5' overlapping  
HNRNPU-AS1 at chr1:245008554-245017805 - (ENST000004897) Divergent  
HOTTIP at chr7:27240040-27246130 Divergent  
HOXA11-AS at chr7:27225027-27228912 NAT  
HOXB-AS1 at chr17:46624054-46628610 - (ENST00000502764) NAT  
HOXC-AS1 at chr12:54392806-54393794 - (ENST00000505700) Intronic  
HOXD-AS1 at chr2:177041252-177053259 - (ENST00000452365) NAT  
HPN-AS1 at chr19:35549963-35597208 - (ENST00000392227) Divergent  
HS6ST2-AS1 at chrX:131801670-131803916 - (ENST0000045526) Completely overlapping  
HTR2A-AS1 at chr13:47426287-47430434 - (ENST00000430913) Intronic  
HTR3E-AS1 at chr3:183812906-183822966 - (ENST00000431427) NAT  
HTT-AS1 at chr4:3065198-3076241 - (ENST00000503893) Divergent  
HYI-AS1 at chr1:43919598-43922666 - (ENST00000444386) NAT  
IDH1-AS1 at chr2:209120124-209120892 - (ENST00000448588) Divergent  
IDI2-AS1 at chr10:1068614-1081861 - (ENST00000434470) NAT  
IFNG-AS1 at chr12:68383309-68628466 - (ENST00000536914) Divergent  
IGBP1-AS1 at chrX:69383692-69385056 - (ENST00000366397) Intronic  
IGSF11-AS1 at chr3:118661920-118667088 - (ENST0000047700) Intronic  
IL10RB-AS1 at chr21:34636178-34638565 - (ENST00000411998) NAT  
IL20RB-AS1 at chr3:136677967-136701038 - (ENST0000046217) Completely overlapping  
IL21-AS1 at chr4:123540138-123610311 - (ENST00000417927) NAT  
IL21R-AS1 at chr16:27458990-27464714 - (ENST00000563191) NAT  
ILF3-AS1 at chr19:10762538-10764520 - (ENST00000591501) Divergent  
INHBA-AS1 at chr7:41733546-41752792 - (ENST00000420821) 3' overlapping  
INTS6-AS1 at chr13:52028304-52036761 - (ENST00000601034) NAT  
IPO9-AS1 at chr1:201789583-201798213 - (ENST00000421159) NAT  
IQCF5-AS1 at chr3:51907612-51909783 - (ENST00000440723) NAT  
IQCH-AS1 at chr15:67812344-67813400 - (ENST00000559702) 3' overlapping  
IQCJ-SCHIP1-AS1 at chr3:159486106-159486401 - (ENST00000414544) Intronic  
ISM1-AS1 at chr20:13218448-13220321 - (ENST00000431407) Intronic

ITCH-AS1 at chr20:33029397-33029830 - (ENST00000454205) Intronic  
ITGB2-AS1 at chr21:46341241-46347943 - (ENST00000429132) NAT  
ITGB5-AS1 at chr3:124500002-124506604 - (ENST00000495917) NAT  
ITIH4-AS1 at chr3:52857951-52859330 - (ENST00000478366) NAT  
ITPK1-AS1 at chr14:93533797-93538497 - (ENST00000553639) Intronic  
ITPKB-AS1 at chr1:226856598-226864046 - (ENST00000453525) Intronic  
ITPR1-AS1 at chr3:4532575-4534847 - (ENST00000412804) Divergent  
JARID2-AS1 at chr6:15248046-15248865 - (ENST00000441978) Intronic  
JAZF1-AS1 at chr7:28279503-28283536 - (ENST00000444500) NAT  
JPX at chrX:73164159-73290217 5' overlapping  
JRKL-AS1 at chr11:96180296-96239990 - (ENST00000511243) Intronic  
KANSL1-AS1 at chr17:44273424-44274089 - (ENST00000572634) Intronic  
KCNAB1-AS1 at chr3:156158946-156164694 - (ENST00000467795) Intronic  
KCNC4-AS1 at chr1:110751456-110752609 - (ENST00000455967) Divergent  
KCND3-AS1 at chr1:112452307-112453552 - (ENST00000419258) Intronic  
KCNIP2-AS1 at chr10:103578835-103588536 - (ENST00000412313) NAT  
KCNJ2-AS1 at chr17:68163102-68165543 - (ENST00000590966) NAT  
KCNQ1-AS1 at chr11:2861365-2882798 - (ENST00000440887) NAT  
KCNQ5-AS1 at chr6:73844526-73853237 - (ENST00000429832) Intronic  
KCTD21-AS1 at chr11:77884821-77886369 - (ENST00000600795) NAT  
KDM4A-AS1 at chr1:44169985-44173001 - (ENST00000418149) NAT  
KIAA0196-AS1 at chr8:126052926-126057231 - (ENST00000519159) NAT  
KIAA1984-AS1 at chr9:139698379-139703300 - (ENST00000414141) NAT  
KIF25-AS1 at chr6:168394852-168397757 - (ENST00000414364) Divergent  
KIF9-AS1 at chr3:47205987-47288091 - (ENST00000429315) NAT  
KIRREL3-AS1 at chr11:126413842-126480843 - (ENST00000548282) Intronic  
KLHL6-AS1 at chr3:183266523-183270114 - (ENST00000491676) Intronic  
KLHL7-AS1 at chr7:23140847-23145322 - (ENST00000419813) Divergent  
KRBOX1-AS1 at chr3:42975744-42978277 - (ENST00000447834) NAT  
KRTAP5-AS1 at chr11:1594879-1618671 - (ENST00000534077) Completely overlapping  
KTN1-AS1 at chr14:56042905-56046814 - (ENST00000535211) Divergent  
LAMTOR5-AS1 at chr1:110968593-110969392 - (ENST00000597597) NAT  
LARGE-AS1 at chr22:34140116-34146670 - (ENST00000416275) Intronic  
LARS2-AS1 at chr3:45525466-45551037 - (ENST00000442534) Completely overlapping  
LATS2-AS1 at chr13:21579296-21592261 - (ENST00000422510) Intronic  
LBX1-AS1 at chr10:102997760-102998616 - (ENST00000456391) NAT  
LBX2-AS1 at chr2:74729722-74731805 - (ENST00000548978) NAT  
LDLRAD4-AS1 at chr18:13419420-13427479 - (ENST0000058867) Intronic  
LEF1-AS1 at chr4:109097444-109177992 - (ENST00000512129) NAT  
LEMD1-AS1 at chr1:205342380-205356568 - (ENST00000447833) 3' overlapping  
LENG8-AS1 at chr19:54959343-54960223 - (ENST00000448978) NAT  
LEPREL1-AS1 at chr3:189838753-189862635 - (ENST00000412212) 5' overlapping  
LGALS8-AS1 at chr1:236686371-236687800 - (ENST0000049381) NAT  
LHFPL3-AS1 at chr7:104439840-104443986 - (ENST0000045089) Intronic  
LIFR-AS1 at chr5:38559044-38579696 - (ENST00000514291) 5' overlapping  
LIMD1-AS1 at chr3:45720535-45730374 - (ENST00000427644) NAT  
LIPE-AS1 at chr19:42965000-42989625 - (ENST00000596116) NAT

LMCD1-AS1 at chr3:8651124-8653586 - (ENST00000458666) Intronic  
LMLN-AS1 at chr3:197765192-197766105 - (ENST00000423460) NAT  
LNX1-AS1 at chr4:54368058-54405515 - (ENST00000514364) Completely overlapping  
LOXL1-AS1 at chr15:74211544-74220036 - (ENST00000564963) NAT  
LPP-AS1 at chr3:188280026-188286454 - (ENST00000434996) Intronic  
LRP4-AS1 at chr11:46867978-46895947 - (ENST00000502049) NAT  
LRRC3-AS1 at chr21:45870869-45875167 - (ENST00000426578) Divergent  
LSAMP-AS1 at chr3:116078871-116088937 - (ENST00000490351) Intronic  
LY86-AS1 at chr6:6621197-6622930 - (ENST00000606044) 5' overlapping  
LYST-AS1 at chr1:236002783-236003482 - (ENST00000412098) Intronic  
LZTS1-AS1 at chr8:20147685-20147800 - (ENST00000363023) Intronic  
MACC1-AS1 at chr7:20181539-20193154 - (ENST00000439285) Intronic  
MACROD2-AS1 at chr20:14885587-14910161 - (ENST000004394) Intronic  
MAFG-AS1 at chr17:79886277-79888393 - (ENST00000583492) Divergent  
MAGEA8-AS1 at chrX:149007636-149009870 - (ENST000004276) Completely overlapping  
MAGI1-AS1 at chr3:65879491-65910972 - (ENST00000472514) Intronic  
MAGI2-AS1 at chr7:78569166-78570211 - (ENST00000428298) Intronic  
MAMDC2-AS1 at chr9:72786915-72787683 - (ENST0000042057) Completely overlapping  
MANEA-AS1 at chr6:96023059-96025326 - (ENST00000564541) NAT  
MAP3K14-AS1 at chr17:43339558-43345630 - (ENST000005853) NAT  
MAPKAPK5-AS1 at chr12:112277581-112279514 - (ENST000005) NAT  
MAPT-AS1 at chr17:43921352-43922123 - (ENST00000581125) 5' overlapping  
MAST4-AS1 at chr5:66297211-66299781 - (ENST00000451496) Intronic  
MATN1-AS1 at chr1:31198567-31199211 - (ENST00000443076) NAT  
MCCC1-AS1 at chr3:182734043-182735596 - (ENST0000047173) NAT  
MCF2L-AS1 at chr13:113621798-113623138 - (ENST0000044678) NAT  
MCM3AP-AS1 at chr21:47649438-47655367 - (ENST0000042007) NAT  
MDC1-AS1 at chr6 ssto hap7:2003151-2013267 - (ENST000004) NAT  
MED14-AS1 at chrX:40594652-40597950 - (ENST00000456333) NAT  
MED4-AS1 at chr13:48651273-48654127 - (ENST00000422483) NAT  
MEF2C-AS1 at chr5:88714624-88762215 - (ENST00000508742) 5' overlapping  
MEIS1-AS1 at chr2:66666575-66668968 - (ENST00000454595) NAT  
MFI2-AS1 at chr3:196730621-196731611 - (ENST00000414354) NAT  
MID1IP1-AS1 at chrX:38660821-38663136 - (ENST00000436893) NAT  
MIS18A-AS1 at chr21:33650174-33653299 - (ENST00000453549) 5' overlapping  
MKNK1-AS1 at chr1:47004368-47035927 - (ENST00000602433) NAT  
MLIP-AS1 at chr6:53911899-53944524 - (ENST00000589041) Intronic  
MLK7-AS1 at chr2:174062440-174146764 - (ENST00000423106) NAT  
MLLT4-AS1 at chr6:168226371-168227135 - (ENST00000414943) Divergent  
MME-AS1 at chr3:154876530-154901074 - (ENST00000484721) NAT  
MMP24-AS1 at chr20:33865145-33865932 - (ENST00000456790) NAT  
MORC1-AS1 at chr3:108820303-108829189 - (ENST0000048082) Completely overlapping  
MORC2-AS1 at chr22:31318436-31328436 - (ENST00000441558) NAT  
MORF4L2-AS1 at chrX:102942212-102946700 - (ENST00000435) NAT  
MPRIP-AS1 at chr17:16979352-16981066 - (ENST00000428367) Intronic  
MRGPRG-AS1 at chr11:3242905-3243597 - (ENST00000541883) NAT  
MRPL23-AS1 at chr11:2004467-2011150 - (ENST00000419080) NAT



MRVI1-AS1 at chr11:10614744-10621453 - (ENST00000525578) 3' overlapping  
MTOR-AS1 at chr1:11204481-11209594 - (ENST00000420480) NAT  
MTUS2-AS1 at chr13:30056257-30061654 - (ENST00000587588) Completely overlapping  
MYB-AS1 at chr6:135516221-135517133 - (ENST00000455534) NAT  
MYCBP2-AS2 at chr13:77649673-77651737 - (ENST0000059634) Intronic  
MYCBP2-AS1 at chr13:77649673-77651737 - (ENST0000059634) NAT  
MYLK-AS1 at chr3:123304403-123349668 - (ENST00000470449) NAT  
MYO16-AS1 at chr13:109816250-109853831 - (ENST000004392) Completely overlapping  
NAALADL2-AS1 at chr3:175490933-175494121 - (ENST000004262) Intronic  
NADK2-AS1 at chr5:36221157-36222004 - (ENST00000501794) Intronic  
NALCN-AS1 at chr13:101360579-101711638 - (ENST0000045784) NAT  
NAPA-AS1 at chr19:47987565-48004854 - (ENST00000594367) NAT  
NAV2-AS1 at chr11:20141230-20142178 - (ENST00000526642) NAT  
NCAM1-AS1 at chr11:113140441-113144623 - (ENST000005262) NAT  
NCBP2-AS1 at chr3:196666748-196669405 - (ENST00000447775) NAT  
NCOA7-AS1 at chr6:126119002-126140004 - (ENST0000042900) NAT  
NDFIP2-AS1 at chr13:80051499-80055366 - (ENST00000457171) NAT  
NDP-AS1 at chrX:43808978-43828866 - (ENST00000435093) Completely overlapping  
NDUFA6-AS1 at chr22:42519739-42521033 - (ENST0000045145) Divergent  
NDUFB2-AS1 at chr7:140395136-140396877 - (ENST000004654) NAT  
NEBL-AS1 at chr10:21463283-21463852 - (ENST00000417845) NAT  
NEXN-AS1 at chr1:78347044-78353374 - (ENST00000597757) NAT  
NHS-AS1 at chrX:17570470-17575508 - (ENST00000452788) Intronic  
NICN1-AS1 at chr3:49460379-49461864 - (ENST00000424915) NAT  
NKX2-1-AS1 at chr14:36988483-36992221 - (ENST00000521292) NAT  
NKX2-2-AS1 at chr20:21492085-21492947 - (ENST00000549659) NAT  
NLGN1-AS1 at chr3:173628426-173638448 - (ENST00000457192) Intronic  
 LGN4Y-AS1 at chrY:16905522-16915913 - (ENST00000434164) Intronic  
NOP14-AS1 at chr4:2939378-2942168 - (ENST00000512802) NAT  
NOVA1-AS1 at chr14:27251374-27275673 - (ENST00000552101) Divergent  
NPHP3-AS1 at chr3:132441186-132593067 - (ENST0000050444) NAT  
NPPA-AS1 at chr1:11903918-11908136 - (ENST00000400892) NAT  
NPSR1-AS1 at chr7:34758474-34873941 - (ENST00000442669) 5' overlapping  
NR2F1-AS1 at chr5:92889467-92921354 - (ENST00000513055) 3' overlapping  
NR2F2-AS1 at chr15:96833674-96870556 - (ENST00000560010) 5' overlapping  
NREP-AS1 at chr5:111305149-111353006 - (ENST00000503242) 5' overlapping  
NRG3-AS1 at chr10:83992006-83992676 - (ENST00000505481) Intronic  
NRON at chr9:129170054-129172783 Intronic  
NTRK3-AS1 at chr15:88795961-88814297 - (ENST00000569588) 5' overlapping  
NUCB1-AS1 at chr19:49414187-49422148 - (ENST00000416432) NAT  
NUTM2A-AS1 at chr10:89093797-89096586 - (ENST0000036644) Divergent  
OCIAD1-AS1 at chr4:48854025-48862220 - (ENST00000513576) Completely overlapping  
OGFR-AS1 at chr20:61431979-61436939 - (ENST00000431361) 5' overlapping  
OIP5-AS1 at chr15:41576230-41601901 - (ENST00000501665) Divergent  
OOEP-AS1 at chr6:74079427-74097440 - (ENST00000445350) NAT  
OPA1-AS1 at chr3:193336398-193345126 - (ENST00000444085) NAT  
OSBPL10-AS1 at chr3:31758483-31763069 - (ENST00000444503) Intronic

OSER1-AS1 at chr20:42839892-42853618 - (ENST00000435163) Divergent  
OSGEPL1-AS1 at chr2:190627565-190630053 - (ENST000005238) NAT  
OSTM1-AS1 at chr6:108444837-108480596 - (ENST0000044118) Intronic  
OSTN-AS1 at chr3:190931080-190952394 - (ENST00000430375) NAT  
OTX2-AS1 at chr14:57280009-57395757 - (ENST00000554358) Intronic  
OVCH1-AS1 at chr12:29578858-29640421 - (ENST00000549411) Divergent  
OXCT1-AS1 at chr5:41870222-41870818 - (ENST00000510509) NAT  
P4HA2-AS1 at chr5:131520569-131528501 - (ENST00000417667) NAT  
PABPC5-AS1 at chrX:90669877-90689998 - (ENST00000456187) 5' overlapping  
PAN3-AS1 at chr13:28710980-28712330 - (ENST00000563843) NAT  
PAPPA-AS1 at chr9:119160439-119162885 - (ENST00000445861) NAT  
PARD3-AS1 at chr10:35104695-35105314 - (ENST00000446211) Divergent  
PAXBP1-AS1 at chr21:34102663-34109784 - (ENST00000455170) 3' overlapping  
PCBP1-AS1 at chr2:70310712-70313313 - (ENST00000437019) Divergent  
PCCA-AS1 at chr13:101131813-101133411 - (ENST00000414553) Intronic  
PCDH9-AS1 at chr13:66878003-66897693 - (ENST00000430861) NAT  
PCED1B-AS1 at chr12:47602203-47610218 - (ENST00000500365) NAT  
PCOLCE-AS1 at chr7:100200537-100201829 - (ENST0000044602) NAT  
PCYT1B-AS1 at chrX:24668190-24676354 - (ENST00000432626) Intronic  
PDCD4-AS1 at chr10:112629626-112631991 - (ENST0000042036) Divergent  
PDX1-AS1 at chr13:28407581-28495541 - (ENST00000499662) 5' overlapping  
PDZRN3-AS1 at chr3:73672719-73674658 - (ENST00000478988) 5' overlapping  
PEX5L-AS1 at chr3:179593164-179599397 - (ENST00000466064) NAT  
PGM5-AS1 at chr9:70970105-70972768 - (ENST00000417887) 5' overlapping  
PHEX-AS1 at chrX:22180850-22191100 - (ENST00000424650) Completely overlapping  
PHKA1-AS1 at chrX:71908800-71932190 - (ENST00000420998) Completely overlapping  
PHKA2-AS1 at chrX:18910862-18912615 - (ENST00000439295) NAT  
PITPNA-AS1 at chr17:1420225-1421390 - (ENST00000425081) NAT  
PITRM1-AS1 at chr10:3185241-3190814 - (ENST00000430356) NAT  
PLCB2-AS1 at chr15:40592871-40594021 - (ENST00000559520) NAT  
PLCE1-AS1 at chr10:96042918-96046828 - (ENST00000440198) NAT  
PLCH1-AS1 at chr3:155166973-155175542 - (ENST00000475196) Intronic  
PLCL2-AS1 at chr3:17084234-17085684 - (ENST00000414844) NAT  
PLCXD2-AS1 at chr3:111395583-111396280 - (ENST0000049313) Intronic  
PLS1-AS1 at chr3:142373626-142375587 - (ENST00000485338) Intronic  
PLSCR5-AS1 at chr3:146307389-146308112 - (ENST0000047381) NAT  
POTEH-AS1 at chr22:16274560-16278602 - (ENST00000422014) NAT  
POU6F2-AS1 at chr7:39444197-39445945 - (ENST00000433519) Intronic  
PPEF1-AS1 at chrX:18706762-18709723 - (ENST00000430641) 5' overlapping  
PPP1R26-AS1 at chr9:138372161-138372584 - (ENST000006038) Divergent  
PRC1-AS1 at chr15:91509602-91531854 - (ENST00000554388) NAT  
PRICKLE2-AS1 at chr3:64085454-64086790 - (ENST00000460946) NAT  
PRKAG2-AS1 at chr7:151574550-151576299 - (ENST0000046745) NAT  
PRKAR2A-AS1 at chr3:48885390-48889414 - (ENST00000416209) Divergent  
PRKCQ-AS1 at chr10:6625641-6626260 - (ENST00000449648) Divergent  
PRKG1-AS1 at chr10:54060563-54073888 - (ENST00000420193) NAT  
PRKX-AS1 at chrX:3577528-3586233 - (ENST00000414074) Intronic

PRMT5-AS1 at chr14:23390250-23396105 - (ENST00000590290) NAT  
PROSER2-AS1 at chr10:11899288-11916794 - (ENST0000045324) 3' overlapping  
PROX1-AS1 at chr1:214139475-214160973 - (ENST00000598091) Divergent  
PRR7-AS1 at chr5:176872980-176874699 - (ENST00000506465) 5' overlapping  
PRRT3-AS1 at chr3:9989088-9996471 - (ENST00000431558) NAT  
PSMD5-AS1 at chr9:123609011-123613557 - (ENST0000058791) Divergent  
PSMG3-AS1 at chr7:1609870-1615607 - (ENST00000524978) Divergent  
PTCSC3 at chr14:36604916-36645857 Non-overlapping 3'utr  
PTENP1-AS at chr9:33677266-33688008 NAT  
PTOV1-AS1 at chr19:50342484-50354314 - (ENST00000600742) NAT  
PTPRG-AS1 at chr3:62279948-62304307 - (ENST00000479588) NAT  
PVRL3-AS1 at chr3:110765749-110788237 - (ENST00000463025) Divergent  
PXN-AS1 at chr12:120639174-120650941 - (ENST00000535200) NAT  
RAB11B-AS1 at chr19:8439305-8442711 - (ENST00000597407) NAT  
RAB30-AS1 at chr11:82783397-82785010 - (ENST00000530270) Divergent  
RAD21-AS1 at chr8:117886663-117889107 - (ENST00000521487) NAT  
RAD51-AS1 at chr15:40985939-40987305 - (ENST00000499988) NAT  
RAI1-AS1 at chr17:17662468-17674135 - (ENST00000443696) Intronic  
RAMP2-AS1 at chr17:40910313-40913029 - (ENST00000592195) NAT  
RAPGEF4-AS1 at chr2:173587914-173600934 - (ENST000004353) 5' overlapping  
RASAL2-AS1 at chr1:178062285-178062707 - (ENST0000045286) NAT  
RASSF8-AS1 at chr12:26107968-26111998 - (ENST00000537801) Divergent  
RBM12B-AS1 at chr8:94752349-94753001 - (ENST00000391680) Intronic  
RBM26-AS1 at chr13:79980499-79992001 - (ENST00000607864) Intronic  
RBMS3-AS1 at chr3:29968302-29975647 - (ENST00000414547) Intronic  
RBPM5-AS1 at chr8:30239640-30242809 - (ENST00000519753) NAT  
RERG-AS1 at chr12:15304857-15308217 - (ENST00000541243) Intronic  
RGMB-AS1 at chr5:98106784-98108482 - (ENST00000515003) NAT  
RGPD4-AS1 at chr2:108439520-108442583 Divergent  
RHPN1-AS1 at chr8:144450336-144450515 - (ENST00000596598) Divergent  
RMDN2-AS1 at chr2:38263031-38294184 - (ENST00000601029) 3' overlapping  
RNASEH2B-AS1 at chr13:51456745-51484730 - (ENST000005942) 5' overlapping  
RNF144A-AS1 at chr2:7057163-7058810 - (ENST00000437589) 5' overlapping  
RNF157-AS1 at chr17:74150181-74150731 - (ENST00000592748) NAT  
RNF185-AS1 at chr22:31601250-31601602 - (ENST00000526089) NAT  
RNF219-AS1 at chr13:79152611-79191463 - (ENST00000560584) NAT  
ROPN1L-AS1 at chr5:10441402-10441904 - (ENST00000513037) Divergent  
RPL34-AS1 at chr4:109511519-109541616 - (ENST00000510212) Divergent  
RPS6KA2-AS1 at chr6:167317186-167318323 - (ENST000004553) Intronic  
RRM1-AS1 at chr11:4158346-4159487 - (ENST00000529323) NAT  
RSBN1L-AS1 at chr7:77314102-77325570 - (ENST00000447009) NAT  
RUSC1-AS1 at chr1:155289950-155293967 - (ENST00000450199) NAT  
RUVBL1-AS1 at chr3:127794653-127797899 - (ENST0000048521) Intronic  
SACS-AS1 at chr13:23993110-24002818 - (ENST00000443092) Intronic  
SAMSN1-AS1 at chr21:15954523-15970624 - (ENST0000044921) NAT  
SAP30L-AS1 at chr5:153822557-153825382 - (ENST0000052231) 3' overlapping  
SAPCD1-AS1 at chr6 mcf hap5:3111784-3113062 - (ENST00000) NAT

SATB2-AS1 at chr2:200334619-200341658 - (ENST00000416200) NAT  
SBF2-AS1 at chr11:9806698-9812784 - (ENST00000526617) NAT  
SCEL-AS1 at chr13:78173932-78180651 - (ENST00000456280) NAT  
SDCBP2-AS1 at chr20:1306065-1358827 - (ENST00000446423) 3' overlapping  
SEC24B-AS1 at chr4:110351119-110354973 - (ENST0000049935) NAT  
SEC62-AS1 at chr3:169696324-169703503 - (ENST00000479626) Completely overlapping  
SENCR at chr11:128561575-128565918 - (ENST00000526269) 5' overlapping  
SERTAD4-AS1 at chr1:210404801-210407392 - (ENST000004800) 5' overlapping  
SETD5-AS1 at chr3:9435634-9438752 - (ENST00000383834) Divergent  
SGOL1-AS1 at chr3:20215778-20227607 - (ENST00000441442) NAT  
SH3BP5-AS1 at chr3:15298962-15300563 - (ENST00000436602) NAT  
SH3RF3-AS1 at chr2:109743783-109745386 - (ENST0000056749) NAT  
SHANK2-AS1 at chr11:70477199-70481595 - (ENST00000429561) Intronic  
SIAH2-AS1 at chr3:150479724-150480325 - (ENST00000461943) NAT  
SIDT1-AS1 at chr3:113307595-113309036 - (ENST00000462180) Intronic  
SIX3-AS1 at chr2:45167723-45168633 - (ENST00000456467) Divergent  
SLC25A21-AS1 at chr14:37641093-37643016 - (ENST000005566) NAT  
SLC25A30-AS1 at chr13:45992297-45994506 - (ENST000005066) NAT  
SLC25A5-AS1 at chrX:118600387-118603061 - (ENST000004457) NAT  
SLC26A4-AS1 at chr7:107301746-107302596 - (ENST000004497) NAT  
SLC2A1-AS1 at chr1:43424775-43442099 - (ENST00000416689) NAT  
SLC39A12-AS1 at chr10:18292033-18296199 - (ENST000004452) NAT  
SLC6A1-AS1 at chr3:11047784-11060910 - (ENST00000414969) 5' overlapping  
SLC7A11-AS1 at chr4:139092784-139095924 - (ENST000005125) NAT  
SLC8A1-AS1 at chr2:40478563-40481686 - (ENST00000417875) 3' overlapping  
SLC9A9-AS1 at chr3:143061088-143065913 - (ENST0000047903) Intronic  
SMAD5-AS1 at chr5:135465196-135470579 - (ENST0000029716) NAT  
SMAD9-AS1 at chr13:37423503-37424183 - (ENST00000437983) Intronic  
SMARCA5-AS1 at chr4:144434625-144435788 - (ENST00000500) NAT  
SMC5-AS1 at chr9:72808913-72873782 - (ENST00000594708) Divergent  
SMG7-AS1 at chr1:183430881-183440864 - (ENST00000432837) Divergent  
SMIM2-AS1 at chr13:44717729-44813010 - (ENST00000437867) NAT  
SNAI3-AS1 at chr16:88751542-88753587 - (ENST00000596908) Completely overlapping  
SNAP25-AS1 at chr20:10085033-10200172 - (ENST00000605592) 5' overlapping  
SNAP47-AS1 at chr1:227931532-227934892 - (ENST0000041334) Intronic  
SNRK-AS1 at chr3:43391136-43393454 - (ENST00000422681) NAT  
SOCS2-AS1 at chr12:93959360-93965174 - (ENST00000551626) 5' overlapping  
SORCS3-AS1 at chr10:106424366-106425958 - (ENST000004498) Intronic  
SOX21-AS1 at chr13:95364970-95368500 - (ENST00000438290) Divergent  
SPAG5-AS1 at chr17:26942702-26944390 - (ENST00000584675) Divergent  
SPATA13-AS1 at chr13:24826887-24828577 - (ENST0000043073) Intronic  
SPATA8-AS1 at chr15:97315237-97326542 - (ENST00000558722) Divergent  
SPIN4-AS1 at chrX:62569525-62572057 - (ENST00000451979) NAT  
SPTY2D1-AS1 at chr11:18624534-18625440 - (ENST0000054217) NAT  
SRD5A3-AS1 at chr4:56230138-56249563 - (ENST00000433175) 3' overlapping  
SRGAP2-AS1 at chr1:206552219-206554954 - (ENST0000045087) Completely overlapping

SRGAP3-AS1 at chr3:9055807-9057663 - (ENST00000414633) NAT  
SRP14-AS1 at chr15:40356588-40357906 - (ENST00000559012) Divergent  
SRRM2-AS1 at chr16:2799787-2802519 - (ENST00000570677) NAT  
SSSCA1-AS1 at chr11:65337131-65337744 - (ENST00000567594) Divergent  
SSTR5-AS1 at chr16:1116494-1128707 - (ENST00000566499) 5' overlapping  
ST3GAL6-AS1 at chr3:98434149-98451495 - (ENST00000461931) NAT  
ST7-AS1 at chr7:116592500-116594388 - (ENST00000456775) NAT  
ST8SIA6-AS1 at chr10:17450026-17455502 - (ENST00000451190) Completely overlapping  
STARD4-AS1 at chr5:111066086-111067878 - (ENST0000051322) NAT  
STAU2-AS1 at chr8:74332309-74353761 - (ENST00000517604) 3' overlapping  
STEAP2-AS1 at chr7:89838584-89840949 - (ENST00000433534) Completely overlapping  
STEAP3-AS1 at chr2:120001998-120006647 - (ENST0000045426) NAT  
STK24-AS1 at chr13:99229498-99231084 - (ENST00000434547) Divergent  
STK4-AS1 at chr20:43592441-43594258 - (ENST00000445571) Divergent  
STPG2-AS1 at chr4:98288077-98411315 - (ENST00000508933) Divergent  
STT3A-AS1 at chr11:125443352-125462473 - (ENST0000053271) Divergent  
STX18-AS1 at chr4:4544145-4546787 - (ENST00000514763) Divergent  
STXBP5-AS1 at chr6:147440553-147523603 - (ENST0000041750) NAT  
SUCLA2-AS1 at chr13:48575525-48576688 - (ENST00000423869) Intronic  
SYNE1-AS1 at chr6:152701681-152702699 - (ENST00000412161) NAT  
SYNPR-AS1 at chr3:63409272-63535727 - (ENST00000488201) Completely overlapping  
SYP-AS1 at chrX:49055425-49058913 - (ENST00000433499) NAT  
SZT2-AS1 at chr1:43913447-43914315 - (ENST00000396885) NAT  
TAB3-AS1 at chrX:30852740-30853417 - (ENST00000428263) Intronic  
TAPT1-AS1 at chr4:16228668-16259810 - (ENST00000570786) Divergent  
TBC1D4-AS1 at chr13:75949647-75951430 - (ENST00000440094) Intronic  
TBL1XR1-AS1 at chr3:176762649-176765711 - (ENST000004547) Completely overlapping  
TBX5-AS1 at chr12:114849094-114849329 - (ENST00000595315) NAT  
TCEAL3-AS1 at chrX:102881004-102881420 - (ENST0000042488) Intronic  
TET2-AS1 at chr4:106092511-106099220 - (ENST00000515414) Intronic  
TEX26-AS1 at chr13:31505924-31507568 - (ENST00000591300) Divergent  
THAP7-AS1 at chr22:21356497-21364631 - (ENST00000452284) NAT  
THAP9-AS1 at chr4:83820976-83821722 - (ENST00000503704) NAT  
THOC7-AS1 at chr3:63846321-63847495 - (ENST00000468961) Intronic  
THRB-AS1 at chr3:24540116-24541109 - (ENST00000594183) 5' overlapping  
TIE1-AS1 NAT  
TIPARP-AS1 at chr3:156389711-156390659 - (ENST00000463445) NAT  
TLR8-AS1 at chrX:12920936-12926452 - (ENST00000451564) Completely overlapping  
TM4SF19-AS1 at chr3:196045277-196051059 - (ENST000004445) NAT  
TM4SF1-AS1 at chr3:149096006-149104368 - (ENST0000048404) Divergent  
TMEM161B-AS1 at chr5:87722512-87732183 - (ENST000005136) Divergent  
TMEM212-AS1 at chr3:171594142-171618530 - (ENST00000449) Intronic  
TMEM220-AS1 at chr17:10633113-10718481 - (ENST000005808) NAT  
TMEM254-AS1 at chr10:81806616-81838651 - (ENST000004122) NAT  
TMEM44-AS1 at chr3:194304740-194310989 - (ENST000004536) 3' overlapping  
TMEM51-AS1 at chr1:15442448-15478898 - (ENST00000404665) Divergent  
TMEM5-AS1 at chr12:64202625-64215936 - (ENST00000546214) NAT

TMEM72-AS1 at chr10:45306472-45455137 - (ENST0000045028) Completely overlapping  
TMEM9B-AS1 at chr11:8986222-8997830 - (ENST00000525484) NAT  
TMLHE-AS1 at chrX:154695631-154697321 - (ENST0000054115) 3' overlapping  
TMPO-AS1 at chr12:98906751-98910200 - (ENST00000548760) NAT  
TMRSS4-AS1 at chr11:117886487-117957508 - (ENST000005275) 5' overlapping  
TNKS2-AS1 at chr10:93542596-93558048 - (ENST00000432938) Divergent  
TNRC6C-AS1 at chr17:76103479-76106416 - (ENST00000592939) NAT  
TOB1-AS1 at chr17:48944040-48945668 - (ENST00000416263) NAT  
TOLLIP-AS1 at chr11:1330999-1331937 - (ENST00000530897) Divergent  
TOPORS-AS1 at chr9:32551142-32553002 - (ENST00000453396) NAT  
TP73-AS1 at chr1:3652548-3663340 - (ENST00000418088) NAT  
TPRG1-AS2 at chr3:188659504-188665428 - (ENST00000444488) NAT  
TPRG1-AS1 at chr3:188659504-188665428 - (ENST00000444488) Divergent  
TPT1-AS1 at chr13:45915480-45965618 - (ENST00000517509) Divergent  
TRAF3IP2-AS1 at chr6:111804714-111814206 - (ENST000005327) NAT  
TRAM2-AS1 at chr6:52442105-52448783 - (ENST00000606714) Divergent  
TRAPPC12-AS1 at chr2:3485013-3486180 - (ENST00000453806) Intronic  
TRHDE-AS1 at chr12:72647288-72652020 - (ENST00000549957) NAT  
TRIM31-AS1 at chr6:30073017-30082501 - (ENST00000440874) NAT  
TRMT2B-AS1 at chrX:100297573-100298694 - (ENST000004438) Intronic  
TRPC7-AS1 at chr5:135549736-135557847 - (ENST00000514459) NAT  
TSIX at chrX:73012040-73049066 NAT  
TSPEAR-AS1 at chr21:45926690-45935738 - (ENST00000451035) NAT  
TTC28-AS1 at chr22:28315364-28389280 - (ENST00000430853) NAT  
TTC3-AS1 at chr21:38559967-38566227 - (ENST00000424733) NAT  
TLL10-AS1 at chr1:1108436-1114935 - (ENST00000379317) NAT  
TTN-AS1 at chr2:179385910-179396305 - (ENST00000585625) NAT  
TUG1 at chr22:31365634-31375380 Divergent  
UBAC2-AS1 at chr13:99848631-99852964 - (ENST00000426037) NAT  
UBE2E1-AS1 at chr3:23845515-23848396 - (ENST00000426702) 5' overlapping  
UBE2Q1-AS1 at chr1:154526085-154527493 - (ENST000004416) NAT  
UBL7-AS1 at chr15:74753606-74771563 - (ENST00000564137) Divergent  
UBOX5-AS1 at chr20:3087559-3131513 - (ENST00000446537) NAT  
UBXN7-AS1 at chr3:196158235-196160242 - (ENST0000059888) NAT  
UCHL1-AS1 at chr4:41222091-41258744 - (ENST00000507190) NAT  
UFL1-AS1 at chr6:96806250-96969545 - (ENST00000430796) Divergent  
UGDH-AS1 at chr4:39529639-39596327 - (ENST00000504032) Divergent  
UNC5B-AS1 at chr10:72976981-72977582 - (ENST00000449737) Intronic  
UPK1A-AS1 at chr19:36158850-36164193 - (ENST00000443196) Divergent  
USP12-AS2 at chr13:27736992-27743272 - (ENST00000440657) Intronic  
USP12-AS1 at chr13:27736992-27743272 - (ENST00000440657) Intronic  
USP27X-AS1 at chrX:49641892-49643844 - (ENST00000437322) Divergent  
USP2-AS1 at chr11:119252488-119280472 - (ENST00000577297) Divergent  
USP30-AS1 at chr12:109490155-109491757 - (ENST0000047880) NAT  
USP3-AS1 at chr15:63836446-63881253 - (ENST00000560350) NAT  
USP46-AS1 at chr4:53525573-53527835 - (ENST00000503051) Divergent  
UXT-AS1 at chrX:47518232-47519510 NAT

VAC14-AS1 at chr16:70789001-70807154 - (ENST00000562507) NAT  
VAV3-AS1 at chr1:108507065-108537229 - (ENST00000438318) 5' overlapping  
VCAN-AS1 at chr5:82827171-82858133 - (ENST00000512090) Completely overlapping  
VIM-AS1 at chr10:17256238-17268897 - (ENST00000437232) NAT  
VIPR1-AS1 at chr3:42548016-42573554 - (ENST00000600342) Completely overlapping  
VPS13A-AS1 at chr9:79791672-79792910 - (ENST00000415172) NAT  
VPS9D1-AS1 at chr16:89778264-89784573 - (ENST00000562866) NAT  
WAC-AS1 at chr10:28811581-28821672 - (ENST00000527986) Divergent  
WASF3-AS1 at chr13:27180681-27215501 - (ENST00000586418) Completely overlapping  
WASF3-AS1 at chr13:27214658-27215501 - (ENST00000585599) NAT  
WDFY3-AS2 at chr4:85724411-85731544 - (ENST00000510449) NAT  
WDFY3-AS1 at chr4:85724411-85731544 - (ENST00000510449) NAT  
WDR11-AS1 at chr10:122521324-122536396 - (ENST000004561) NAT  
WDR52-AS1 at chr3:113122838-113145893 - (ENST0000047332) NAT  
WDR86-AS1 at chr7:151106247-151110440 - (ENST0000048963) 5' overlapping  
WEE2-AS1 at chr7:141404138-141438030 - (ENST00000488785) NAT  
WNT5A-AS1 at chr3:55521727-55522336 - (ENST00000469484) Divergent  
WWC2-AS2 at chr4:184154781-184161787 - (ENST00000511846) Divergent  
WWC2-AS1 at chr4:184154781-184161787 - (ENST00000511846) Intronic  
WWC3-AS1 at chrX:9992882-10006694 - (ENST00000430057) Intronic  
WWTR1-AS1 at chr3:149374807-149376098 - (ENST0000049505) Intronic  
XIAP-AS1 at chrX:123006476-123007782 - (ENST00000458331) Intronic  
XIRP2-AS1 at chr2:167980414-167997465 - (ENST00000525330) Completely overlapping  
XXYLT1-AS1 at chr3:194815317-194816786 - (ENST0000045853) Intronic  
YEATS2-AS1 at chr3:183524245-183526729 - (ENST0000042500) NAT  
YTHDF3-AS1 at chr8:64080284-64081001 - (ENST00000603538) Divergent  
ZBED3-AS1 at chr5:76382565-76443781 - (ENST00000503969) 5' overlapping  
ZBED5-AS1 at chr11:10879806-10900823 - (ENST00000501079) Divergent  
ZBTB11-AS1 at chr3:101395274-101396431 - (ENST0000053686) NAT  
ZBTB20-AS1 at chr3:114070658-114085891 - (ENST0000049621) Completely overlapping  
ZEB1-AS1 at chr10:31495207-31608620 - (ENST00000605946) NAT  
ZEB2-AS1 at chr2:145278173-145279044 - (ENST00000595449) NAT  
ZFAT-AS1 at chr8:135610314-135612932 - (ENST00000505776) NAT  
ZFHX4-AS1 at chr8:77403435-77595391 - (ENST00000522961) 5' overlapping  
ZFX-AS1 at chrX:24164342-24167771 - (ENST00000427551) NAT  
ZFY-AS1 at chrY:2834885-2870667 - (ENST00000417305) NAT  
ZIC4-AS1 at chr3:147104754-147105240 - (ENST00000462168) NAT  
ZMIZ1-AS1 at chr10:80703085-80827652 - (ENST00000456353) Divergent  
ZMYM4-AS1 at chr1:35824423-35831678 - (ENST00000432683) NAT  
ZMYND10-AS1 at chr3:50378537-50383128 - (ENST0000044001) NAT  
ZNF197-AS1 at chr3:44658620-44666289 - (ENST00000447691) Divergent  
ZNF205-AS1 at chr16:3160461-3165599 - (ENST00000572691) NAT  
ZNF252P-AS1 at chr8:146228197-146231432 - (ENST000005270) NAT  
ZNF32-AS2 at chr10:44139320-44140495 - (ENST00000453284) NAT  
ZNF32-AS1 at chr10:44139320-44140495 - (ENST00000453284) 3' overlapping  
ZNF385D-AS1 at chr3:21584308-21621451 - (ENST00000412369) Completely overlapping  
ZNF503-AS1 at chr10:77029577-77118465 - (ENST00000524517) Divergent

ZNF571-AS1 at chr19:38039816-38076660 - (ENST00000591430) NAT  
ZNF582-AS1 at chr19:56905025-56909521 - (ENST00000591172) Divergent  
ZNF630-AS1 at chrX:47915699-47925971 - (ENST00000436124) 3' overlapping  
ZNF667-AS1 at chr19:56989559-57005688 - (ENST00000591797) Divergent  
ZNF674-AS1 at chrX:46404928-46407671 - (ENST00000421685) Divergent  
ZNRD1-AS1 at chr6:29968788-30028705 - (ENST00000425604) NAT  
ZNRF3-AS1 at chr22:29420987-29427464 - (ENST00000325660) Intronic  
ZRANB2-AS1 at chr1:71514538-71532867 - (ENST00000450461) NAT

NAT = 332/707 = 47.0%

Intronic = 133/707 = 18.8%

Divergent = 116/707 = 16.4%

Completely overlapping = 52/707 = 7.4%

5' overlapping = 50/707 = 7.1%

3' overlapping = 24/707 = 3.4%
